# Supplementary material for: Comparative Label-Free Quantitative Proteomics Analysis Reveals the Essential Roles of N-Glycans in Salt Tolerance by Modulating Protein Abundance in Arabidopsis
Source: Front Plant Sci. 2021 Jul 2;12:646425. doi: 10.3389/fpls.2021.646425 (PMC8283305; doi:10.3389/fpls.2021.646425)
Supplement: Supplementary file 1 [file Table_1.xlsx]

## Sheet: GO wt comparison
WT control								WT nacl
GO term	Ontology	Description	Number in input list	Number in BG/Ref	p-value	FDR		GO term	Ontology	Description	Number in input list	Number in BG/Ref	p-value	FDR
GO:0005623	C	cell	183	22664	1.5e-05	0.00014		GO:0005623	C	cell	221	22664	1.1e-06	1.2e-05
GO:0044464	C	cell part	183	22662	1.5e-05	0.00014		GO:0044464	C	cell part	221	22662	1.1e-06	1.2e-05
GO:0005618	C	cell wall	52	706	2.5e-36	1.1e-34		GO:0005618	C	cell wall	60	706	2.2e-40	9.8e-39
GO:0005737	C	cytoplasm	130	13406	5.5e-07	6.5e-06		GO:0005737	C	cytoplasm	150	13406	3.3e-06	3.4e-05
GO:0044444	C	cytoplasmic part	126	10923	4.5e-12	6.6e-11		GO:0044444	C	cytoplasmic part	145	10923	1.7e-11	2.4e-10
GO:0012505	C	endomembrane system	68	2143	1.6e-26	5.6e-25		GO:0012505	C	endomembrane system	77	2143	8.7e-28	3.1e-26
GO:0005783	C	endoplasmic reticulum	40	895	3e-20	7.5e-19		GO:0005783	C	endoplasmic reticulum	42	895	7.5e-19	1.9e-17
GO:0005768	C	endosome	18	405	1.4e-09	1.9e-08		GO:0005768	C	endosome	22	405	1.8e-11	2.4e-10
GO:0031975	C	envelope	21	1170	0.00011	0.00087
GO:0030312	C	external encapsulating structure	52	706	2.5e-36	1.1e-34		GO:0030312	C	external encapsulating structure	60	706	2.2e-40	9.8e-39
GO:0031012	C	extracellular matrix	5	34	7.8e-06	8.6e-05		GO:0031012	C	extracellular matrix	5	34	1.9e-05	0.00018
GO:0005576	C	extracellular region	105	2954	1.2e-48	2.1e-46		GO:0005576	C	extracellular region	124	2954	8.4e-56	1.5e-53
GO:0044421	C	extracellular region part	8	142	1.2e-05	0.00012		GO:0044421	C	extracellular region part	9	142	6e-06	5.8e-05
GO:0005794	C	Golgi apparatus	35	1182	1.2e-12	2e-11		GO:0005794	C	Golgi apparatus	41	1182	4.3e-14	8.5e-13
GO:0070013	C	intracellular organelle lumen	18	1008	0.00036	0.0026		GO:0044446	C	intracellular organelle part	87	4882	3e-12	5.4e-11
GO:0044446	C	intracellular organelle part	83	4882	1.3e-15	2.8e-14
GO:0016020	C	membrane	133	8532	9.5e-26	2.8e-24		GO:0016020	C	membrane	154	8532	9.2e-27	2.7e-25
GO:0031974	C	membrane-enclosed lumen	18	1008	0.00036	0.0026		GO:0042579	C	microbody	9	247	0.00035	0.003
GO:0031967	C	organelle envelope	21	1170	0.00011	0.00087
GO:0043233	C	organelle lumen	18	1008	0.00036	0.0026		GO:0005777	C	peroxisome	9	247	0.00035	0.003
GO:0044422	C	organelle part	83	4894	1.5e-15	2.9e-14		GO:0044422	C	organelle part	87	4894	3.5e-12	5.6e-11
GO:0005886	C	plasma membrane	67	3735	2.5e-13	4.4e-12		GO:0005886	C	plasma membrane	83	3735	6.4e-17	1.4e-15
GO:0009536	C	plastid	53	4213	1.7e-05	0.00015		GO:0009536	C	plastid	56	4213	0.00045	0.0036
GO:0009579	C	thylakoid	20	584	1.2e-08	1.5e-07		GO:0009579	C	thylakoid	19	584	1.1e-06	1.2e-05
GO:0005773	C	vacuole	68	1359	4.8e-38	4.3e-36		GO:0005773	C	vacuole	81	1359	1.8e-44	1.6e-42
GO:0030246	F	carbohydrate binding	11	303	1.5e-05	0.00019		GO:0030246	F	carbohydrate binding	12	303	1.7e-05	0.00029
GO:0003824	F	catalytic activity	124	9101	9.6e-18	3.6e-16		GO:0003824	F	catalytic activity	148	9101	2.5e-20	1.3e-18
GO:0016787	F	hydrolase activity	60	3279	3.3e-12	6.1e-11		GO:0016787	F	hydrolase activity	71	3279	1e-13	2.5e-12
								GO:0016788	F	hydrolase activity, acting on ester bonds	21	1131	0.00085	0.0084
								GO:0016740	F	transferase activity	52	3791	0.00036	0.0045
GO:0005975	P	carbohydrate metabolic process	46	1144	1.7e-21	4.3e-19		GO:0005975	P	carbohydrate metabolic process	52	1144	1e-22	2.7e-20
GO:0009056	P	catabolic process	41	1430	2.9e-14	2.5e-12		GO:0009056	P	catabolic process	45	1430	6e-14	8e-12
GO:0008219	P	cell death	8	194	9.8e-05	0.0016		GO:0008219	P	cell death	8	194	0.00034	0.0049
GO:0016049	P	cell growth	11	428	0.0003	0.0043
GO:0019725	P	cellular homeostasis	10	314	0.00011	0.0016		GO:0019725	P	cellular homeostasis	11	314	0.00011	0.0018
GO:0009987	P	cellular process	123	12771	3.2e-06	6.4e-05		GO:0009987	P	cellular process	144	12771	4.7e-06	0.00012
								GO:0006464	P	cellular protein modification process	36	2126	7.4e-05	0.0013
GO:0006091	P	generation of precursor metabolites and energy	14	364	5.4e-07	1.5e-05		GO:0006091	P	generation of precursor metabolites and energy	13	364	2.2e-05	0.00046
GO:0042592	P	homeostatic process	14	542	4.4e-05	0.0008		GO:0042592	P	homeostatic process	15	542	8.9e-05	0.0015
GO:0008152	P	metabolic process	122	12035	1.6e-07	5.2e-06		GO:0008152	P	metabolic process	145	12035	3.8e-08	2.1e-06
GO:0051704	P	multi-organism process	30	1631	2e-06	4.7e-05		GO:0051704	P	multi-organism process	35	1631	6.5e-07	2.2e-05
GO:0015979	P	photosynthesis	13	253	5.9e-08	2.5e-06		GO:0015979	P	photosynthesis	12	253	3e-06	8.2e-05
GO:0044238	P	primary metabolic process	97	9890	6.8e-05	0.0012		GO:0044238	P	primary metabolic process	116	9890	2.1e-05	0.00046
								GO:0019538	P	protein metabolic process	58	4289	0.00022	0.0033
GO:0009628	P	response to abiotic stimulus	41	2022	1.2e-09	6.1e-08		GO:0009628	P	response to abiotic stimulus	41	2022	2.7e-07	1e-05
GO:0009607	P	response to biotic stimulus	28	1253	1.1e-07	3.9e-06		GO:0009607	P	response to biotic stimulus	32	1253	4.9e-08	2.2e-06
GO:0009719	P	response to endogenous stimulus	31	1732	2.3e-06	5e-05		GO:0009719	P	response to endogenous stimulus	32	1732	4e-05	0.00076
GO:0009605	P	response to external stimulus	30	1582	1.1e-06	2.8e-05		GO:0009605	P	response to external stimulus	34	1582	9.3e-07	2.8e-05
GO:0050896	P	response to stimulus	90	6250	8.7e-13	5.6e-11		GO:0050896	P	response to stimulus	100	6250	1.8e-11	1.2e-09
GO:0006950	P	response to stress	67	3506	1.2e-14	1.6e-12		GO:0006950	P	response to stress	73	3506	2.7e-13	2.4e-11

## Sheet: GO mns1mns2 comparison
mns1mns2 control								mns1mns2 nacl
GO term	Ontology	Description	Number in input list	Number in BG/Ref	p-value	FDR		GO term	Ontology	Description	Number in input list	Number in BG/Ref	p-value	FDR
GO:0005623	C	cell	273	22664	6.4e-05	0.00066		GO:0005623	C	cell	264	22664	4.3e-06	4.5e-05
GO:0044464	C	cell part	273	22662	6.3e-05	0.00066		GO:0044464	C	cell part	264	22662	4.2e-06	4.5e-05
GO:0005618	C	cell wall	71	706	7.1e-45	3.3e-43		GO:0005618	C	cell wall	69	706	2.5e-44	1.1e-42
								GO:0005737	C	cytoplasm	169	13406	0.0003	0.0027
GO:0044444	C	cytoplasmic part	166	10923	5.1e-08	7.4e-07		GO:0044444	C	cytoplasmic part	165	10923	9.2e-10	1.3e-08
GO:0012505	C	endomembrane system	91	2143	1.3e-29	4.1e-28		GO:0012505	C	endomembrane system	91	2143	2e-31	6.1e-30
GO:0005783	C	endoplasmic reticulum	40	895	1.2e-13	2.3e-12		GO:0005783	C	endoplasmic reticulum	44	895	3.8e-17	7.7e-16
GO:0005768	C	endosome	29	405	6.4e-15	1.3e-13		GO:0005768	C	endosome	26	405	5.7e-13	1e-11
GO:0030312	C	external encapsulating structure	71	706	7.1e-45	3.3e-43		GO:0030312	C	external encapsulating structure	69	706	2.5e-44	1.1e-42
GO:0031012	C	extracellular matrix	7	34	2.6e-07	3.2e-06		GO:0031012	C	extracellular matrix	7	34	1.9e-07	2.4e-06
GO:0005576	C	extracellular region	149	2954	5.5e-62	1e-59		GO:0005576	C	extracellular region	144	2954	4.2e-61	7.6e-59
GO:0044421	C	extracellular region part	12	142	1.2e-07	1.6e-06		GO:0044421	C	extracellular region part	11	142	5.7e-07	6.8e-06
GO:0005794	C	Golgi apparatus	57	1182	1.2e-20	2.7e-19		GO:0005794	C	Golgi apparatus	53	1182	6.8e-19	1.6e-17
GO:0044446	C	intracellular organelle part	98	4882	4.9e-10	8.3e-09		GO:0044446	C	intracellular organelle part	98	4882	2.2e-11	3.7e-10
GO:0000323	C	lytic vacuole	5	41	0.00013	0.0013		GO:0000323	C	lytic vacuole	5	41	0.00011	0.001
GO:0016020	C	membrane	205	8532	7.1e-39	2.6e-37		GO:0016020	C	membrane	194	8532	2.1e-36	7.5e-35
GO:0044422	C	organelle part	98	4894	5.5e-10	8.6e-09		GO:0044422	C	organelle part	98	4894	2.6e-11	3.9e-10
GO:0005886	C	plasma membrane	113	3735	5.8e-25	1.5e-23		GO:0005886	C	plasma membrane	105	3735	2e-22	5.2e-21
GO:0009579	C	thylakoid	19	584	3.5e-05	0.0004		GO:0009579	C	thylakoid	19	584	1.8e-05	0.00018
GO:0005773	C	vacuole	92	1359	2.7e-45	2.5e-43		GO:0005773	C	vacuole	91	1359	2.1e-46	1.9e-44
GO:0030246	F	carbohydrate binding	15	303	2.2e-06	3.2e-05		GO:0030246	F	carbohydrate binding	13	303	2.6e-05	0.00026
GO:0003824	F	catalytic activity	190	9101	5.8e-26	4.1e-24		GO:0003824	F	catalytic activity	179	9101	7.1e-24	3.8e-22
GO:0016787	F	hydrolase activity	89	3279	3.3e-16	1.2e-14		GO:0016787	F	hydrolase activity	81	3279	9.2e-14	2.5e-12
GO:0016301	F	kinase activity	39	1436	2.4e-07	4.2e-06		GO:0016301	F	kinase activity	35	1436	3.5e-06	4.8e-05
GO:0060089	F	molecular transducer activity	9	209	0.00064	0.0057
GO:0004872	F	receptor activity	9	209	0.00064	0.0057
GO:0016740	F	transferase activity	77	3791	4.6e-08	1.1e-06		GO:0016740	F	transferase activity	71	3791	5.2e-07	9.3e-06
GO:0016772	F	transferase activity, transferring phosphorus-containing groups	40	1657	2.9e-06	3.5e-05		GO:0016772	F	transferase activity, transferring phosphorus-containing groups	36	1657	2.9e-05	0.00026
GO:0009653	P	anatomical structure morphogenesis	22	919	0.00061	0.0078		GO:0009653	P	anatomical structure morphogenesis	24	919	4.6e-05	0.00075
GO:0005975	P	carbohydrate metabolic process	65	1144	2.5e-27	7.1e-25		GO:0005975	P	carbohydrate metabolic process	61	1144	1.9e-25	5.3e-23
GO:0009056	P	catabolic process	47	1430	2.9e-11	2e-09		GO:0009056	P	catabolic process	47	1430	4.9e-12	4.5e-10
GO:0016049	P	cell growth	19	428	4.8e-07	1.5e-05		GO:0016049	P	cell growth	18	428	9.9e-07	2.5e-05
GO:0016043	P	cellular component organization	49	2456	3.3e-05	0.0006		GO:0016043	P	cellular component organization	44	2456	0.0003	0.0037
								GO:0019725	P	cellular homeostasis	12	314	0.00015	0.0021
								GO:0044267	P	cellular protein metabolic process	60	3841	0.00078	0.0089
GO:0009987	P	cellular process	182	12771	7.8e-07	2e-05		GO:0009987	P	cellular process	176	12771	2.7e-07	7.3e-06
GO:0006464	P	cellular protein modification process	49	2126	7.2e-07	2e-05		GO:0006464	P	cellular protein modification process	50	2126	6.3e-08	2.2e-06
GO:0006091	P	generation of precursor metabolites and energy	13	364	0.00025	0.0036		GO:0006091	P	generation of precursor metabolites and energy	13	364	0.00016	0.0021
GO:0040007	P	growth	19	678	0.00023	0.0034		GO:0040007	P	growth	18	678	0.00034	0.0041
GO:0042592	P	homeostatic process	16	542	0.00041	0.0055		GO:0042592	P	homeostatic process	17	542	7.5e-05	0.0011
GO:0043412	P	macromolecule modification	49	2532	7.1e-05	0.0012		GO:0043412	P	macromolecule modification	50	2532	9.2e-06	0.0002
GO:0008152	P	metabolic process	179	12035	3.7e-08	1.5e-06		GO:0008152	P	metabolic process	174	12035	6.8e-09	3.1e-07
GO:0051704	P	multi-organism process	46	1631	5.5e-09	2.6e-07		GO:0051704	P	multi-organism process	44	1631	9.8e-09	3.9e-07
GO:0015979	P	photosynthesis	12	253	3.4e-05	0.0006		GO:0015979	P	photosynthesis	12	253	2.1e-05	0.00036
GO:0044238	P	primary metabolic process	145	9890	9.4e-06	0.00022		GO:0044238	P	primary metabolic process	138	9890	1.5e-05	0.00027
GO:0019538	P	protein metabolic process	75	4289	1.9e-05	0.00042		GO:0019538	P	protein metabolic process	73	4289	1.1e-05	0.00022
GO:0009628	P	response to abiotic stimulus	43	2022	2.6e-05	0.00052		GO:0009628	P	response to abiotic stimulus	43	2022	7.5e-06	0.00017
GO:0009607	P	response to biotic stimulus	41	1253	6.9e-10	3.9e-08		GO:0009607	P	response to biotic stimulus	39	1253	1.8e-09	9.7e-08
GO:0009719	P	response to endogenous stimulus	36	1732	0.00019	0.003		GO:0009719	P	response to endogenous stimulus	35	1732	0.00015	0.0021
GO:0009605	P	response to external stimulus	43	1582	5.2e-08	1.8e-06		GO:0009605	P	response to external stimulus	41	1582	9.7e-08	3e-06
GO:0050896	P	response to stimulus	120	6250	2.7e-11	2e-09		GO:0050896	P	response to stimulus	115	6250	4e-11	2.7e-09
GO:0006950	P	response to stress	87	3506	1.3e-13	1.8e-11		GO:0006950	P	response to stress	84	3506	1.4e-13	1.9e-11
								GO:0019748	P	secondary metabolic process	14	492	0.00081	0.0089

## Sheet: GO cgl1 comparison
cgl1 control								cgl1 nacl
GO term	Ontology	Description	Number in input list	Number in BG/Ref	p-value	FDR		GO term	Ontology	Description	Number in input list	Number in BG/Ref	p-value	FDR
GO:0005623	C	cell	269	22664	1.1e-06	1.4e-05		GO:0005623	C	cell	236	22664	1.7e-06	1.7e-05
GO:0044464	C	cell part	269	22662	1.1e-06	1.4e-05		GO:0044464	C	cell part	236	22662	1.7e-06	1.7e-05
GO:0005618	C	cell wall	67	706	7.3e-42	3.3e-40		GO:0005618	C	cell wall	63	706	1.3e-41	5.8e-40
GO:0005737	C	cytoplasm	177	13406	1.9e-05	0.00019		GO:0005737	C	cytoplasm	158	13406	9.2e-06	8.8e-05
GO:0044444	C	cytoplasmic part	173	10923	9.2e-12	1.3e-10		GO:0044444	C	cytoplasmic part	153	10923	3.4e-11	4.7e-10
GO:0012505	C	endomembrane system	99	2143	6.9e-37	2.1e-35		GO:0012505	C	endomembrane system	81	2143	2e-28	6.1e-27
GO:0005783	C	endoplasmic reticulum	43	895	3.3e-16	5.9e-15		GO:0005783	C	endoplasmic reticulum	41	895	6.4e-17	1.5e-15
GO:0005768	C	endosome	32	405	5.9e-18	1.2e-16		GO:0005768	C	endosome	25	405	2.4e-13	4.4e-12
GO:0030312	C	external encapsulating structure	67	706	7.3e-42	3.3e-40		GO:0030312	C	external encapsulating structure	63	706	1.3e-41	5.8e-40
GO:0031012	C	extracellular matrix	6	34	3.4e-06	3.9e-05		GO:0031012	C	extracellular matrix	6	34	1.6e-06	1.7e-05
GO:0005576	C	extracellular region	144	2954	3.8e-60	6.9e-58		GO:0005576	C	extracellular region	127	2954	4.9e-54	8.9e-52
GO:0044421	C	extracellular region part	10	142	4.6e-06	5e-05		GO:0044421	C	extracellular region part	10	142	1.4e-06	1.7e-05
GO:0005794	C	Golgi apparatus	61	1182	2.1e-24	5.4e-23		GO:0005794	C	Golgi apparatus	46	1182	2.5e-16	5.1e-15
GO:0044446	C	intracellular organelle part	104	4882	2.3e-13	3.9e-12		GO:0044446	C	intracellular organelle part	92	4882	2.1e-12	3.5e-11
GO:0000323	C	lytic vacuole	5	41	0.00011	0.001		GO:0000323	C	lytic vacuole	5	41	6e-05	0.00055
GO:0016020	C	membrane	202	8532	1.9e-40	7e-39		GO:0016020	C	membrane	173	8532	2.2e-33	8.1e-32
GO:0044422	C	organelle part	104	4894	2.7e-13	4.1e-12		GO:0044422	C	organelle part	92	4894	2.4e-12	3.7e-11
GO:0005886	C	plasma membrane	107	3735	5e-23	1.1e-21		GO:0005886	C	plasma membrane	91	3735	5e-19	1.3e-17
GO:0009579	C	thylakoid	20	584	6.2e-06	6.3e-05		GO:0009579	C	thylakoid	20	584	7.9e-07	1e-05
GO:0005773	C	vacuole	95	1359	1.4e-49	1.3e-47		GO:0005773	C	vacuole	86	1359	1.4e-46	1.3e-44
GO:0030246	F	carbohydrate binding	14	303	6.8e-06	8.1e-05		GO:0030246	F	carbohydrate binding	12	303	3.5e-05	0.00058
GO:0003824	F	catalytic activity	185	9101	4.8e-26	3.4e-24		GO:0003824	F	catalytic activity	152	9101	3.2e-18	1.6e-16
GO:0016787	F	hydrolase activity	80	3279	5.7e-13	2e-11		GO:0016787	F	hydrolase activity	70	3279	1.3e-11	3.1e-10
GO:0016301	F	kinase activity	39	1436	9.1e-08	1.6e-06		GO:0016301	F	kinase activity	29	1436	7.3e-05	0.00091
GO:0016740	F	transferase activity	78	3791	3.8e-09	9.1e-08		GO:0016740	F	transferase activity	54	3791	0.00067	0.0056
GO:0016772	F	transferase activity, transferring phosphorus-containing groups	40	1657	1.2e-06	1.7e-05		GO:0016772	F	transferase activity, transferring phosphorus-containing groups	30	1657	0.00035	0.0035
GO:0009653	P	anatomical structure morphogenesis	24	919	5.7e-05	0.00089		GO:0009653	P	anatomical structure morphogenesis	20	919	0.0004	0.0056
GO:0005975	P	carbohydrate metabolic process	65	1144	2.9e-28	8e-26		GO:0005975	P	carbohydrate metabolic process	52	1144	3.1e-21	8.2e-19
GO:0009056	P	catabolic process	46	1430	2.8e-11	1.9e-09		GO:0009056	P	catabolic process	45	1430	8.2e-13	1.1e-10
GO:0016043	P	cellular component organization	49	2456	1.3e-05	0.00025		GO:0008219	P	cell death	8	194	0.00055	0.0072
GO:0016049	P	cell growth	19	428	2.8e-07	7.1e-06		GO:0016049	P	cell growth	15	428	1.5e-05	0.00033
GO:0019725	P	cellular homeostasis	12	314	0.00017	0.0023		GO:0019725	P	cellular homeostasis	10	314	0.00082	0.0098
GO:0009987	P	cellular process	182	12771	2.3e-08	8e-07		GO:0009987	P	cellular process	153	12771	5.8e-06	0.00015
GO:0006464	P	cellular protein modification process	50	2126	9.7e-08	2.7e-06		GO:0006464	P	cellular protein modification process	41	2126	6.1e-06	0.00015
GO:0006091	P	generation of precursor metabolites and energy	13	364	0.00018	0.0023		GO:0006091	P	generation of precursor metabolites and energy	12	364	0.00019	0.0033
GO:0040007	P	growth	19	678	0.00014	0.002
GO:0042592	P	homeostatic process	17	542	8.8e-05	0.0013		GO:0042592	P	homeostatic process	14	542	0.00062	0.0078
GO:0043412	P	macromolecule modification	50	2532	1.3e-05	0.00025		GO:0043412	P	macromolecule modification	41	2532	0.00029	0.0042
GO:0008152	P	metabolic process	177	12035	3.5e-09	1.4e-07		GO:0008152	P	metabolic process	150	12035	6e-07	2.3e-05
GO:0051704	P	multi-organism process	46	1631	1.7e-09	8.1e-08		GO:0051704	P	multi-organism process	37	1631	4.8e-07	2.1e-05
GO:0015979	P	photosynthesis	12	253	2.4e-05	0.0004		GO:0015979	P	photosynthesis	11	253	3.3e-05	0.00067
GO:0044238	P	primary metabolic process	141	9890	7.3e-06	0.00017		GO:0044238	P	primary metabolic process	119	9890	0.0002	0.0033
GO:0019538	P	protein metabolic process	73	4289	1.8e-05	0.00031		GO:0019538	P	protein metabolic process	61	4289	0.00028	0.0042
GO:0009628	P	response to abiotic stimulus	43	2022	1.1e-05	0.00023		GO:0009628	P	response to abiotic stimulus	41	2022	1.8e-06	5.4e-05
GO:0009607	P	response to biotic stimulus	40	1253	7.8e-10	4.4e-08		GO:0009607	P	response to biotic stimulus	33	1253	8.3e-08	4.4e-06
GO:0009719	P	response to endogenous stimulus	34	1732	0.00041	0.005		GO:0009719	P	response to endogenous stimulus	32	1732	0.00015	0.0029
GO:0009605	P	response to external stimulus	42	1582	5.1e-08	1.6e-06		GO:0009605	P	response to external stimulus	35	1582	1.8e-06	5.4e-05
GO:0050896	P	response to stimulus	120	6250	1.6e-12	1.5e-10		GO:0050896	P	response to stimulus	102	6250	3.9e-10	2.5e-08
GO:0006950	P	response to stress	87	3506	1.4e-14	1.9e-12		GO:0006950	P	response to stress	75	3506	1.6e-12	1.4e-10

## Sheet: title
table S1 Pairwise comparisons of glycoproteome profiles between NaCl and control groups in WT, mns1 mns2 and cgl1 background.
