# Supplementary material for: Comparative Label-Free Quantitative Proteomics Analysis Reveals the Essential Roles of N-Glycans in Salt Tolerance by Modulating Protein Abundance in Arabidopsis
Source: Front Plant Sci. 2021 Jul 2;12:646425. doi: 10.3389/fpls.2021.646425 (PMC8283305; doi:10.3389/fpls.2021.646425)
Supplement: Supplementary file 2 [file Table_2.xlsx]

## Sheet: wt
WT
Mock specific glycoproteins (3)		NaCl specific glycoproteins (11)
Gene ID	Protein Function	Gene ID	Protein Function
AT1G78060	Glycosyl hydrolase family protein	AT3G21630	CERK1, LYSM RLK1
AT1G47600	BGLU34, TGG4	AT3G20570	ENODL9
AT3G51800	ATG2, EBP1, ATEBP1	AT5G28510	BGLU24
		AT1G66150	TMK1
		AT1G01430	TBL25
		AT2G27190	PAP1
		AT1G07230	NPC1
		AT5G62220	GT18
		AT3G60020	ASK5
		AT5G52060	BAG1
		AT1G34130	STT3B

## Sheet: mns1mns2
mns1mns2
Mock specific glycoproteins (8)		NaCl specific glycoproteins (9)
Gene ID	Protein Function	Gene ID	Protein Function
AT2G03450	PAP9	AT1G21880	LYM1
AT1G65610	KOR2	AT1G51760	IAR3
AT1G65570	Pectin lyase-like superfamily protein	AT5G24770	VSP2
AT5G51750	SBT1.3	AT5G28510	BGLU24
AT2G30010	TBL45	AT2G28100	FUC1
AT2G27035	ENODL20	AT5G61820	unknown
AT5G55960	unknown	AT5G48450	sks3
AT5G64620	C/VIF2	AT3G17790	PAP17
		AT1G51870	protein kinase family protein

## Sheet: cgl1-3
cgl1-3
Mock specific glycoproteins (21)		NaCl specific glycoproteins (2)
Gene ID	Protein Function	Gene ID	Protein Function
AT3G44910	CHX12	AT1G05380	Acyl-CoA N-acyltransferase
AT1G11960	ERD family protein	AT2G41110	CAM2
AT5G08370	AGAL2
AT1G42470	Patched family protein
AT5G48450	sks3
AT5G47780	GAUT4
AT5G20590	TBL5
AT1G77510	PDI6
AT2G15390	FUT4
AT3G06150	unknown protein
AT2G38650	GAUT7
AT2G30010	TBL45
AT2G03220	FT1
AT2G20810	GAUT10
AT3G46290	HERK1
AT3G51800	ATG2
AT4G01750	RGXT2
AT2G30210	LAC3
AT3G02350	GAUT9
AT1G51840	protein kinase-related
AT4G28850	XTH26

## Sheet: title
table S2 Qualitative analyses of salt stress responsive glycoproteins
