# Supplementary material for: Comparative Label-Free Quantitative Proteomics Analysis Reveals the Essential Roles of N-Glycans in Salt Tolerance by Modulating Protein Abundance in Arabidopsis
Source: Front Plant Sci. 2021 Jul 2;12:646425. doi: 10.3389/fpls.2021.646425 (PMC8283305; doi:10.3389/fpls.2021.646425)
Supplement: Supplementary file 3 [file Table_3.xlsx]

## Sheet: total salt proteins GO
table S3 An integral GO analysis of total glycoproteins experiencing significantly abundance or existence changes
Total Salt Proteins, Gene IDs			GO term	Ontology	Description	Number in input list	Number in BG/Ref	p-value	FDR
quantified	qualified	quantified + qualified	GO:0005975	P	carbohydrate metabolic process	46	1144	6.2e-28	1.4e-25
AT1G03870	AT1G01430	AT1G01430	GO:0009056	P	catabolic process	29	1430	2.8e-10	3.2e-08
AT1G05070	AT1G05380	AT1G03870	GO:0006950	P	response to stress	43	3506	3.7e-08	2.8e-06
AT1G07230	AT1G07230	AT1G05070	GO:0008152	P	metabolic process	94	12035	8.2e-08	4.6e-06
AT1G08470	AT1G11960	AT1G05380	GO:0050896	P	response to stimulus	59	6250	5e-07	2.3e-05
AT1G09210	AT1G21880	AT1G07230	GO:0009987	P	cellular process	95	12771	9.2e-07	3.4e-05
AT1G09780	AT1G34130	AT1G07230	GO:0044238	P	primary metabolic process	78	9890	3.6e-06	0.00012
AT1G09870	AT1G42470	AT1G08470	GO:0016043	P	cellular component organization	29	2456	2.2e-05	0.0006
AT1G10950	AT1G47600	AT1G09210	GO:0009628	P	response to abiotic stimulus	25	2022	4.2e-05	0.0011
AT1G13900	AT1G51760	AT1G09780	GO:0009607	P	response to biotic stimulus	18	1253	9.2e-05	0.0021
AT1G17100	AT1G51840	AT1G09870	GO:0009605	P	response to external stimulus	20	1582	0.0002	0.0041
AT1G19370	AT1G51870	AT1G10950	GO:0016049	P	cell growth	9	428	0.00044	0.0082
AT1G21270	AT1G65570	AT1G11960	GO:0042592	P	homeostatic process	10	542	0.00058	0.01
AT1G28290	AT1G65610	AT1G13900	GO:0003824	F	catalytic activity	101	9101	6.3e-20	2.9e-18
AT1G28340	AT1G66150	AT1G17100	GO:0016787	F	hydrolase activity	47	3279	3.7e-11	8.5e-10
AT1G41830	AT1G77510	AT1G19370	GO:0016740	F	transferase activity	40	3791	6e-06	9.1e-05
AT1G42970	AT1G78060	AT1G21270	GO:0004872	F	receptor activity	7	209	0.00013	0.0012
AT1G52400	AT2G03220	AT1G21880	GO:0060089	F	molecular transducer activity	7	209	0.00013	0.0012
AT1G52410	AT2G03450	AT1G28290	GO:0005576	C	extracellular region	74	2954	9.3e-34	1.5e-31
AT1G56340	AT2G15390	AT1G28340	GO:0012505	C	endomembrane system	54	2143	1.5e-23	1.2e-21
AT1G59970	AT2G20810	AT1G34130	GO:0005773	C	vacuole	43	1359	4.3e-22	2.4e-20
AT1G65590	AT2G27035	AT1G41830	GO:0030312	C	external encapsulating structure	32	706	9.3e-21	3.1e-19
AT1G66970	AT2G27190	AT1G42470	GO:0005618	C	cell wall	32	706	9.3e-21	3.1e-19
AT1G67490	AT2G28100	AT1G42970	GO:0016020	C	membrane	96	8532	8.8e-19	2.4e-17
AT1G68560	AT2G30010	AT1G47600	GO:0005783	C	endoplasmic reticulum	28	895	2.8e-14	6.7e-13
AT1G71220	AT2G30010	AT1G51760	GO:0005794	C	Golgi apparatus	28	1182	1.9e-11	3.9e-10
AT1G73080	AT2G30210	AT1G51840	GO:0005886	C	plasma membrane	47	3735	2.8e-09	5.2e-08
AT1G74380	AT2G38650	AT1G51870	GO:0005768	C	endosome	15	405	4.8e-09	7.9e-08
AT1G74790	AT2G41110	AT1G52400	GO:0044422	C	organelle part	52	4894	8.9e-08	1.2e-06
AT1G76160	AT3G02350	AT1G52410	GO:0044446	C	intracellular organelle part	52	4882	8.3e-08	1.2e-06
AT1G76400	AT3G06150	AT1G56340	GO:0044444	C	cytoplasmic part	86	10923	5.3e-07	6.8e-06
AT1G78680	AT3G17790	AT1G59970	GO:0044464	C	cell part	134	22662	7.3e-05	0.00082
AT1G79340	AT3G20570	AT1G65570	GO:0005623	C	cell	134	22664	7.4e-05	0.00082
AT2G01270	AT3G21630	AT1G65590	GO:0005737	C	cytoplasm	89	13406	0.00063	0.0065
AT2G01310	AT3G44910	AT1G65610
AT2G04780	AT3G46290	AT1G66150
AT2G12400	AT3G51800	AT1G66970
AT2G28470	AT3G51800	AT1G67490
AT2G33530	AT3G60020	AT1G68560
AT2G35610	AT4G01750	AT1G71220
AT2G35780	AT4G28850	AT1G73080
AT2G38960	AT5G08370	AT1G74380
AT2G39730	AT5G20590	AT1G74790
AT2G39780	AT5G24770	AT1G76160
AT2G44450	AT5G28510	AT1G76400
AT3G07390	AT5G28510	AT1G77510
AT3G07770	AT5G47780	AT1G78060
AT3G09090	AT5G48450	AT1G78680
AT3G11650	AT5G48450	AT1G79340
AT3G13410	AT5G51750	AT2G01270
AT3G14210	AT5G52060	AT2G01310
AT3G14210	AT5G55960	AT2G03220
AT3G14310	AT5G61820	AT2G03450
AT3G15950	AT5G62220	AT2G04780
AT3G16860	AT5G64620	AT2G12400
AT3G17840		AT2G15390
AT3G18080		AT2G20810
AT3G26650		AT2G27035
AT3G26720		AT2G27190
AT3G49110		AT2G28100
AT3G51740		AT2G28470
AT3G52850		AT2G30010
AT3G54960		AT2G30010
AT3G56750		AT2G30210
AT3G62020		AT2G33530
AT3G62730		AT2G35610
AT4G01080		AT2G35780
AT4G02980		AT2G38650
AT4G12880		AT2G38960
AT4G20110		AT2G39730
AT4G22130		AT2G39780
AT4G24670		AT2G41110
AT4G27080		AT2G44450
AT4G33220		AT3G02350
AT4G33430		AT3G06150
AT4G37800		AT3G07390
AT4G39640		AT3G07770
AT5G06860		AT3G09090
AT5G06870		AT3G11650
AT5G13640		AT3G13410
AT5G14030		AT3G14210
AT5G15350		AT3G14210
AT5G19690		AT3G14310
AT5G21105		AT3G15950
AT5G23210		AT3G16860
AT5G25980		AT3G17790
AT5G26000		AT3G17840
AT5G37780		AT3G18080
AT5G48380		AT3G20570
AT5G49720		AT3G21630
AT5G55730		AT3G26650
AT5G58100		AT3G26720
AT5G62630		AT3G44910
AT5G63810		AT3G46290
AT5G63910		AT3G49110
AT5G64570		AT3G51740
AT5G67400		AT3G51800
ATCG00480		AT3G51800
ATCG00680		AT3G52850
		AT3G54960
		AT3G56750
		AT3G60020
		AT3G62020
		AT3G62730
		AT4G01080
		AT4G01750
		AT4G02980
		AT4G12880
		AT4G20110
		AT4G22130
		AT4G24670
		AT4G27080
		AT4G28850
		AT4G33220
		AT4G33430
		AT4G37800
		AT4G39640
		AT5G06860
		AT5G06870
		AT5G08370
		AT5G13640
		AT5G14030
		AT5G15350
		AT5G19690
		AT5G20590
		AT5G21105
		AT5G23210
		AT5G24770
		AT5G25980
		AT5G26000
		AT5G28510
		AT5G28510
		AT5G37780
		AT5G47780
		AT5G48380
		AT5G48450
		AT5G48450
		AT5G49720
		AT5G51750
		AT5G52060
		AT5G55730
		AT5G55960
		AT5G58100
		AT5G61820
		AT5G62220
		AT5G62630
		AT5G63810
		AT5G63910
		AT5G64570
		AT5G64620
		AT5G67400
		ATCG00480
		ATCG00680
