# Supplementary material for: Comparative Label-Free Quantitative Proteomics Analysis Reveals the Essential Roles of N-Glycans in Salt Tolerance by Modulating Protein Abundance in Arabidopsis
Source: Front Plant Sci. 2021 Jul 2;12:646425. doi: 10.3389/fpls.2021.646425 (PMC8283305; doi:10.3389/fpls.2021.646425)
Supplement: Supplementary file 4 [file Table_4.xlsx]

## Sheet: enrichment.KEGG
Table S4	KEGG pathway analysis of significantly altered proteins under salt stress.
#term ID	term description	observed gene count	background gene count	false discovery rate	matching proteins in your network (IDs)	matching proteins in your network (labels)
WT
ath04141	Protein processing in endoplasmic reticulum	12	205	1.13e-12	AT1G34130.1,AT1G52260.1,AT1G61790.1,AT1G67490.1,AT1G71220.2,AT1G76400.1,AT2G01720.1,AT3G54960.1,AT3G60020.1,AT4G21150.1,AT5G19690.1,AT5G66680.1	AT1G61790,AT1G76400,AT2G01720,DGL1,EBS1,GCS1,HAP6,PDIL1-3,PDIL1-5,SK5,STT3A,STT3B
ath00510	N-Glycan biosynthesis	8	44	2.68e-12	AT1G34130.1,AT1G61790.1,AT1G67490.1,AT1G76400.1,AT2G01720.1,AT4G21150.1,AT5G19690.1,AT5G66680.1	AT1G61790,AT1G76400,AT2G01720,DGL1,GCS1,HAP6,STT3A,STT3B
ath01100	Metabolic pathways	14	1899	0.00042	AT1G07230.1,AT1G32060.1,AT1G34130.1,AT1G61790.1,AT1G67490.1,AT1G76400.1,AT2G01720.1,AT2G44450.1,AT3G49120.1,AT4G21150.1,AT5G19690.1,AT5G21100.1,AT5G28510.1,AT5G66680.1	AT1G61790,AT1G76400,AT2G01720,AT5G21100,BGLU15,BGLU24,DGL1,GCS1,HAP6,NPC1,PRK,PRXCB,STT3A,STT3B
ath00940	Phenylpropanoid biosynthesis	3	167	0.0338	AT2G44450.1,AT3G49120.1,AT5G28510.1	BGLU15,BGLU24,PRXCB
ath00460	Cyanoamino acid metabolism	2	67	0.0434	AT2G44450.1,AT5G28510.1	BGLU15,BGLU24
mns1 mns2
ath01100	Metabolic pathways	11	1899	0.0142	AT1G07230.1,AT1G23310.1,AT1G32060.1,AT1G67490.1,AT3G17790.1,AT3G18080.1,AT4G24670.2,AT4G33220.1,AT5G28510.1,ATCG00470.1,ATCG00480.1	ATPE,BGLU24,BGLU44,GCS1,GGAT1,NPC1,PAP17,PB,PME44,PRK,TAR2
cgl1
ath00190	Oxidative phosphorylation	6	149	2.24e-08	AT3G52300.1,ATCG00120.1,ATCG00130.1,ATCG00470.1,ATCG00480.1,ATMG01190.1	ATP1,ATPA,ATPE,ATPF,ATPQ,PB
ath01100	Metabolic pathways	11	1899	2.49e-07	AT1G67490.1,AT3G14310.1,AT3G32980.1,AT3G52300.1,AT5G21100.1,AT5G28510.1,ATCG00120.1,ATCG00130.1,ATCG00470.1,ATCG00480.1,ATMG01190.1	AT3G32980,AT5G21100,ATP1,ATPA,ATPE,ATPF,ATPQ,BGLU24,GCS1,PB,PME3
ath00195	Photosynthesis	4	76	1.93e-06	ATCG00120.1,ATCG00130.1,ATCG00470.1,ATCG00480.1	ATPA,ATPE,ATPF,PB
ath00940	Phenylpropanoid biosynthesis	2	167	0.0275	AT3G32980.1,AT5G28510.1	AT3G32980,BGLU24
