# Supplementary material for: Comparative Label-Free Quantitative Proteomics Analysis Reveals the Essential Roles of N-Glycans in Salt Tolerance by Modulating Protein Abundance in Arabidopsis
Source: Front Plant Sci. 2021 Jul 2;12:646425. doi: 10.3389/fpls.2021.646425 (PMC8283305; doi:10.3389/fpls.2021.646425)
Supplement: Supplementary file 6 [file Data_Sheet_2.xlsx]

## Sheet: WT
Fasta headers	iBAQ T1	iBAQ T2	iBAQ T3	iBAQ NT1	iBAQ NT2	iBAQ NT3	Ratio(T/NT)	T-test P value	SD	R1	R2	R3
>AT3G49120.1 | Symbols: ATPERX34, PERX34, PRXCB, ATPCB, PRX34 | peroxidase CB | chr3:18207819-18210041 FORWARD LENGTH=353	51883000	48325000	374350000, abnormal value	18503000	62727000	47140000	1.17093	0.692239	0.0587961	1.2125	1.12935
>AT3G32980.1 | Symbols: PRX32, ATPRX32, peroxidase superfamily protein	4892600	2956300	2600600		3297200	5206300	0.819231	0.55577	0.290114	1.15073	0.695314	0.611654
>AT2G28470.1 | Symbols: BGAL8 | beta-galactosidase 8 | chr2:12169047-12173164 REVERSE LENGTH=852	3479000	3149400	3296500	1141400	1334300		2.67262	0.000707335	0.13339	2.81052	2.54425	2.66309
>ATCG00680.1 | Symbols: PSBB | photosystem II reaction center protein B | chrC:72371-73897 FORWARD LENGTH=508	25227000	14781000	16296000	62633000		55797000	0.316947	0.00376417	0.0953258	0.426024	0.249616	0.275201
>AT1G13900.1 | Symbols: | Purple acid phosphatases superfamily protein | chr1:4753494-4755554 REVERSE LENGTH=656	2436100		2426800	759280		531940	3.76613	0.00403366	2.17439	3.77333	0	3.75893
>AT3G62730.1 | Symbols: | unknown protein; FUNCTIONS IN: molecular_function unknown; INVOLVED IN: biological_process unknown; LOCATED IN: endomembrane system; EXPRESSED IN: 13 plant structures; EXPRESSED DURING: LP.04 four leaves visible, 4 anthesis, LP.0	3700800	4537300	4032700		1339200	710080	3.99191	0.00434772	0.411082	3.61181	4.42819	3.93572
>AT1G09210.1 | Symbols: CRT1b, AtCRT1b | calreticulin 1b | chr1:2973217-2976655 REVERSE LENGTH=424	864370	894630	1115600	8252400	4920200	8266500	0.134082	0.00517216	0.0191915	0.120952	0.125187	0.156107
>AT3G14210.1 | Symbols: ESM1 | epithiospecifier modifier 1 | chr3:4729886-4731562 FORWARD LENGTH=392	557510000	503220000	444300000	162860000	243270000	300100000	2.13108	0.0066572	0.24052	2.36825	2.13763	1.88735
>AT2G38960.2 | Symbols: AERO2, ERO2 | endoplasmic reticulum oxidoreductins 2 | chr2:16265455-16267792 FORWARD LENGTH=478;>AT1G72280.1 | Symbols: AERO1, ERO1 | endoplasmic reticulum oxidoreductins 1 | chr1:27212039-27214506 REVERSE LENGTH=469	2461200	2414500			1240400	1003400	2.17297	0.0083187	1.25473	2.19378	2.15215	0
>AT1G28340.1 | Symbols: AtRLP4, RLP4 | receptor like protein 4 | chr1:9940175-9943252 FORWARD LENGTH=626	3447600	2976500	2502900	1160200	883040	1750500	2.35309	0.010212	0.373524	2.72628	2.35375	1.97923
>AT1G73080.1 | Symbols: PEPR1, ATPEPR1 | PEP1 receptor 1 | chr1:27484513-27488021 FORWARD LENGTH=1123	6450100	6683500	4909400	2969600	3118600	3970200	1.79382	0.014004	0.287518	1.9238	1.99341	1.46427
>AT5G62630.1 | Symbols: HIPL2 | hipl2 protein precursor | chr5:25143719-25146390 REVERSE LENGTH=696	13533000	18566000	19523000	3900300		5339700	3.72453	0.0144093	0.696503	2.92922	4.01861	4.22576
>AT2G12400.1 | Symbols: | unknown protein; FUNCTIONS IN: molecular_function unknown; INVOLVED IN: biological_process unknown; LOCATED IN: endomembrane system; EXPRESSED IN: 25 plant structures; EXPRESSED DURING: 13 growth stages; BEST Arabidopsis thaliana	30711000	29771000	38332000	3081800		12517000	4.22315	0.0148371	0.60196	3.93761	3.81709	4.91474
>AT5G49720.1 | Symbols: ATGH9A1, TSD1, DEC, KOR, RSW2, IRX2, KOR1, GH9A1 | glycosyl hydrolase 9A1 | chr5:20197765-20200168 REVERSE LENGTH=621	26233000	26846000	23453000	7361200	10512000	18063000	2.12966	0.0154941	0.150947	2.18996	2.24114	1.95789
>AT2G39780.1 | Symbols: RNS2 | ribonuclease 2 | chr2:16591256-16593515 FORWARD LENGTH=259	16334000	12920000	12760000	9100100	5493600	3566100	2.31357	0.0163849	0.333514	2.69838	2.13438	2.10795
>AT1G78680.1 | Symbols: ATGGH2, GGH2 | gamma-glutamyl hydrolase 2 | chr1:29593933-29596037 FORWARD LENGTH=347	8939500	5368800	8683200	2534000	1994600	3879900	2.73432	0.0191066	0.710597	3.18945	1.91549	3.09801
>AT5G15350.1 | Symbols: ENODL17, AtENODL17 | early nodulin-like protein 17 | chr5:4985184-4986154 REVERSE LENGTH=172	20616000	21046000		12715000		14710000	1.51912	0.0199356	0.877207	1.50345	1.5348	0
>AT1G74790.1 | Symbols: | catalytics | chr1:28098912-28101673 FORWARD LENGTH=695	14704000	16054000		3846000		6556500	2.95679	0.0214211	1.71203	2.82701	3.08657	0
>AT5G19690.1 | Symbols: STT3A | staurosporin and temperature sensitive 3-like A | chr5:6652649-6658214 FORWARD LENGTH=779	2244800	1927400		994090	1065900		2.02535	0.0229236	1.17944	2.17943	1.87127	0
>AT3G62020.2 | Symbols: GLP10 | germin-like protein 10 | chr3:22971443-22972018 REVERSE LENGTH=191	8149300		6501700	1726400		2193500	3.7376	0.0245343	2.19846	4.15791	0	3.31728
>AT5G21105.1 | Symbols: | Plant L-ascorbate oxidase | chr5:7172727-7177409 FORWARD LENGTH=588	11011000	9153400		3120600	5273100	5921600	2.11289	0.0261688	1.23531	2.30753	1.91824	0
>AT1G76400.1 | Symbols: | Ribophorin I | chr1:28658713-28661672 REVERSE LENGTH=614	12523000	16887000		4949200	6937700	7923400	2.22687	0.0263892	1.32747	1.89644	2.55731	0
>AT3G51740.1 | Symbols: IMK2 | inflorescence meristem receptor-like kinase 2 | chr3:19189248-19191842 FORWARD LENGTH=836	2454000		3366400	329360	939550	1342900	3.34274	0.028048	1.9998	2.81873	0	3.86674
>AT4G33430.1 | Symbols: BAK1, RKS10, SERK3, ELG, ATSERK3, ATBAK1 | BRI1-associated receptor kinase | chr4:16086654-16090288 REVERSE LENGTH=615	5900200	3312900	4542000	2010200	400090	2073700	3.0676	0.0289436	0.865872	3.94751	2.21649	3.03881
>AT2G39730.1 | Symbols: RCA | rubisco activase | chr2:16570951-16573345 REVERSE LENGTH=474	596620000	609630000		270830000	128400000		3.02144	0.0300019	1.74473	2.98885	3.05403	0
>AT1G52410.1 | Symbols: TSA1 | TSK-associating protein 1 | chr1:19520762-19525361 FORWARD LENGTH=755	12890000	11549000	8255500	699140	4184000	6463800	2.88135	0.0304888	0.630517	3.40797	3.05342	2.18266
>AT5G63910.1 | Symbols: FCLY | farnesylcysteine lyase | chr5:25572053-25574077 REVERSE LENGTH=500	3334600	4368500		792100		1017700	4.25633	0.0307633	2.52292	3.68505	4.82761	0
>AT5G26000.2 | Symbols: TGG1, BGLU38 | thioglucoside glucohydrolase 1 | chr5:9080009-9082347 REVERSE LENGTH=456	604700000	604250000	706450000	272950000		435110000	1.80343	0.0318215	0.166302	1.70805	1.70678	1.99545
>AT3G26650.1 | Symbols: GAPA, GAPA-1 | glyceraldehyde 3-phosphate dehydrogenase A subunit | chr3:9795226-9796848 FORWARD LENGTH=396	17641000	7218200	7046400	29593000		44102000	0.288627	0.0338436	0.164674	0.478757	0.195894	0.191231
>AT5G13640.1 | Symbols: ATPDAT, PDAT, PDAT1 | phospholipid:diacylglycerol acyltransferase | chr5:4393529-4397213 FORWARD LENGTH=671	13374000	16216000		6233200	4429500	9640000	2.18616	0.0371321	1.27953	1.97619	2.39613	0
>AT5G14030.1 | Symbols: | translocon-associated protein beta (TRAPB) family protein | chr5:4526878-4528253 FORWARD LENGTH=195	45614000	34485000		80477000	80382000	60212000	0.543484	0.0397576	0.322739	0.618996	0.467972	0
>AT1G52400.1 | Symbols: BGL1, BGLU18, ATBG1 | beta glucosidase 18 | chr1:19515250-19517930 FORWARD LENGTH=528	39675000	32246000		11406000	16614000		2.56677	0.0401543	1.50546	2.83191	2.30164	0
>AT5G63810.1 | Symbols: BGAL10 | beta-galactosidase 10 | chr5:25537242-25541315 FORWARD LENGTH=741	42675000	39278000		18603000		25656000	1.85167	0.0405285	1.07181	1.92842	1.77492	0
>AT1G56340.1 | Symbols: CRT1, CRT1a, AtCRT1a | calreticulin 1a | chr1:21090059-21092630 REVERSE LENGTH=425	280070000	316870000			110870000	167700000	2.14287	0.0423706	1.24422	2.01077	2.27498	0
>AT2G35780.1 | Symbols: scpl26 | serine carboxypeptidase-like 26 | chr2:15037733-15040104 REVERSE LENGTH=452	23750000	19117000	15136000	10999000	13636000	10188000	1.66565	0.0457457	0.371402	2.04606	1.64693	1.30397
>AT1G09780.1 | Symbols: | Phosphoglycerate mutase, 2,3-bisphosphoglycerate-independent | chr1:3165550-3167812 REVERSE LENGTH=557	3271300	1211100	1817500	5104800		8129300	0.317357	0.0463255	0.160003	0.494374	0.183027	0.274669
>AT3G54960.1 | Symbols: ATPDIL1-3, PDI1, ATPDI1, PDIL1-3 | PDI-like 1-3 | chr3:20363514-20366822 REVERSE LENGTH=579	43426000	35318000		22028000	13365000	26307000	1.91436	0.0471453	1.1227	2.11147	1.71724	0
>AT1G79340.1 | Symbols: AtMC4, MC4 | metacaspase 4 | chr1:29842849-29844368 FORWARD LENGTH=418	8381100	6382300	6467700	4094900	1379600	5030600	2.02103	0.0485578	0.322747	2.39344	1.82263	1.84702
>AT1G71220.1 | Symbols: EBS1, UGGT, PSL2 | UDP-glucose:glycoprotein glucosyltransferases;transferases, transferring hexosyl groups;transferases, transferring glycosyl groups | chr1:26841664-26851730 FORWARD LENGTH=1613	9084500	6318400		1597800	2171900	4529700	2.78386	0.0499806	1.68322	3.28379	2.28392	0
>AT1G78830.1 | Symbols: | Curculin-like (mannose-binding) lectin family protein | chr1:29637141-29638508 REVERSE LENGTH=455	174080000	155470000	275500000	73770000	126530000	133310000	1.81364	0.0962574	0.580925	1.56542	1.39807	2.47744
>AT5G33290.1 | Symbols: XGD1 | xylogalacturonan deficient 1 | chr5:12558439-12561840 FORWARD LENGTH=500	2257500	1993200			1677700	1271700	1.44121	0.115143	0.836894	1.53082	1.3516	0
>AT1G55120.1 | Symbols: ATFRUCT5, AtcwINV3, FRUCT5 | beta-fructofuranosidase 5 | chr1:20566617-20569165 FORWARD LENGTH=594	1586000	1034900		410970		648880	2.4729	0.121493	1.51947	2.99288	1.95292	0
>AT1G05070.1 | Symbols: | Protein of unknown function (DUF1068) | chr1:1457172-1458531 REVERSE LENGTH=184	4685100	2944100	6709200		1570800	1999100	2.67765	0.124364	1.05567	2.62478	1.6494	3.75876
>AT1G51470.1 | Symbols: BGLU35, TGG5 | beta glucosidase 35 | chr1:19087424-19090248 FORWARD LENGTH=511	89631000	85775000	75898000	44173000	75839000	69959000	1.32285	0.124671	0.111855	1.41544	1.35455	1.19857
>AT3G56310.2 | Symbols: | Melibiase family protein | chr3:20882886-20885745 FORWARD LENGTH=413	2569900	1629800	4003400		982390	788690	3.0878	0.130445	1.34982	2.90207	1.84046	4.52086
>AT1G15000.1 | Symbols: scpl50 | serine carboxypeptidase-like 50 | chr1:5168613-5169947 FORWARD LENGTH=444	4307000	2984500	2086300	1028200		1809000	2.20353	0.14833	0.787456	3.03609	2.10383	1.47068
>AT1G09870.1 | Symbols: | histidine acid phosphatase family protein | chr1:3205817-3208444 FORWARD LENGTH=487	14982000		40224000	15530000	5587200	4129900	3.27994	0.164596	2.41559	1.78024	0	4.77964
>AT3G18080.1 | Symbols: BGLU44 | B-S glucosidase 44 | chr3:6191586-6194124 FORWARD LENGTH=512;>AT3G18070.1 | Symbols: BGLU43 | beta glucosidase 43 | chr3:6187294-6189947 FORWARD LENGTH=501	3115000	2528900	6289200	1939600	594260	2874700	2.20634	0.180559	1.1222	1.72782	1.40272	3.48847
>AT5G43600.1 | Symbols: ATAAH-2, UAH | ureidoglycolate amidohydrolase | chr5:17512651-17515280 FORWARD LENGTH=476	10472000	5735500	3569200	1164700	2024000	5156200	2.36991	0.18341	1.26913	3.76469	2.06192	1.28313
>AT5G55480.1 | Symbols: SVL1 | SHV3-like 1 | chr5:22474277-22477819 FORWARD LENGTH=766	5458400	10736000	25084000	826940	8682700	1602900	3.71458	0.18981	2.7418	1.47358	2.89835	6.77181
>AT1G52030.2 | Symbols: MBP2, MBP1.2, F-ATMBP | myrosinase-binding protein 2 | chr1:19346090-19348282 REVERSE LENGTH=642	3048800	2330400	1360400	328910	2040400	1132800	1.92444	0.195694	0.725836	2.61168	1.99628	1.16535
>AT5G60360.1 | Symbols: SAG2, AALP, ALP | aleurain-like protease | chr5:24280044-24282152 FORWARD LENGTH=358	2914000	2577600	1653400	1085200	2045700	1865600	1.43	0.208776	0.391919	1.74962	1.54764	0.992735
>AT1G10850.1 | Symbols: | Leucine-rich repeat protein kinase family protein | chr1:3612228-3614343 FORWARD LENGTH=663		1550300	2941800	778460	1905100	859510	1.90178	0.224872	1.24605	0	1.31268	2.49089
>AT2G25060.1 | Symbols: ENODL14, AtENODL14 | early nodulin-like protein 14 | chr2:10662308-10662930 FORWARD LENGTH=182	13888000	9639400	40085000	6153200	3635100	12115000	2.90424	0.230798	2.25839	1.90218	1.32027	5.49027
>AT1G28290.1 | Symbols: AGP31 | arabinogalactan protein 31 | chr1:9889331-9890843 REVERSE LENGTH=359	6720800	4186400	17136000	3309900	809210	6050900	2.75744	0.232828	2.02444	1.98253	1.23493	5.05486
>AT4G37300.1 | Symbols: MEE59 | maternal effect embryo arrest 59 | chr4:17554805-17555498 FORWARD LENGTH=173	1734000		485780	1994100		3962500	0.372659	0.250069	0.300339	0.582211	0	0.163106
>AT1G78820.1 | Symbols: | D-mannose binding lectin protein with Apple-like carbohydrate-binding domain | chr1:29634401-29635768 REVERSE LENGTH=455	1238900		30190000	566840	426650	869740	25.3019	0.256349	27.5067	1.99476	0	48.6091
>AT1G61900.1 | Symbols: | unknown protein; FUNCTIONS IN: molecular_function unknown; INVOLVED IN: biological_process unknown; LOCATED IN: anchored to plasma membrane, plasma membrane, anchored to membrane; EXPRESSED IN: 23 plant structures; EXPRESSED DURI	9487600	5538300	30325000	3171100	6426400	5381600	3.02761	0.261427	2.66727	1.90017	1.10921	6.07346
>AT3G26720.1 | Symbols: | Glycosyl hydrolase family 38 protein | chr3:9816707-9823056 FORWARD LENGTH=1019	17366000	23352000	9768200	9494300	9656900	14768000	1.48843	0.26791	0.602121	1.53594	2.06538	0.863953
>AT1G02335.1 | Symbols: GL22 | germin-like protein subfamily 2 member 2 precursor | chr1:463979-464876 REVERSE LENGTH=219;>AT1G09560.1 | Symbols: GLP5 | germin-like protein 5 | chr1:3093896-3094639 FORWARD LENGTH=219		5008100	2649800	2564700	2978100	2160300	1.4912	0.268182	0.975762	0	1.95042	1.03197
>AT3G17840.1 | Symbols: RLK902 | receptor-like kinase 902 | chr3:6106092-6108430 FORWARD LENGTH=647	793320		12095000	974080	392280	1475200	6.80347	0.284724	7.14292	0.837554	0	12.7694
>AT2G14740.1 | Symbols: ATVSR3, VSR3, VSR2;2, BP80-2;2 | vaculolar sorting receptor 3 | chr2:6308895-6312303 FORWARD LENGTH=628;>AT2G14720.1 | Symbols: VSR4, VSR2;1, BP80-2;1, MTV4 | vacuolar sorting receptor 4 | chr2:6300878-6304156 REVERSE LENGTH=628	2244200	2429400	14873000	550240	1335200	2393000	4.56863	0.293579	5.07547	1.57361	1.70347	10.4288
>AT3G60130.1 | Symbols: BGLU16 | beta glucosidase 16 | chr3:22210343-22213650 FORWARD LENGTH=514	2125600	2187000	1780600	563810	1547100	2219100	1.4072	0.302486	0.151782	1.4727	1.51524	1.23367
>AT3G06300.1 | Symbols: AT-P4H-2 | P4H isoform 2 | chr3:1907744-1909675 FORWARD LENGTH=299		3600300	6047100		3504400	2659000	1.56527	0.310623	0.987063	0	1.16828	1.96226
>AT1G21750.1 | Symbols: ATPDIL1-1, ATPDI5, PDI5, PDIL1-1 | PDI-like 1-1 | chr1:7645767-7648514 FORWARD LENGTH=501	47841000	26471000	11994000	21047000	12099000	16413000	1.74148	0.317234	1.09165	2.896	1.60239	0.726044
>AT3G51730.1 | Symbols: | saposin B domain-containing protein | chr3:19186970-19188436 FORWARD LENGTH=213	4742300	5622300	44812000	1759800	5409900	2927300	5.46465	0.320314	6.79938	1.40902	1.67049	13.3144
>AT5G06320.1 | Symbols: NHL3 | NDR1/HIN1-like 3 | chr5:1931016-1931711 REVERSE LENGTH=231		2675900	32941000	1274700	9765700	1115600	4.39498	0.330252	4.51506	0	0.66039	8.12957
>AT1G27950.1 | Symbols: LTPG1 | glycosylphosphatidylinositol-anchored lipid protein transfer 1 | chr1:9740740-9741991 FORWARD LENGTH=193	9056000	13296000	117810000	1702900	11296000	11712000	5.67207	0.341903	7.47868	1.09943	1.61419	14.3026
>AT5G34940.1 | Symbols: AtGUS3, GUS3 | glucuronidase 3 | chr5:13235912-13237799 REVERSE LENGTH=401	9594900	16342000	2757600	2705200	7425000	5158300	1.87687	0.342348	1.33282	1.88277	3.20672	0.541113
>AT1G41830.1 | Symbols: SKS6 | SKU5-similar 6 | chr1:15603892-15607802 REVERSE LENGTH=542	18538000	9448000	11960000		8258400	10589000	1.41296	0.359412	0.498118	1.96717	1.00258	1.26914
>AT4G26690.1 | Symbols: SHV3, MRH5, GPDL2 | PLC-like phosphodiesterase family protein | chr4:13456793-13459890 REVERSE LENGTH=759	19534000	18629000	102730000	15434000	25333000	12916000	2.62454	0.359952	2.69899	1.09163	1.04106	5.74092
>AT4G16120.1 | Symbols: ATSEB1, COBL7, SEB1 | COBRA-like protein-7 precursor | chr4:9116591-9119138 REVERSE LENGTH=661	3984700	1661900	6894600	1779100	3923500	1659300	1.70353	0.362958	1.06841	1.62378	0.67723	2.80957
>AT3G14920.1 | Symbols: | Peptide-N4-(N-acetyl-beta-glucosaminyl)asparagine amidase A protein | chr3:5018275-5020104 FORWARD LENGTH=609	2278400	1073300	3700500	1302500	1351800		1.77126	0.373181	0.990915	1.71676	0.808725	2.78831
>AT1G53840.1 | Symbols: ATPME1, PME1 | pectin methylesterase 1 | chr1:20101533-20103458 FORWARD LENGTH=586	1748700	1159100	26481000	2593500	1738600	824170	5.69962	0.38864	8.40864	1.01742	0.674383	15.4071
>AT3G11130.1 | Symbols: | Clathrin, heavy chain | chr3:3482575-3491667 REVERSE LENGTH=1705		136920	114180	452270	62278	1379700	0.198839	0.389867	0.116203	0	0.216846	0.180832
>AT1G42970.1 | Symbols: GAPB | glyceraldehyde-3-phosphate dehydrogenase B subunit | chr1:16127552-16129584 FORWARD LENGTH=447	13661000	3578300	2236100	13560000	2743400	23085000	0.494445	0.390164	0.475638	1.04048	0.27254	0.170312
>AT1G66970.1 | Symbols: SVL2 | SHV3-like 2 | chr1:24992746-24996005 REVERSE LENGTH=763	531160	2000100	15218000	399830	2619300	1196300	4.21055	0.392852	5.75658	0.378011	1.42341	10.8302
>AT5G64570.1 | Symbols: XYL4, ATBXL4 | beta-D-xylosidase 4 | chr5:25810227-25813309 REVERSE LENGTH=784	762590		12496000		337350	315060	20.3225	0.395067	21.4737	2.33776	0	38.3072
>AT3G09220.1 | Symbols: LAC7 | laccase 7 | chr3:2827434-2830477 REVERSE LENGTH=567	10277000	3259800	2151600	3035200	3885900	1161900	1.94091	0.395845	1.63538	3.8143	1.20987	0.798565
>AT3G52720.1 | Symbols: CAH1, ATACA1, ACA1 | alpha carbonic anhydrase 1 | chr3:19538804-19541116 REVERSE LENGTH=284		1378000	20286000		1129900	416860	14.0061	0.399082	14.6568	0	1.78179	26.2303
>AT2G04780.1 | Symbols: FLA7 | FASCICLIN-like arabinoogalactan 7 | chr2:1677488-1678252 FORWARD LENGTH=254	4840900		74708000		2265400	4097400	12.5022	0.404927	13.1406	1.52163	0	23.4827
>AT3G44330.1 | Symbols: | INVOLVED IN: protein processing; LOCATED IN: mitochondrion, endoplasmic reticulum, plasma membrane, vacuole; EXPRESSED IN: 25 plant structures; EXPRESSED DURING: 13 growth stages; CONTAINS InterPro DOMAIN/s: Nicalin (InterPro:IPR	12176000	6963300	2664000	1420500	2408600	8296200	1.79817	0.40743	1.17852	3.01254	1.72284	0.659118
>AT3G10740.1 | Symbols: ASD1, ARAF1, ARAF, ATASD1 | alpha-L-arabinofuranosidase 1 | chr3:3361031-3364573 REVERSE LENGTH=678	627040		4354500	1654000	862240	861970	2.21191	0.410414	2.09048	0.556839	0	3.86699
>AT1G28440.1 | Symbols: HSL1 | HAESA-like 1 | chr1:9996914-10000171 FORWARD LENGTH=996	771310	963820	708820	254080	643190	953510	1.3205	0.412564	0.215439	1.25025	1.56229	1.14895
>AT3G15950.1 | Symbols: NAI2 | DNA topoisomerase-related | chr3:5397783-5402610 REVERSE LENGTH=772	6134700	8063500	21172000	15427000	12330000	23384000	0.691621	0.412899	0.479969	0.35987	0.473016	1.24198
>AT4G39640.1 | Symbols: GGT1 | gamma-glutamyl transpeptidase 1 | chr4:18400608-18402861 FORWARD LENGTH=572	793890	556710	3039500	570640	1228400	320850	2.07091	0.416589	1.93894	1.12349	0.787838	4.3014
>AT5G22880.1 | Symbols: H2B, HTB2 | histone B2 | chr5:7652130-7652567 REVERSE LENGTH=145	8183400	8290700	5426400	5976000	6433400	26314000	0.565562	0.454033	0.125786	0.633989	0.642302	0.420397
>AT4G02770.1 | Symbols: PSAD-1 | photosystem I subunit D-1 | chr4:1229247-1229873 REVERSE LENGTH=208;>AT1G03130.1 | Symbols: PSAD-2 | photosystem I subunit D-2 | chr1:753528-754142 REVERSE LENGTH=204	10752000	7245400	641080	3551600	6820500	30884000	0.451775	0.454578	0.373322	0.781848	0.52686	0.0466171
>AT2G17120.1 | Symbols: LYM2 | lysm domain GPI-anchored protein 2 precursor | chr2:7459156-7460648 FORWARD LENGTH=350	4102800	931510	51996000	393690	1490900		20.1743	0.459166	30.3627	4.35405	0.988555	55.1802
>AT1G25570.1 | Symbols: | Di-glucose binding protein with Leucine-rich repeat domain | chr1:8992183-8995430 REVERSE LENGTH=628	473280	644890	14337000		427720	582610	10.1981	0.490443	15.7476	0.936882	1.27659	28.3808
>AT5G40170.1 | Symbols: AtRLP54, RLP54 | receptor like protein 54 | chr5:16065179-16067557 REVERSE LENGTH=792	236060	1268400	2910200	1107800	5633100	1417000	0.541152	0.492676	0.495935	0.0868091	0.466444	1.0702
>AT5G51550.1 | Symbols: EXL3 | EXORDIUM like 3 | chr5:20939793-20940806 REVERSE LENGTH=337	5066300	1898000	8392400	2122800	5399100	3180600	1.43487	0.502751	0.910307	1.42013	0.532025	2.35246
>AT1G06680.1 | Symbols: PSBP-1, OEE2, PSII-P, OE23 | photosystem II subunit P-1 | chr1:2047940-2049186 FORWARD LENGTH=263	55289000	34843000	25612000	47929000	19485000	109540000	0.654091	0.506376	0.257483	0.937345	0.590713	0.434215
>AT1G68560.1 | Symbols: ATXYL1, XYL1, TRG1 | alpha-xylosidase 1 | chr1:25734435-25737897 REVERSE LENGTH=915	1539400	462410	33378000	6621700	1317100	4242800	2.90436	0.517416	4.60547	0.379113	0.113879	8.2201
>AT1G61520.1 | Symbols: LHCA3 | photosystem I light harvesting complex gene 3 | chr1:22700152-22701149 FORWARD LENGTH=273	64737000	36491000	37744000	66183000	15173000	123750000	0.677562	0.537027	0.233417	0.946881	0.533739	0.552066
>AT4G27080.1 | Symbols: ATPDIL5-4, ATPDI7, PDI7, PDIL5-4 | PDI-like 5-4 | chr4:13589156-13593335 FORWARD LENGTH=480	7154000	6374200	13556000	2124000	9128100	9285400	1.31877	0.542139	0.575626	1.04502	0.931107	1.98018
>AT4G18760.1 | Symbols: AtRLP51, RLP51 | receptor like protein 51 | chr4:10308163-10309458 REVERSE LENGTH=431		2129800	24691000	2485600	7581000		2.66434	0.544117	2.7183	0	0.423142	4.90553
>AT4G37930.1 | Symbols: SHM1, STM, SHMT1 | serine transhydroxymethyltransferase 1 | chr4:17831891-17834742 REVERSE LENGTH=517	55158000	34238000	27891000	54828000	17258000	87817000	0.733488	0.553384	0.267683	1.03484	0.642352	0.523273
>AT1G19570.1 | Symbols: DHAR1, ATDHAR1, DHAR5 | dehydroascorbate reductase | chr1:6773462-6774413 REVERSE LENGTH=213	21407000	23611000	14887000	24805000	17137000	24876000	0.89654	0.563938	0.203678	0.961133	1.06009	0.668398
>AT1G77510.1 | Symbols: ATPDIL1-2, PDI6, ATPDI6, PDIL1-2 | PDI-like 1-2 | chr1:29126742-29129433 FORWARD LENGTH=508	840170	662730		319050		822190	1.3169	0.567754	0.776048	1.47238	1.16142	0
>AT1G08470.1 | Symbols: SSL3 | strictosidine synthase-like 3 | chr1:2682262-2683977 REVERSE LENGTH=390	9072900	10908000	3478800	1818900	8803600	7175100	1.31814	0.572313	0.65231	1.52935	1.83867	0.586394
>AT5G03260.1 | Symbols: LAC11 | laccase 11 | chr5:777198-779338 REVERSE LENGTH=557	8194400	2291000	1389600	2767900		1763000	1.74726	0.585607	1.63152	3.61712	1.01128	0.613388
>AT5G20480.1 | Symbols: EFR | EF-TU receptor | chr5:6922497-6925679 FORWARD LENGTH=1031	265730	538340	554050		311680	440520	1.20369	0.597174	0.431047	0.706541	1.43137	1.47315
>AT5G60640.1 | Symbols: ATPDIL1-4, PDI2, ATPDI2, PDIL1-4 | PDI-like 1-4 | chr5:24371141-24373993 REVERSE LENGTH=597	95742000	33033000	37553000	40762000	28285000	59739000	1.29151	0.602529	0.814685	2.23026	0.769486	0.874777
>AT1G79550.1 | Symbols: PGK | phosphoglycerate kinase | chr1:29924347-29926295 REVERSE LENGTH=401	6479300	4615800	12253000	9192300	4333500	17142000	0.761323	0.607527	0.389523	0.633821	0.451529	1.19862
>AT4G33740.2 | Symbols: | unknown protein; BEST Arabidopsis thaliana protein match is: unknown protein (TAIR:AT4G37820.1); Has 138092 Blast hits to 73110 proteins in 2951 species: Archae - 732; Bacteria - 17903; Metazoa - 48520; Fungi - 16808; Plants - 70	3589200	5809100	5649300	4400100	3587300	11072000	0.789511	0.617865	0.194882	0.56495	0.914368	0.889215
>ATCG00480.1 | Symbols: ATPB, PB | ATP synthase subunit beta | chrC:52660-54156 REVERSE LENGTH=498	88553000	37740000	23968000	44490000	22879000	156200000	0.672101	0.62151	0.45646	1.18826	0.506421	0.321619
>AT1G67830.1 | Symbols: ATFXG1, FXG1 | alpha-fucosidase 1 | chr1:25431705-25432972 REVERSE LENGTH=372	12247000	7974800	5800100		7922300	6817500	1.17694	0.635275	0.44503	1.66176	1.08208	0.786998
>AT1G42480.3 | Symbols: | unknown protein; FUNCTIONS IN: molecular_function unknown; INVOLVED IN: biological_process unknown; LOCATED IN: endomembrane system; EXPRESSED IN: 24 plant structures; EXPRESSED DURING: 13 growth stages; CONTAINS InterPro DOMAIN/	6547800	7348900	3914300	5689400	6095900	7930300	0.903396	0.637093	0.273426	0.996338	1.11824	0.595615
>AT3G52850.1 | Symbols: VSR1, BP-80, ATELP, BP80, BP80B, ATELP1, ATVSR1, GFS1, VSR1;1, BP80-1;1 | vacuolar sorting receptor homolog 1 | chr3:19587999-19591690 FORWARD LENGTH=623	1607600	820190	1069300	128000		1577300	1.36715	0.647269	0.472009	1.88542	0.96193	1.25409
>P00761 SWISS-PROT:P00761|TRYP_PIG Trypsin - Sus scrofa (Pig).	3940700	1751200		1470500	2412200	3127000	1.21801	0.65316	0.845004	1.68653	0.749476	0
>AT1G29930.1 | Symbols: CAB1, AB140, CAB140, LHCB1.3 | chlorophyll A/B binding protein 1 | chr1:10478071-10478874 FORWARD LENGTH=267;>AT1G29910.1 | Symbols: CAB3, AB180, LHCB1.2 | chlorophyll A/B binding protein 3 | chr1:10472443-10473246 REVERSE LENGTH=26	88958000	42209000	26675000	35866000	24892000	167740000	0.690781	0.659455	0.425636	1.16795	0.554171	0.350222
>AT1G73260.1 | Symbols: ATKTI1, KTI1 | kunitz trypsin inhibitor 1 | chr1:27547410-27548057 REVERSE LENGTH=215	856520	3592100		5022700	737910	3596100	0.713171	0.672916	0.60155	0.274622	1.15172	0
>AT5G11280.1 | Symbols: | unknown protein; BEST Arabidopsis thaliana protein match is: unknown protein (TAIR:AT1G80200.1); Has 30201 Blast hits to 17322 proteins in 780 species: Archae - 12; Bacteria - 1396; Metazoa - 17338; Fungi - 3422; Plants - 5037; V	9985900	18176000	10936000	6997100	12243000	15127000	1.13765	0.676886	0.391032	0.871697	1.58663	0.954634
>AT5G20630.1 | Symbols: GLP3, GLP3A, GLP3B, ATGER3, GER3 | germin 3 | chr5:6975315-6975950 REVERSE LENGTH=211	223010000	57206000	288790000	250080000	125900000	78578000	1.25178	0.679599	0.787608	1.47183	0.377549	1.90596
>AT2G30210.1 | Symbols: LAC3 | laccase 3 | chr2:12887735-12889827 REVERSE LENGTH=570	1033000	535150		963160	300890	672310	1.21477	0.684377	0.800387	1.60043	0.829107	0
>AT1G21270.1 | Symbols: WAK2 | wall-associated kinase 2 | chr1:7444997-7447345 FORWARD LENGTH=732	1476400	1203000	563630	512360	990050	1286000	1.16304	0.689052	0.504	1.58843	1.29429	0.606399
>AT3G20560.1 | Symbols: ATPDIL5-3, PDI12, ATPDI12, PDIL5-3 | PDI-like 5-3 | chr3:7182182-7186390 FORWARD LENGTH=483	7745600	7089000	4576700	2997000	8073800		1.16892	0.707566	0.302157	1.39928	1.28067	0.826806
>AT3G13410.1 | Symbols: | unknown protein; FUNCTIONS IN: molecular_function unknown; INVOLVED IN: biological_process unknown; LOCATED IN: endoplasmic reticulum; EXPRESSED IN: 25 plant structures; EXPRESSED DURING: 15 growth stages; BEST Arabidopsis thalia	1563100	1592200	2414000		532090	2528800	1.213	0.719691	0.315651	1.02134	1.04035	1.57732
>AT5G44130.1 | Symbols: FLA13 | FASCICLIN-like arabinogalactan protein 13 precursor | chr5:17761128-17761871 FORWARD LENGTH=247	1104800	7396100	11229000	3298100	2728100	21483000	0.717211	0.723469	0.557443	0.120483	0.806577	1.22457
>AT1G32060.1 | Symbols: PRK | phosphoribulokinase | chr1:11532668-11534406 FORWARD LENGTH=395	115070000	82860000	45708000	99663000	18928000	89652000	1.16997	0.733871	0.500046	1.65773	1.1937	0.658481
>AT3G07770.1 | Symbols: Hsp89.1, AtHsp90.6, AtHsp90-6 | HEAT SHOCK PROTEIN 89.1 | chr3:2479611-2483970 FORWARD LENGTH=799	1554300	426330	834020	1016900	1082800	1061300	0.89043	0.744338	0.542067	1.47513	0.404616	0.791541
>AT4G02980.1 | Symbols: ABP1, ABP | endoplasmic reticulum auxin binding protein 1 | chr4:1319902-1321449 REVERSE LENGTH=198	3753000	11423000	7358500	860980	22677000	5168700	0.784992	0.784314	0.401017	0.392208	1.19376	0.769002
>AT4G10340.1 | Symbols: LHCB5 | light harvesting complex of photosystem II 5 | chr4:6408200-6409496 FORWARD LENGTH=280	348690000	183210000	210420000	257010000	124900000	296590000	1.09406	0.785024	0.39234	1.54174	0.810066	0.930376
>AT1G75140.1 | Symbols: | unknown protein; LOCATED IN: endoplasmic reticulum; EXPRESSED IN: 24 plant structures; EXPRESSED DURING: 13 growth stages; BEST Arabidopsis thaliana protein match is: unknown protein (TAIR:AT1G19370.1); Has 51 Blast hits to 49 pr	1953500		853020		1393300	1074000	1.13749	0.79511	0.793871	1.58351	0	0.69146
>ATCG00470.1 | Symbols: ATPE | ATP synthase epsilon chain | chrC:52265-52663 REVERSE LENGTH=132	7332800	6359200	3552400	7465400	1152000	11203000	0.870033	0.798311	0.2971	1.10989	0.962523	0.537688
>AT4G14965.1 | Symbols: AtMAPR4, MAPR4 | membrane-associated progesterone binding protein 4 | chr4:8551356-8553368 FORWARD LENGTH=245		1586800	3816400		3449300	2583700	0.895607	0.816948	0.635571	0	0.52604	1.26517
>AT3G16110.1 | Symbols: ATPDIL1-6, ATPDI4, PDI4, PDIL1-6 | PDI-like 1-6 | chr3:5460955-5463666 REVERSE LENGTH=534	1924600	3998800	2226600	2498000	2082900	4244700	0.92345	0.819795	0.380908	0.65421	1.35927	0.756866
>AT3G47470.1 | Symbols: LHCA4, CAB4 | light-harvesting chlorophyll-protein complex I subunit A4 | chr3:17493622-17494773 REVERSE LENGTH=251	55303000	25061000	21204000	23460000	25561000	43591000	1.0967	0.82342	0.604894	1.79144	0.811806	0.686866
>AT4G24670.1 | Symbols: TAR2 | tryptophan aminotransferase related 2 | chr4:12727940-12730694 REVERSE LENGTH=440	8214400	9610200	3419100		4083400	8668100	1.11065	0.827128	0.509333	1.28838	1.50731	0.536266
>ATCG00490.1 | Symbols: RBCL | ribulose-bisphosphate carboxylases | chrC:54958-56397 FORWARD LENGTH=479	1279400000	1011600000	699390000	1076200000	384370000	1846300000	0.904296	0.827761	0.26335	1.16067	0.917726	0.634488
>AT5G37780.1 | Symbols: CAM1, TCH1, ACAM-1 | calmodulin 1 | chr5:15004769-15006117 REVERSE LENGTH=149;>AT1G66410.1 | Symbols: CAM4, ACAM-4 | calmodulin 4 | chr1:24774431-24775785 REVERSE LENGTH=149	3709800	42032000	28672000	28502000	15365000	23850000	1.09889	0.859992	0.861746	0.164352	1.8621	1.27023
>AT3G16640.1 | Symbols: TCTP | translationally controlled tumor protein | chr3:5669709-5670729 REVERSE LENGTH=168	7775500		2392900	3002200		8732000	0.866561	0.860539	0.678767	1.32527	0	0.407851
>AT4G13930.1 | Symbols: SHM4 | serine hydroxymethyltransferase 4 | chr4:8048013-8050021 REVERSE LENGTH=471	12269000	7124700	28301000	18046000	6729300	19171000	1.0853	0.875986	0.753974	0.837545	0.486369	1.93197
>AT1G19370.1 | Symbols: | unknown protein; LOCATED IN: endoplasmic reticulum; EXPRESSED IN: 22 plant structures; EXPRESSED DURING: 13 growth stages; BEST Arabidopsis thaliana protein match is: unknown protein (TAIR:AT1G75140.1); Has 45 Blast hits to 43 pr	1492900	868040	5100100	249470	5375100	885110	1.14615	0.886402	1.0528	0.688006	0.400038	2.35039
>AT5G58100.1 | Symbols: | unknown protein; INVOLVED IN: pollen exine formation; EXPRESSED IN: 19 plant structures; EXPRESSED DURING: 8 growth stages; BEST Arabidopsis thaliana protein match is: unknown protein (TAIR:AT3G28720.1); Has 35333 Blast hits to 3	1518900	968730	456820	1008700	158730	1625400	1.05429	0.927833	0.570556	1.63157	1.04059	0.490707
>AT5G25980.1 | Symbols: TGG2, BGLU37 | glucoside glucohydrolase 2 | chr5:9072730-9075143 FORWARD LENGTH=467	12702000	10787000	28936000	12370000	21949000	16310000	1.03547	0.929895	0.590863	0.752652	0.639179	1.71459
>AT1G76160.1 | Symbols: sks5 | SKU5 similar 5 | chr1:28578211-28581020 REVERSE LENGTH=541	16934000	14907000	9242400	601100	25003000	13421000	1.05274	0.930714	0.306463	1.30178	1.14595	0.710497
>AT2G45470.1 | Symbols: FLA8, AGP8 | FASCICLIN-like arabinogalactan protein 8 | chr2:18742797-18744059 REVERSE LENGTH=420	12901000	4972600	11930000	3550000	5485800	19711000	1.03676	0.953474	0.451302	1.34634	0.518938	1.24501
>AT1G03870.1 | Symbols: FLA9 | FASCICLIN-like arabinoogalactan 9 | chr1:982625-983368 REVERSE LENGTH=247	4398500	1634800		298980	4089500	4298600	1.04177	0.954877	0.767783	1.51898	0.564563	0
>AT1G04410.1 | Symbols: | Lactate/malate dehydrogenase family protein | chr1:1189418-1191267 REVERSE LENGTH=332	86934000	58135000	28572000	51037000	16654000	110590000	0.973974	0.963992	0.491053	1.46287	0.978259	0.480792

## Sheet: mns1mns2
Fasta headers	iBAQ D1	iBAQ D2	iBAQ D3	iBAQ ND1	iBAQ ND2	iBAQ ND3	Ratio(D/ND)	T-test P value	SD	R1	R2	R3
>AT3G49120.1 | Symbols: ATPERX34, PERX34, PRXCB, ATPCB, PRX34 | peroxidase CB | chr3:18207819-18210041 FORWARD LENGTH=353	743680000	794030000	746670000	546450000	493300000	656740000	1.34653	0.018209	0.0499491	1.31509	1.40413	1.32038
>AT3G32980.1 | Symbols: PRX32, ATPRX32, peroxidase superfamily protein	3196800	9105600	2025400	3087800	8590200	4134600	0.9061	0.866651	0.720009	0.606504	1.72753	0.384263
>AT1G53840.1 | Symbols: ATPME1, PME1 | pectin methylesterase 1 | chr1:20101533-20103458 FORWARD LENGTH=586	51969000	50024000	45445000	33986000	36233000	32754000	1.43181	0.00246815	0.0975823	1.51406	1.45739	1.32399
>AT1G07230.1 | Symbols: NPC1 | non-specific phospholipase C1 | chr1:2220509-2222778 REVERSE LENGTH=533	2868000	2137700	2222600	875690	336560	465000	4.30961	0.00279602	0.714371	5.12983	3.82358	3.97544
>AT1G17100.1 | Symbols: | SOUL heme-binding family protein | chr1:5844766-5845539 FORWARD LENGTH=232	76670000		75405000	36063000	38450000	24625000	2.30096	0.00442389	1.3286	2.3201	0	2.28182
>AT4G12880.1 | Symbols: ENODL19, AtENODL19 | early nodulin-like protein 19 | chr4:7544572-7545226 REVERSE LENGTH=141	55797000	54435000		37021000		34180000	1.54818	0.00645282	0.894047	1.56731	1.52905	0
>AT5G55730.1 | Symbols: FLA1 | FASCICLIN-like arabinogalactan 1 | chr5:22558375-22560392 REVERSE LENGTH=424	66816000	61714000		34719000		35674000	1.82589	0.00787728	1.05667	1.89837	1.75341	0
>AT1G05070.1 | Symbols: | Protein of unknown function (DUF1068) | chr1:1457172-1458531 REVERSE LENGTH=184	17077000	16736000	19602000		9645600	10623000	1.7569	0.00817129	0.154481	1.68507	1.65142	1.93422
>AT4G20110.1 | Symbols: VSR7, VSR3;1, BP80-3;1 | VACUOLAR SORTING RECEPTOR 7 | chr4:10875567-10878545 FORWARD LENGTH=625;>AT1G30900.1 | Symbols: VSR6, VSR3;3, BP80-3;3 | VACUOLAR SORTING RECEPTOR 6 | chr1:10997275-11000543 FORWARD LENGTH=631	4299400	4354500		2164500	1058700	1871700	2.54781	0.00865542	1.47107	2.53159	2.56403	0
>AT2G44450.1 | Symbols: BGLU15 | beta glucosidase 15 | chr2:18340966-18343744 FORWARD LENGTH=506		2084600	1214200		7427200	6707800	0.233378	0.0106855	0.148145	0	0.294956	0.1718
>AT3G15950.1 | Symbols: NAI2 | DNA topoisomerase-related | chr3:5397783-5402610 REVERSE LENGTH=772	4086400		4478300	7215800	8894500	7741900	0.538611	0.0113156	0.311942	0.513965	0	0.563256
>AT2G39730.1 | Symbols: RCA | rubisco activase | chr2:16570951-16573345 REVERSE LENGTH=474	530200000	541940000	465960000	350950000		339910000	1.48424	0.0122117	0.118407	1.5349	1.56889	1.34893
>AT3G14210.1 | Symbols: ESM1 | epithiospecifier modifier 1 | chr3:4729886-4731562 FORWARD LENGTH=392	1012100000	864700000	814420000	653830000	527910000	611080000	1.50111	0.012801	0.171918	1.69359	1.44694	1.3628
>AT3G18080.1 | Symbols: BGLU44 | B-S glucosidase 44 | chr3:6191586-6194124 FORWARD LENGTH=512;>AT3G18070.1 | Symbols: BGLU43 | beta glucosidase 43 | chr3:6187294-6189947 FORWARD LENGTH=501		14036000	16329000		4091500	4937800	3.36294	0.0128709	1.95813	0	3.10899	3.61689
>AT1G21270.1 | Symbols: WAK2 | wall-associated kinase 2 | chr1:7444997-7447345 FORWARD LENGTH=732	674410		766290	1127300		1114200	0.642739	0.0131671	0.373343	0.601749	0	0.68373
>AT4G01080.1 | Symbols: TBL26 | TRICHOME BIREFRINGENCE-LIKE 26 | chr4:466626-468275 REVERSE LENGTH=442	2227400	2162000	1678500		928530	797090	2.34424	0.0148187	0.347489	2.58156	2.50577	1.94539
>AT5G25980.1 | Symbols: TGG2, BGLU37 | glucoside glucohydrolase 2 | chr5:9072730-9075143 FORWARD LENGTH=467	28665000	33975000		10549000		11498000	2.8412	0.0172036	1.65796	2.60035	3.08205	0
>AT5G06870.1 | Symbols: PGIP2, ATPGIP2 | polygalacturonase inhibiting protein 2 | chr5:2133941-2135016 FORWARD LENGTH=330	23773000	31536000		4592600	6555500	12349000	3.5308	0.017692	2.09788	3.03523	4.02637	0
>AT5G67400.1 | Symbols: RHS19 | root hair specific 19 | chr5:26894896-26896300 FORWARD LENGTH=329	18369000	13308000	3987000	38277000		50265000	0.268528	0.0192965	0.164789	0.414922	0.300603	0.090059
>AT5G14030.1 | Symbols: | translocon-associated protein beta (TRAPB) family protein | chr5:4526878-4528253 FORWARD LENGTH=195	34272000	22688000	26867000	63313000		50224000	0.492215	0.0217585	0.103339	0.603715	0.399658	0.473273
>AT4G02980.1 | Symbols: ABP1, ABP | endoplasmic reticulum auxin binding protein 1 | chr4:1319902-1321449 REVERSE LENGTH=198	18265000	26186000		5641300	9670200	7890400	2.87375	0.0221166	1.73639	2.36166	3.38584	0
>AT4G37800.1 | Symbols: XTH7 | xyloglucan endotransglucosylase/hydrolase 7 | chr4:17775703-17777372 REVERSE LENGTH=293;>AT1G11545.1 | Symbols: XTH8 | xyloglucan endotransglucosylase/hydrolase 8 | chr1:3878689-3880286 REVERSE LENGTH=305;>AT5G65730.1 | Symbo	654550		999190		7455900	9811400	0.0957729	0.0224663	0.0587865	0.0758138	0	0.115732
>AT5G19690.1 | Symbols: STT3A | staurosporin and temperature sensitive 3-like A | chr5:6652649-6658214 FORWARD LENGTH=779	862920		754720		1351100	1523900	0.562657	0.0252989	0.327023	0.600292	0	0.525023
>ATCG00480.1 | Symbols: ATPB, PB | ATP synthase subunit beta | chrC:52660-54156 REVERSE LENGTH=498	67234000	73261000	58338000	32653000	6456900		3.3893	0.0253897	0.383909	3.43821	3.74642	2.98329
>AT4G24670.1 | Symbols: TAR2 | tryptophan aminotransferase related 2 | chr4:12727940-12730694 REVERSE LENGTH=440	6360900		7342200		1951900	2995200	2.76993	0.0257292	1.61147	2.57157	0	2.96828
>AT3G13410.1 | Symbols: | unknown protein; FUNCTIONS IN: molecular_function unknown; INVOLVED IN: biological_process unknown; LOCATED IN: endoplasmic reticulum; EXPRESSED IN: 25 plant structures; EXPRESSED DURING: 15 growth stages; BEST Arabidopsis thalia	7936200	9037300	10810000		3295700	4999700	2.23284	0.0266003	0.349572	1.9134	2.17887	2.60626
>AT4G33220.1 | Symbols: PME44, ATPME44 | pectin methylesterase 44 | chr4:16022506-16026130 FORWARD LENGTH=525	7570300	7763400	5457500	1797000	2403100	4768100	2.31832	0.0280259	0.427918	2.53238	2.59698	1.82562
>AT1G01430.1 | Symbols: TBL25 | TRICHOME BIREFRINGENCE-LIKE 25 | chr1:156953-158536 REVERSE LENGTH=456	7940400	8434300	7269400	6171500		6125900	1.28179	0.0285128	0.0950915	1.29139	1.37172	1.18227
>AT1G19370.1 | Symbols: | unknown protein; LOCATED IN: endoplasmic reticulum; EXPRESSED IN: 22 plant structures; EXPRESSED DURING: 13 growth stages; BEST Arabidopsis thaliana protein match is: unknown protein (TAIR:AT1G75140.1); Has 45 Blast hits to 43 pr	266240	268220			3138400	4336100	0.0715044	0.0285155	0.041284	0.0712395	0.0717693	0
>AT4G22130.1 | Symbols: SRF8 | STRUBBELIG-receptor family 8 | chr4:11723733-11727331 FORWARD LENGTH=703	3419400	2702500	3666300		1730500	1904100	1.79537	0.0316452	0.275483	1.88158	1.4871	2.01744
>AT1G03870.1 | Symbols: FLA9 | FASCICLIN-like arabinoogalactan 9 | chr1:982625-983368 REVERSE LENGTH=247	6813600		7305700	2974100	1204500		3.37895	0.0324857	1.95439	3.26119	0	3.49672
>AT3G07770.1 | Symbols: Hsp89.1, AtHsp90.6, AtHsp90-6 | HEAT SHOCK PROTEIN 89.1 | chr3:2479611-2483970 FORWARD LENGTH=799	862890	1454000		341840	337260	285750	3.60194	0.0324927	2.27358	2.68298	4.52091	0
>AT3G52850.1 | Symbols: VSR1, BP-80, ATELP, BP80, BP80B, ATELP1, ATVSR1, GFS1, VSR1;1, BP80-1;1 | vacuolar sorting receptor homolog 1 | chr3:19587999-19591690 FORWARD LENGTH=623	10091000	6609900	9236300	3785600	1580300		3.22247	0.0327039	0.676172	3.76116	2.46367	3.44259
>AT5G23210.1 | Symbols: SCPL34 | serine carboxypeptidase-like 34 | chr5:7810892-7814837 FORWARD LENGTH=499	7762200	11030000	5559500	2008700	2794300	3801400	2.83015	0.034848	0.959675	2.70636	3.84571	1.93837
>AT2G04780.1 | Symbols: FLA7 | FASCICLIN-like arabinoogalactan 7 | chr2:1677488-1678252 FORWARD LENGTH=254	292660000	364330000			131850000	146660000	2.35895	0.0354151	1.38604	2.10161	2.61628	0
>AT1G27950.1 | Symbols: LTPG1 | glycosylphosphatidylinositol-anchored lipid protein transfer 1 | chr1:9740740-9741991 FORWARD LENGTH=193	496620000	435950000	390840000	328960000	226680000	333440000	1.48852	0.0355629	0.179108	1.67573	1.47101	1.3188
>AT1G74380.1 | Symbols: XXT5 | xyloglucan xylosyltransferase 5 | chr1:27959848-27961221 FORWARD LENGTH=457	1204500		1010800	2292800		1948000	0.522378	0.0360731	0.305034	0.568053	0	0.476703
>AT1G52400.1 | Symbols: BGL1, BGLU18, ATBG1 | beta glucosidase 18 | chr1:19515250-19517930 FORWARD LENGTH=528	35964000	52875000		23344000	17185000	19798000	2.20894	0.0361749	1.34286	1.78845	2.62942	0
>AT1G79340.1 | Symbols: AtMC4, MC4 | metacaspase 4 | chr1:29842849-29844368 FORWARD LENGTH=418	11124000	9291900		4249400		2182400	3.17421	0.0368685	1.85464	3.45906	2.88936	0
>AT1G77630.1 | Symbols: | Peptidoglycan-binding LysM domain-containing protein | chr1:29173726-29175387 FORWARD LENGTH=423	11320000	12714000	10338000	9568100	9210800	9206400	1.22822	0.0382985	0.127989	1.21349	1.36293	1.10822
>AT1G28290.1 | Symbols: AGP31 | arabinogalactan protein 31 | chr1:9889331-9890843 REVERSE LENGTH=359	93014000	77984000		20921000	38142000		2.89518	0.0392596	1.69079	3.14965	2.64071	0
>AT5G58100.1 | Symbols: | unknown protein; INVOLVED IN: pollen exine formation; EXPRESSED IN: 19 plant structures; EXPRESSED DURING: 8 growth stages; BEST Arabidopsis thaliana protein match is: unknown protein (TAIR:AT3G28720.1); Has 35333 Blast hits to 3	1315300	1081100	908710	2867200		5011400	0.27967	0.0398136	0.0518053	0.333892	0.27444	0.230678
>AT3G56750.1 | Symbols: | unknown protein; BEST Arabidopsis thaliana protein match is: unknown protein (TAIR:AT2G41150.2); Has 128 Blast hits to 128 proteins in 16 species: Archae - 0; Bacteria - 0; Metazoa - 0; Fungi - 0; Plants - 117; Viruses - 0; Other	5964500	6834000		2065500		3322500	2.37537	0.0400042	1.38088	2.21399	2.53675	0
>AT1G09870.1 | Symbols: | histidine acid phosphatase family protein | chr1:3205817-3208444 FORWARD LENGTH=487	71160000	89419000		57907000	49872000	44070000	1.58624	0.0403475	0.933407	1.40587	1.7666	0
>AT2G33530.1 | Symbols: scpl46 | serine carboxypeptidase-like 46 | chr2:14197866-14200536 REVERSE LENGTH=465	13707000	16377000			8627300	7513600	1.86384	0.040455	1.08873	1.69842	2.02925	0
>AT1G74790.1 | Symbols: | catalytics | chr1:28098912-28101673 FORWARD LENGTH=695	124100000	135260000	108160000	104760000	88494000	89591000	1.29937	0.0405219	0.144462	1.31627	1.43464	1.1472
>AT3G62020.2 | Symbols: GLP10 | germin-like protein 10 | chr3:22971443-22972018 REVERSE LENGTH=191		44877000	27934000	15611000	9513000	3262900	3.84743	0.0409857	2.39495	0	4.74272	2.95214
>AT1G13900.1 | Symbols: | Purple acid phosphatases superfamily protein | chr1:4753494-4755554 REVERSE LENGTH=656	13227000	9986500		3575700	4483800	7302500	2.26665	0.0412565	1.34636	2.58306	1.95023	0
>AT5G63910.1 | Symbols: FCLY | farnesylcysteine lyase | chr5:25572053-25574077 REVERSE LENGTH=500	4708700	6247000			1594400	1933700	3.10527	0.0421558	1.84509	2.66926	3.54128	0
>AT5G26000.2 | Symbols: TGG1, BGLU38 | thioglucoside glucohydrolase 1 | chr5:9080009-9082347 REVERSE LENGTH=456	786900000	809730000	689290000	641120000	672450000	625890000	1.17864	0.0427511	0.0989537	1.21719	1.25251	1.06621
>AT1G67490.1 | Symbols: GCS1, KNF | glucosidase 1 | chr1:25280633-25286581 REVERSE LENGTH=852	718910		839110	389090	225180		2.53638	0.0433895	1.47739	2.3407	0	2.73206
>AT2G35610.1 | Symbols: XEG113 | xyloglucanase 113 | chr2:14947617-14951106 REVERSE LENGTH=644		947270	1025400	3036500		4166100	0.273883	0.0438161	0.158498	0	0.263036	0.284731
>AT1G59970.1 | Symbols: | Matrixin family protein | chr1:22073601-22074683 FORWARD LENGTH=360		5318800	5331700	8739000	11746000	8668100	0.547995	0.0439218	0.316386	0	0.547331	0.548659
>AT2G12400.1 | Symbols: | unknown protein; FUNCTIONS IN: molecular_function unknown; INVOLVED IN: biological_process unknown; LOCATED IN: endomembrane system; EXPRESSED IN: 25 plant structures; EXPRESSED DURING: 13 growth stages; BEST Arabidopsis thaliana	84809000	93301000	65630000	49168000	62321000	54359000	1.46966	0.0452815	0.256415	1.5341	1.68771	1.18717
>AT4G39640.1 | Symbols: GGT1 | gamma-glutamyl transpeptidase 1 | chr4:18400608-18402861 FORWARD LENGTH=572	18151000	14564000		10375000	6520200	10896000	1.76576	0.0499065	1.03768	1.95936	1.57215	0
>AT2G45470.1 | Symbols: FLA8, AGP8 | FASCICLIN-like arabinogalactan protein 8 | chr2:18742797-18744059 REVERSE LENGTH=420	56225000	48630000	36395000	25934000	34222000	29664000	1.57259	0.0518386	0.334171	1.87792	1.62425	1.2156
>AT1G36050.1 | Symbols: | Endoplasmic reticulum vesicle transporter protein | chr1:13450467-13453683 FORWARD LENGTH=489	2914900	2259600		4251100		3828400	0.640448	0.0650998	0.378554	0.721555	0.559342	0
>AT3G10740.1 | Symbols: ASD1, ARAF1, ARAF, ATASD1 | alpha-L-arabinofuranosidase 1 | chr3:3361031-3364573 REVERSE LENGTH=678	7834300	14993000		1647400	5630100	3895900	3.06451	0.0864094	2.01345	2.10347	4.02554	0
>AT2G38960.2 | Symbols: AERO2, ERO2 | endoplasmic reticulum oxidoreductins 2 | chr2:16265455-16267792 FORWARD LENGTH=478;>AT1G72280.1 | Symbols: AERO1, ERO1 | endoplasmic reticulum oxidoreductins 1 | chr1:27212039-27214506 REVERSE LENGTH=469	2012800	1938600		1617000		1284300	1.36194	0.0911886	0.786733	1.38752	1.33637	0
>AT1G28440.1 | Symbols: HSL1 | HAESA-like 1 | chr1:9996914-10000171 FORWARD LENGTH=996	655120	607740	536750	503010	547020	414200	1.22905	0.0982121	0.122063	1.34225	1.24517	1.09972
>AT5G20630.1 | Symbols: GLP3, GLP3A, GLP3B, ATGER3, GER3 | germin 3 | chr5:6975315-6975950 REVERSE LENGTH=211	731760000	930340000	701610000	537960000	676760000	625250000	1.28465	0.101475	0.20262	1.19311	1.51688	1.14395
>AT4G37160.1 | Symbols: sks15 | SKU5 similar 15 | chr4:17494820-17497124 REVERSE LENGTH=541;>AT2G23630.1 | Symbols: sks16 | SKU5 similar 16 | chr2:10052581-10055311 REVERSE LENGTH=541	5515800		1397700	10695000	6190800	10450000	0.379365	0.102668	0.3147	0.605338	0	0.153392
>AT3G17350.1 | Symbols: | unknown protein; FUNCTIONS IN: molecular_function unknown; INVOLVED IN: biological_process unknown; LOCATED IN: endomembrane system; EXPRESSED IN: 19 plant structures; EXPRESSED DURING: 13 growth stages; BEST Arabidopsis thaliana	4491800	7116200	3731900	2511600		1437400	2.58967	0.107926	0.89931	2.27491	3.60405	1.89005
>AT4G37930.1 | Symbols: SHM1, STM, SHMT1 | serine transhydroxymethyltransferase 1 | chr4:17831891-17834742 REVERSE LENGTH=517	71467000	100200000	44509000	42055000	17308000	51288000	1.95367	0.137964	0.755083	1.93763	2.71665	1.20674
>AT5G37780.1 | Symbols: CAM1, TCH1, ACAM-1 | calmodulin 1 | chr5:15004769-15006117 REVERSE LENGTH=149;>AT1G66410.1 | Symbols: CAM4, ACAM-4 | calmodulin 4 | chr1:24774431-24775785 REVERSE LENGTH=149	14573000	75355000	28900000	6409300	2717100	8419900	6.77225	0.140782	5.43271	2.49164	12.8839	4.94121
>AT5G52060.1 | Symbols: ATBAG1, BAG1 | BCL-2-associated athanogene 1 | chr5:21152449-21153741 REVERSE LENGTH=342	4493900		4417200	3113500		1162800	2.08383	0.140872	1.20324	2.10177	0	2.0659
>AT1G06680.1 | Symbols: PSBP-1, OEE2, PSII-P, OE23 | photosystem II subunit P-1 | chr1:2047940-2049186 FORWARD LENGTH=263	59558000	62547000	39197000	33336000	7131000	46106000	1.86319	0.141339	0.440315	2.06385	2.16743	1.35829
>AT2G39780.1 | Symbols: RNS2 | ribonuclease 2 | chr2:16591256-16593515 FORWARD LENGTH=259	37757000	44385000	27010000	32684000	20839000	20927000	1.46611	0.145518	0.353331	1.52144	1.78852	1.08838
>AT4G02770.1 | Symbols: PSAD-1 | photosystem I subunit D-1 | chr4:1229247-1229873 REVERSE LENGTH=208;>AT1G03130.1 | Symbols: PSAD-2 | photosystem I subunit D-2 | chr1:753528-754142 REVERSE LENGTH=204	25621000	12479000	6001900	4677500	377630	7275100	3.57673	0.158166	2.43218	6.2337	3.0362	1.46029
>AT2G17120.1 | Symbols: LYM2 | lysm domain GPI-anchored protein 2 precursor | chr2:7459156-7460648 FORWARD LENGTH=350	180300000	153060000	173890000	173290000	82201000	110370000	1.38646	0.169433	0.116781	1.47843	1.25507	1.42587
>AT1G29930.1 | Symbols: CAB1, AB140, CAB140, LHCB1.3 | chlorophyll A/B binding protein 1 | chr1:10478071-10478874 FORWARD LENGTH=267;>AT1G29910.1 | Symbols: CAB3, AB180, LHCB1.2 | chlorophyll A/B binding protein 3 | chr1:10472443-10473246 REVERSE LENGTH=26	58608000	92417000	45757000	45179000	6102900	48216000	1.97775	0.170437	0.7267	1.76711	2.7865	1.37964
>AT3G20570.1 | Symbols: ENODL9, AtENODL9 | early nodulin-like protein 9 | chr3:7186754-7187453 REVERSE LENGTH=203	14263000	13588000	12859000	18278000	13499000	23541000	0.735927	0.171664	0.0380802	0.77351	0.736903	0.697368
>AT2G34930.1 | Symbols: | disease resistance family protein / LRR family protein | chr2:14737169-14739886 REVERSE LENGTH=905	557530	1571300		1428700	2424500	2232300	0.52473	0.17544	0.39271	0.274848	0.774612	0
>AT5G06860.1 | Symbols: PGIP1, ATPGIP1 | polygalacturonase inhibiting protein 1 | chr5:2132373-2133434 FORWARD LENGTH=330	765090	12813000	16351000	27021000	12444000	20876000	0.495999	0.184698	0.406241	0.0380383	0.63703	0.81293
>AT3G45600.1 | Symbols: TET3 | tetraspanin3 | chr3:16733973-16735854 REVERSE LENGTH=285	15374000	8308700			5100200	4731300	2.40886	0.189371	1.56545	3.1275	1.69022	0
>AT5G55480.1 | Symbols: SVL1 | SHV3-like 1 | chr5:22474277-22477819 FORWARD LENGTH=766	56894000	57078000	60241000	60580000	44005000	41618000	1.19158	0.198293	0.0386078	1.16743	1.17121	1.23611
>AT1G78680.1 | Symbols: ATGGH2, GGH2 | gamma-glutamyl hydrolase 2 | chr1:29593933-29596037 FORWARD LENGTH=347	16657000	16127000	11590000	10070000	5069300	14563000	1.49396	0.198734	0.281299	1.68239	1.62886	1.17062
>AT1G78820.1 | Symbols: | D-mannose binding lectin protein with Apple-like carbohydrate-binding domain | chr1:29634401-29635768 REVERSE LENGTH=455	78002000	59462000	62234000	57279000	21284000	59033000	1.45134	0.202336	0.218038	1.70067	1.29645	1.35689
>AT2G14740.1 | Symbols: ATVSR3, VSR3, VSR2;2, BP80-2;2 | vaculolar sorting receptor 3 | chr2:6308895-6312303 FORWARD LENGTH=628;>AT2G14720.1 | Symbols: VSR4, VSR2;1, BP80-2;1, MTV4 | vacuolar sorting receptor 4 | chr2:6300878-6304156 REVERSE LENGTH=628	40262000	50772000	31096000	31869000	29048000	35245000	1.27004	0.220048	0.307158	1.25607	1.58395	0.970113
>AT1G66150.1 | Symbols: TMK1 | transmembrane kinase 1 | chr1:24631503-24634415 FORWARD LENGTH=942	6479500	8696800	5984000	6276300	1871500	5911000	1.50513	0.222243	0.308263	1.38266	1.85581	1.27692
>AT1G65590.1 | Symbols: HEXO3, ATHEX1 | beta-hexosaminidase 3 | chr1:24385996-24390989 FORWARD LENGTH=535	4503700	6635000	1087900	1293500		461100	4.64554	0.226603	3.18959	5.13359	7.56298	1.24005
>AT3G56310.2 | Symbols: | Melibiase family protein | chr3:20882886-20885745 FORWARD LENGTH=413	38292000	19845000	18469000	23757000	1862300	12507000	2.00927	0.226761	0.870974	3.01304	1.56152	1.45325
>AT2G22990.2 | Symbols: SNG1, SCPL8 | sinapoylglucose 1 | chr2:9787071-9789925 FORWARD LENGTH=319	87307000	62421000	38619000	33174000	55002000	33125000	1.55272	0.230895	0.602122	2.15926	1.54379	0.95512
>AT5G44130.1 | Symbols: FLA13 | FASCICLIN-like arabinogalactan protein 13 precursor | chr5:17761128-17761871 FORWARD LENGTH=247	5718900	8294200	14116000		362270	6580900	2.70089	0.23239	1.23917	1.64735	2.38917	4.06615
>AT1G74000.1 | Symbols: SS3 | strictosidine synthase 3 | chr1:27829266-27831401 REVERSE LENGTH=329	4785400	3517800		5214400	5272400	4508600	0.830575	0.233323	0.496014	0.957374	0.703776	0
>AT5G11700.2 | Symbols: | BEST Arabidopsis thaliana protein match is: glycine-rich protein (TAIR:AT4G32920.3); Has 8203 Blast hits to 3102 proteins in 389 species: Archae - 3; Bacteria - 5624; Metazoa - 852; Fungi - 139; Plants - 704; Viruses - 77; Other	2603200	1999700			444490	1764300	2.0839	0.240787	1.23377	2.35713	1.81067	0
>AT4G21410.1 | Symbols: CRK29 | cysteine-rich RLK (RECEPTOR-like protein kinase) 29 | chr4:11402463-11405025 REVERSE LENGTH=679		1438600	858600	779210	960650	596500	1.47486	0.243196	0.929372	0	1.84723	1.10248
>ATCG00470.1 | Symbols: ATPE | ATP synthase epsilon chain | chrC:52265-52663 REVERSE LENGTH=132	8851200	22299000			1278700	6565200	3.97126	0.248092	2.86291	2.25684	5.68569	0
>AT2G22970.1 | Symbols: SCPL11 | serine carboxypeptidase-like 11 | chr2:9774875-9778224 FORWARD LENGTH=433	2382600	3111000		1581500		2284700	1.42093	0.24922	0.84173	1.23253	1.60933	0
>AT1G67830.1 | Symbols: ATFXG1, FXG1 | alpha-fucosidase 1 | chr1:25431705-25432972 REVERSE LENGTH=372	24833000	13738000	12724000	14660000	7200500	11722000	1.52743	0.254711	0.600096	2.21839	1.22725	1.13666
>AT3G11800.1 | Symbols: | unknown protein; FUNCTIONS IN: molecular_function unknown; INVOLVED IN: biological_process unknown; LOCATED IN: endomembrane system; EXPRESSED IN: 24 plant structures; EXPRESSED DURING: 15 growth stages; BEST Arabidopsis thaliana	10883000	17281000		829080	7909600	12538000	1.98555	0.256597	1.23191	1.5345	2.43661	0
>AT1G19570.1 | Symbols: DHAR1, ATDHAR1, DHAR5 | dehydroascorbate reductase | chr1:6773462-6774413 REVERSE LENGTH=213	16712000	63023000	18606000	13913000	10351000	14619000	2.52915	0.261943	2.02207	1.28941	4.86251	1.43554
>AT3G14310.1 | Symbols: ATPME3, PME3 | pectin methylesterase 3 | chr3:4772214-4775095 REVERSE LENGTH=592	15448000	22667000	17842000	32584000	20609000	106020000	0.35146	0.268131	0.0692862	0.291082	0.427107	0.336191
>AT4G10340.1 | Symbols: LHCB5 | light harvesting complex of photosystem II 5 | chr4:6408200-6409496 FORWARD LENGTH=280	346140000	446810000	215570000	229850000	73792000	325670000	1.60258	0.272158	0.552707	1.65009	2.12999	1.02765
>AT2G27190.1 | Symbols: PAP1, ATPAP1, PAP12, ATPAP12 | purple acid phosphatase 12 | chr2:11621400-11623438 REVERSE LENGTH=469	6362400	5555500	3648700		490090	4781800	1.9685	0.273088	0.528655	2.41371	2.10759	1.38421
>AT1G10850.1 | Symbols: | Leucine-rich repeat protein kinase family protein | chr1:3612228-3614343 FORWARD LENGTH=663	4334600	4738700			4217100	2750000	1.30231	0.300549	0.754121	1.24431	1.36031	0
>ATCG00490.1 | Symbols: RBCL | ribulose-bisphosphate carboxylases | chrC:54958-56397 FORWARD LENGTH=479	1442900000	1417600000	1091300000	1133500000	178370000	1319700000	1.50169	0.301424	0.223556	1.64491	1.61607	1.24409
>AT5G43600.1 | Symbols: ATAAH-2, UAH | ureidoglycolate amidohydrolase | chr5:17512651-17515280 FORWARD LENGTH=476	13168000	5705800	1255100	1744300	2057300	4013000	2.57581	0.311587	2.31089	5.05515	2.19044	0.481829
>AT1G66970.1 | Symbols: SVL2 | SHV3-like 2 | chr1:24992746-24996005 REVERSE LENGTH=763	30307000	23685000	19877000	21133000	33126000	48383000	0.719676	0.319939	0.154261	0.885807	0.69226	0.580961
>AT3G07570.1 | Symbols: | Cytochrome b561/ferric reductase transmembrane with DOMON related domain | chr3:2418205-2420206 REVERSE LENGTH=369	6840500	10142000	2947200	11411000	5384900	14957000	0.62765	0.321051	0.340264	0.646287	0.958212	0.27845
>AT3G09220.1 | Symbols: LAC7 | laccase 7 | chr3:2827434-2830477 REVERSE LENGTH=567	20718000	12831000	7874300	9179500	10355000	9134300	1.44489	0.321486	0.677809	2.168	1.34268	0.823993
>AT3G16110.1 | Symbols: ATPDIL1-6, ATPDI4, PDI4, PDIL1-6 | PDI-like 1-6 | chr3:5460955-5463666 REVERSE LENGTH=534		2332300	3070200	5046200		3078600	0.664939	0.324531	0.3945	0	0.574119	0.75576
>AT1G30570.1 | Symbols: HERK2 | hercules receptor kinase 2 | chr1:10828933-10831482 FORWARD LENGTH=849	1765700	954400	1079800	888230	182690	1351100	1.5689	0.338684	0.540948	2.18706	1.18215	1.33748
>AT1G55120.1 | Symbols: ATFRUCT5, AtcwINV3, FRUCT5 | beta-fructofuranosidase 5 | chr1:20566617-20569165 FORWARD LENGTH=594		874850	758510	845360	294380	604830	1.40438	0.345158	0.816966	0	1.50441	1.30435
>AT3G07390.1 | Symbols: AIR12 | auxin-responsive family protein | chr3:2365452-2366273 FORWARD LENGTH=273	95384000	105270000	46509000	67262000	19435000	78703000	1.49433	0.348381	0.570663	1.73006	1.90937	0.843573
>AT1G04410.1 | Symbols: | Lactate/malate dehydrogenase family protein | chr1:1189418-1191267 REVERSE LENGTH=332	103850000	57986000	75002000	82648000	7421200	64207000	1.53516	0.354411	0.450847	2.01943	1.12758	1.45846
>AT5G60640.1 | Symbols: ATPDIL1-4, PDI2, ATPDI2, PDIL1-4 | PDI-like 1-4 | chr5:24371141-24373993 REVERSE LENGTH=597	36147000	33338000	20416000	33553000	29534000	60514000	0.727348	0.35962	0.203634	0.877347	0.809168	0.49553
>AT4G33740.2 | Symbols: | unknown protein; BEST Arabidopsis thaliana protein match is: unknown protein (TAIR:AT4G37820.1); Has 138092 Blast hits to 73110 proteins in 2951 species: Archae - 732; Bacteria - 17903; Metazoa - 48520; Fungi - 16808; Plants - 70	1945000	17042000	4471100	1046900	5109100	2380200	2.74807	0.360339	2.84188	0.683559	5.98932	1.57134
>AT5G59090.1 | Symbols: ATSBT4.12, SBT4.12 | subtilase 4.12 | chr5:23852125-23855235 REVERSE LENGTH=736	105750000	76160000	25660000	55228000	55638000	12507000	1.68246	0.363789	0.984755	2.57147	1.85194	0.623961
>AT1G78830.1 | Symbols: | Curculin-like (mannose-binding) lectin family protein | chr1:29637141-29638508 REVERSE LENGTH=455	594380000	611710000	376590000	558090000	353730000	363960000	1.24056	0.36718	0.308119	1.39769	1.43844	0.885552
>AT5G60360.1 | Symbols: SAG2, AALP, ALP | aleurain-like protease | chr5:24280044-24282152 FORWARD LENGTH=358	4540000	6106600	1426200		1448600	2710800	1.93502	0.367494	1.14557	2.18301	2.93629	0.685772
>AT1G09210.1 | Symbols: CRT1b, AtCRT1b | calreticulin 1b | chr1:2973217-2976655 REVERSE LENGTH=424	2369800	10482000	3574900	1745100	2839800	3927300	1.92978	0.368404	1.54274	0.835201	3.69423	1.25992
>AT5G06320.1 | Symbols: NHL3 | NDR1/HIN1-like 3 | chr5:1931016-1931711 REVERSE LENGTH=231	67630000	116630000	37528000	37412000	62376000	49858000	1.48208	0.375752	0.800398	1.3558	2.33812	0.752336
>AT2G01270.1 | Symbols: AtQSOX2, QSOX2 | quiescin-sulfhydryl oxidase 2 | chr2:139457-142141 FORWARD LENGTH=495	10092000	10205000	8303600	4881900	6841300	11099000	1.25319	0.376032	0.140212	1.3266	1.34146	1.09152
>AT3G19280.1 | Symbols: FUT11, ATFUT11, FUCT1, FUCTA | fucosyltransferase 11 | chr3:6681409-6683801 REVERSE LENGTH=501	1360500		530440	797920	466390	541820	1.57044	0.381184	1.139	2.2598	0	0.881066
>AT1G61900.1 | Symbols: | unknown protein; FUNCTIONS IN: molecular_function unknown; INVOLVED IN: biological_process unknown; LOCATED IN: anchored to plasma membrane, plasma membrane, anchored to membrane; EXPRESSED IN: 23 plant structures; EXPRESSED DURI	54601000	107030000	25945000	26722000	46368000	43537000	1.60834	0.389398	1.05771	1.4045	2.75314	0.667384
>AT1G02065.2 | Symbols: SPL8 | squamosa promoter binding protein-like 8 | chr1:365625-366365 FORWARD LENGTH=246	13381000	17653000	11799000	17700000	3622000	8695700	1.42692	0.393589	0.302647	1.33731	1.76426	1.1792
>AT2G25060.1 | Symbols: ENODL14, AtENODL14 | early nodulin-like protein 14 | chr2:10662308-10662930 FORWARD LENGTH=182	106710000	101810000	144170000	120700000	86352000	99177000	1.15172	0.406615	0.227006	1.04539	0.997391	1.41237
>AT3G11650.1 | Symbols: NHL2 | NDR1/HIN1-like 2 | chr3:3676264-3676986 REVERSE LENGTH=240	16847000	20021000	22770000	26242000	10396000	4181100	1.46103	0.407654	0.217842	1.23817	1.47144	1.67348
>AT4G18760.1 | Symbols: AtRLP51, RLP51 | receptor like protein 51 | chr4:10308163-10309458 REVERSE LENGTH=431	64028000	88700000	84897000	83661000	27579000	74135000	1.28186	0.410001	0.21497	1.03619	1.43547	1.37392
>AT3G01070.1 | Symbols: ENODL16, AtENODL16 | early nodulin-like protein 16 | chr3:19659-20444 FORWARD LENGTH=167	6359200	6884400	2570800	2251600	14614000	9508100	0.599628	0.410705	0.267715	0.723357	0.783098	0.292428
>AT4G13930.1 | Symbols: SHM4 | serine hydroxymethyltransferase 4 | chr4:8048013-8050021 REVERSE LENGTH=471	81056000	93555000	14051000	43399000	35800000	41445000	1.56379	0.412122	1.06311	2.01558	2.32639	0.3494
>AT1G61520.1 | Symbols: LHCA3 | photosystem I light harvesting complex gene 3 | chr1:22700152-22701149 FORWARD LENGTH=273	94001000	60201000	30812000	43278000	1484000	67803000	1.64362	0.415447	0.842717	2.50525	1.60443	0.821179
>AT1G70520.1 | Symbols: CRK2 | cysteine-rich RLK (RECEPTOR-like protein kinase) 2 | chr1:26584888-26587334 REVERSE LENGTH=649	5211200	3937100	3813100	4707800	3542500	2758800	1.17734	0.417941	0.210885	1.42006	1.07287	1.03908
>AT4G27080.1 | Symbols: ATPDIL5-4, ATPDI7, PDI7, PDIL5-4 | PDI-like 5-4 | chr4:13589156-13593335 FORWARD LENGTH=480	23652000	23192000	18807000	49304000	17451000	25096000	0.714755	0.419894	0.0873495	0.772512	0.757488	0.614267
>AT1G21670.1 | Symbols: | LOCATED IN: cell wall, plant-type cell wall; EXPRESSED IN: 23 plant structures; EXPRESSED DURING: 14 growth stages; CONTAINS InterPro DOMAIN/s: WD40-like Beta Propeller (InterPro:IPR011659), Six-bladed beta-propeller, TolB-like (	775350	374520			173030	476520	1.77026	0.424525	1.1939	2.38735	1.15317	0
>AT3G14920.1 | Symbols: | Peptide-N4-(N-acetyl-beta-glucosaminyl)asparagine amidase A protein | chr3:5018275-5020104 FORWARD LENGTH=609	3821500	6110600	3366500	4363300	4132900	1441600	1.33818	0.42591	0.44396	1.15363	1.84465	1.01627
>AT5G37660.1 | Symbols: PDLP7 | plasmodesmata-located protein 7 | chr5:14959842-14961379 FORWARD LENGTH=288	9670800	14534000	5314500	4873900	9244200	7607200	1.35875	0.428542	0.636871	1.33542	2.00697	0.733868
>AT1G52030.2 | Symbols: MBP2, MBP1.2, F-ATMBP | myrosinase-binding protein 2 | chr1:19346090-19348282 REVERSE LENGTH=642	3941200	1579200	1392900	1944800	1685200	1058500	1.47452	0.43778	0.908951	2.52183	1.01047	0.891266
>AT1G25570.1 | Symbols: | Di-glucose binding protein with Leucine-rich repeat domain | chr1:8992183-8995430 REVERSE LENGTH=628	43118000	32627000	21042000	23534000	23209000	32118000	1.22731	0.442084	0.420075	1.64028	1.24118	0.800472
>AT5G22880.1 | Symbols: H2B, HTB2 | histone B2 | chr5:7652130-7652567 REVERSE LENGTH=145	15219000	24804000		19372000	1402000	17736000	1.55893	0.447114	0.974411	1.18559	1.93228	0
>AT3G48200.1 | Symbols: | unknown protein; FUNCTIONS IN: molecular_function unknown; INVOLVED IN: biological_process unknown; LOCATED IN: endomembrane system; EXPRESSED IN: 21 plant structures; EXPRESSED DURING: 13 growth stages; Has 210 Blast hits to 148	1109400	1147100	929550	850150	368720	1283600	1.27316	0.450273	0.139372	1.32997	1.37516	1.11436
>AT1G02335.1 | Symbols: GL22 | germin-like protein subfamily 2 member 2 precursor | chr1:463979-464876 REVERSE LENGTH=219;>AT1G09560.1 | Symbols: GLP5 | germin-like protein 5 | chr1:3093896-3094639 FORWARD LENGTH=219	1399700	17576000			2310600	1754000	4.66853	0.454178	4.80665	0.688727	8.64833	0
>AT1G41830.1 | Symbols: SKS6 | SKU5-similar 6 | chr1:15603892-15607802 REVERSE LENGTH=542	77106000	47581000	39489000	120550000	41102000	67139000	0.717581	0.454473	0.259626	1.01105	0.623901	0.517796
>AT3G20560.1 | Symbols: ATPDIL5-3, PDI12, ATPDI12, PDIL5-3 | PDI-like 5-3 | chr3:7182182-7186390 FORWARD LENGTH=483		13792000	3226100	1844900	5025500		2.47702	0.454838	2.10007	0	4.0149	0.93913
>AT3G62730.1 | Symbols: | unknown protein; FUNCTIONS IN: molecular_function unknown; INVOLVED IN: biological_process unknown; LOCATED IN: endomembrane system; EXPRESSED IN: 13 plant structures; EXPRESSED DURING: LP.04 four leaves visible, 4 anthesis, LP.0	4801800	4363300	2130500	1901000	3387900	3588300	1.27243	0.458448	0.484129	1.62274	1.47455	0.719991
>AT5G48380.1 | Symbols: BIR1 | BAK1-interacting receptor-like kinase 1 | chr5:19604584-19606532 REVERSE LENGTH=620	3233600	3572500	2218000	2876500	2259900	2781700	1.13968	0.458496	0.267057	1.22514	1.35354	0.840353
>AT3G02350.1 | Symbols: GAUT9 | galacturonosyltransferase 9 | chr3:479248-481178 FORWARD LENGTH=561	1621300		2167100	8770900	602940	4087300	0.422148	0.459279	0.251201	0.361329	0	0.482968
>AT1G79550.1 | Symbols: PGK | phosphoglycerate kinase | chr1:29924347-29926295 REVERSE LENGTH=401	13131000	18581000	7217400	4642700	8742300	14768000	1.38278	0.460677	0.605624	1.39925	1.98	0.76909
>AT5G40170.1 | Symbols: AtRLP54, RLP54 | receptor like protein 54 | chr5:16065179-16067557 REVERSE LENGTH=792	1460500	2769100	1200300	2521500	4918600	991860	0.643967	0.465434	0.299134	0.51963	0.985216	0.427054
>AT5G07830.1 | Symbols: AtGUS2, GUS2 | glucuronidase 2 | chr5:2504168-2506567 FORWARD LENGTH=543	1150100	2324600			1275500	1151900	1.43145	0.468745	0.957668	0.947598	1.9153	0
>AT1G10950.1 | Symbols: TMN1, AtTMN1 | transmembrane nine 1 | chr1:3659322-3663622 FORWARD LENGTH=589	1508000	1255100		760070		11718000	0.221436	0.468946	0.129443	0.241704	0.201169	0
>AT1G42970.1 | Symbols: GAPB | glyceraldehyde-3-phosphate dehydrogenase B subunit | chr1:16127552-16129584 FORWARD LENGTH=447	11397000	10548000	4737800	8820000	1048100	8830400	1.427	0.469124	0.581525	1.82854	1.69233	0.760136
>AT1G08470.1 | Symbols: SSL3 | strictosidine synthase-like 3 | chr1:2682262-2683977 REVERSE LENGTH=390	5912700	1885900	6241500	6164800	5228200	6076600	0.803688	0.46934	0.416501	1.01537	0.32386	1.07183
>AT4G33380.1 | Symbols: | unknown protein; Has 194 Blast hits to 189 proteins in 23 species: Archae - 0; Bacteria - 0; Metazoa - 0; Fungi - 0; Plants - 184; Viruses - 0; Other Eukaryotes - 10 (source: NCBI BLink). | chr4:16072064-16074605 FORWARD LENGTH=3	1894500	2437300	71114000		1048900	1148900	22.8852	0.476961	36.2254	1.724	2.21795	64.7138
>AT3G47470.1 | Symbols: LHCA4, CAB4 | light-harvesting chlorophyll-protein complex I subunit A4 | chr3:17493622-17494773 REVERSE LENGTH=251	24402000	101510000	17265000	16067000		23045000	2.44046	0.478826	2.38879	1.2478	5.19073	0.882849
>AT1G68560.1 | Symbols: ATXYL1, XYL1, TRG1 | alpha-xylosidase 1 | chr1:25734435-25737897 REVERSE LENGTH=915	103510000	144480000	74470000	111410000	56024000	94525000	1.23096	0.482773	0.402819	1.18541	1.65461	0.852843
>AT4G25240.1 | Symbols: SKS1 | SKU5 similar 1 | chr4:12930539-12933563 FORWARD LENGTH=589	12106000	13068000		13990000	6259400	10552000	1.22595	0.483468	0.709352	1.1791	1.2728	0
>AT1G47600.1 | Symbols: BGLU34, TGG4 | beta glucosidase 34 | chr1:17491771-17494589 FORWARD LENGTH=511	1785100	3328000		1327800		2262800	1.42402	0.487566	0.927682	0.994318	1.85373	0
>AT3G52720.1 | Symbols: CAH1, ATACA1, ACA1 | alpha carbonic anhydrase 1 | chr3:19538804-19541116 REVERSE LENGTH=284	47593000	43078000	44305000	59565000	45907000	41874000	0.916048	0.496596	0.0475327	0.969005	0.877078	0.90206
>AT5G34940.1 | Symbols: AtGUS3, GUS3 | glucuronidase 3 | chr5:13235912-13237799 REVERSE LENGTH=401	18606000	6726800	9973900	15447000	2087300	6024600	1.49866	0.502318	0.781826	2.3693	0.856593	1.27008
>AT3G51730.1 | Symbols: | saposin B domain-containing protein | chr3:19186970-19188436 FORWARD LENGTH=213	81033000	85080000	53385000	64014000	50572000	77804000	1.1409	0.5157	0.268984	1.26357	1.32668	0.83245
>AT5G19550.1 | Symbols: ASP2, AAT2 | aspartate aminotransferase 2 | chr5:6598201-6601597 FORWARD LENGTH=405	1607200		641310	9464800	124690		0.234476	0.516193	0.168736	0.3352	0	0.133753
>AT3G17840.1 | Symbols: RLK902 | receptor-like kinase 902 | chr3:6106092-6108430 FORWARD LENGTH=647	25705000	32265000	13220000	13799000	13999000	28092000	1.27375	0.524361	0.519318	1.37976	1.73188	0.709608
>AT2G35780.1 | Symbols: scpl26 | serine carboxypeptidase-like 26 | chr2:15037733-15040104 REVERSE LENGTH=452	19346000	27696000	17132000	25963000	9798200	16782000	1.22136	0.53232	0.318086	1.10458	1.58133	0.978167
>AT1G08660.1 | Symbols: MGP2 | MALE GAMETOPHYTE DEFECTIVE 2 | chr1:2757116-2759677 REVERSE LENGTH=474	1044200	2653000	578740	1119800	1008600	875910	1.42327	0.539349	1.08682	1.0427	2.64919	0.57791
>AT3G44330.1 | Symbols: | INVOLVED IN: protein processing; LOCATED IN: mitochondrion, endoplasmic reticulum, plasma membrane, vacuole; EXPRESSED IN: 25 plant structures; EXPRESSED DURING: 13 growth stages; CONTAINS InterPro DOMAIN/s: Nicalin (InterPro:IPR	5409400	4281300	5738100	13027000	1491300	7575400	0.698335	0.544719	0.103751	0.734517	0.581338	0.77915
>ATCG00680.1 | Symbols: PSBB | photosystem II reaction center protein B | chrC:72371-73897 FORWARD LENGTH=508	27320000	32425000	22571000	32942000	5012600	100840000	0.593078	0.546273	0.106519	0.590513	0.700856	0.487865
>AT4G34260.1 | Symbols: FUC95A | 1,2-alpha-L-fucosidases | chr4:16398130-16401591 FORWARD LENGTH=843	403170	862200	1390800	2814700	729040	606870	0.639947	0.5535	0.357217	0.291405	0.623186	1.00525
>AT1G01900.1 | Symbols: ATSBT1.1, SBTI1.1 | subtilase family protein | chr1:310332-313011 FORWARD LENGTH=774	2427100	2396700	1317500		1841900	3120800	0.824994	0.563161	0.254714	0.978137	0.965886	0.530961
>AT5G15350.1 | Symbols: ENODL17, AtENODL17 | early nodulin-like protein 17 | chr5:4985184-4986154 REVERSE LENGTH=172	1358400000	1648300000	578070000	840230000	955040000	1174500000	1.20709	0.572866	0.559161	1.37223	1.66508	0.583954
>AT5G64570.1 | Symbols: XYL4, ATBXL4 | beta-D-xylosidase 4 | chr5:25810227-25813309 REVERSE LENGTH=784	89370000	26806000	30025000	41528000	26327000	39945000	1.35622	0.57341	0.980396	2.48711	0.745993	0.835575
>AT5G03260.1 | Symbols: LAC11 | laccase 11 | chr5:777198-779338 REVERSE LENGTH=557	7393400	2184700	2300200	2813600		2446000	1.5056	0.591626	1.13106	2.81139	0.830748	0.874667
>AT3G54960.1 | Symbols: ATPDIL1-3, PDI1, ATPDI1, PDIL1-3 | PDI-like 1-3 | chr3:20363514-20366822 REVERSE LENGTH=579	27116000	43122000	16425000	35548000	8249300	23894000	1.28027	0.598642	0.595485	1.20175	1.91112	0.727937
>AT3G11130.1 | Symbols: | Clathrin, heavy chain | chr3:3482575-3491667 REVERSE LENGTH=1705		477890	105070	61465		1355900	0.411298	0.598795	0.354369	0	0.674336	0.148261
>AT4G26690.1 | Symbols: SHV3, MRH5, GPDL2 | PLC-like phosphodiesterase family protein | chr4:13456793-13459890 REVERSE LENGTH=759	203680000	219760000	159880000	196910000	207190000	210020000	0.949847	0.605304	0.151392	0.994985	1.07354	0.78102
>AT2G23810.1 | Symbols: TET8 | tetraspanin8 | chr2:10135859-10137352 REVERSE LENGTH=273	39137000	95483000	19863000	8557300	33463000	66029000	1.42975	0.611508	1.09104	1.08664	2.6511	0.551498
>AT4G28850.1 | Symbols: XTH26, ATXTH26 | xyloglucan endotransglucosylase/hydrolase 26 | chr4:14244336-14245781 FORWARD LENGTH=292	12249000	5885200	491690		12055000	5819000	0.694711	0.620861	0.658535	1.37059	0.658521	0.0550173
>AT3G21630.1 | Symbols: CERK1, LYSM RLK1 | chitin elicitor receptor kinase 1 | chr3:7615543-7618530 REVERSE LENGTH=617	6779400	8534400			2954300	8830300	1.29948	0.623079	0.76489	1.15055	1.4484	0
>AT3G51580.2 | Symbols: | unknown protein; FUNCTIONS IN: molecular_function unknown; INVOLVED IN: biological_process unknown; LOCATED IN: endomembrane system; EXPRESSED IN: 24 plant structures; EXPRESSED DURING: 15 growth stages. | chr3:19131167-19133016	783600	1790700	1314300		908590	1253000	1.1993	0.624995	0.466133	0.725022	1.65684	1.21605
>AT5G20480.1 | Symbols: EFR | EF-TU receptor | chr5:6922497-6925679 FORWARD LENGTH=1031		671560	565590	513510	537830	1413900	0.752756	0.633708	0.439361	0	0.817235	0.688278
>AT1G32060.1 | Symbols: PRK | phosphoribulokinase | chr1:11532668-11534406 FORWARD LENGTH=395	54262000	230790000	120310000	142210000	23347000	140780000	1.32326	0.637444	0.873461	0.531395	2.26016	1.17821
>AT5G11280.1 | Symbols: | unknown protein; BEST Arabidopsis thaliana protein match is: unknown protein (TAIR:AT1G80200.1); Has 30201 Blast hits to 17322 proteins in 780 species: Archae - 12; Bacteria - 1396; Metazoa - 17338; Fungi - 3422; Plants - 5037; V	16319000	17091000	15707000	21963000	5993400	14137000	1.16686	0.639526	0.0494286	1.16306	1.21808	1.11944
>AT3G49750.1 | Symbols: AtRLP44, RLP44 | receptor like protein 44 | chr3:18450604-18451428 REVERSE LENGTH=274;>AT5G65830.1 | Symbols: ATRLP57, RLP57 | receptor like protein 57 | chr5:26342396-26343235 REVERSE LENGTH=279	11697000	7042100	3497600	1416700	5041100	10450000	1.31517	0.642102	0.729642	2.07543	1.2495	0.620589
>AT1G28340.1 | Symbols: AtRLP4, RLP4 | receptor like protein 4 | chr1:9940175-9943252 FORWARD LENGTH=626	16270000	7638200	8084600	14575000	4931800	6418400	1.23404	0.648109	0.562368	1.88272	0.883874	0.93553
>AT1G56340.1 | Symbols: CRT1, CRT1a, AtCRT1a | calreticulin 1a | chr1:21090059-21092630 REVERSE LENGTH=425	293760000	164580000	421910000	418520000	105170000	182620000	1.24627	0.654211	0.546497	1.24772	0.699041	1.79203
>AT2G35770.1 | Symbols: scpl28 | serine carboxypeptidase-like 28 | chr2:15034179-15036497 REVERSE LENGTH=462	1863800	1347800			1631300	1245000	1.11657	0.654787	0.66915	1.29597	0.937176	0
>AT3G06300.1 | Symbols: AT-P4H-2 | P4H isoform 2 | chr3:1907744-1909675 FORWARD LENGTH=299	11003000	9153100	11698000	5112000	10293000	13018000	1.12072	0.663653	0.138838	1.16135	0.966094	1.2347
>AT1G21750.1 | Symbols: ATPDIL1-1, ATPDI5, PDI5, PDIL1-1 | PDI-like 1-1 | chr1:7645767-7648514 FORWARD LENGTH=501	28010000	31132000	23112000	34850000	11895000	25788000	1.13402	0.670583	0.167206	1.15851	1.28763	0.955924
>AT1G65900.1 | Symbols: | unknown protein; FUNCTIONS IN: molecular_function unknown; INVOLVED IN: biological_process unknown; LOCATED IN: endomembrane system; EXPRESSED IN: 21 plant structures; EXPRESSED DURING: 13 growth stages; Has 306 Blast hits to 306	5343900	1643700	7157100	8949300	4735500	3320900	0.831762	0.704825	0.495717	0.942725	0.289967	1.26259
>AT5G21105.1 | Symbols: | Plant L-ascorbate oxidase | chr5:7172727-7177409 FORWARD LENGTH=588	9846600	18250000	9588400	14161000	8760400	10827000	1.11665	0.707144	0.438059	0.875295	1.6223	0.852343
>AT5G13690.1 | Symbols: CYL1, NAGLU | alpha-N-acetylglucosaminidase family / NAGLU family | chr5:4415808-4420159 FORWARD LENGTH=806	8753100	4863400	3052800	4100700	2226800	7563800	1.19998	0.707349	0.629025	1.89034	1.05031	0.65929
>AT3G16860.1 | Symbols: COBL8 | COBRA-like protein 8 precursor | chr3:5759643-5762104 REVERSE LENGTH=653	914630	575670	1644800	1803600		752460	0.817691	0.707788	0.427505	0.715656	0.450435	1.28698
>AT5G51550.1 | Symbols: EXL3 | EXORDIUM like 3 | chr5:20939793-20940806 REVERSE LENGTH=337	20952000	34757000	51536000	45267000	19127000	29074000	1.1474	0.714043	0.491593	0.672487	1.11558	1.65413
>AT1G42480.3 | Symbols: | unknown protein; FUNCTIONS IN: molecular_function unknown; INVOLVED IN: biological_process unknown; LOCATED IN: endomembrane system; EXPRESSED IN: 24 plant structures; EXPRESSED DURING: 13 growth stages; CONTAINS InterPro DOMAIN/	8497500	11106000	8530800	7791100	13876000	2439800	1.16706	0.714269	0.186233	1.05748	1.38209	1.06162
>AT5G13640.1 | Symbols: ATPDAT, PDAT, PDAT1 | phospholipid:diacylglycerol acyltransferase | chr5:4393529-4397213 FORWARD LENGTH=671	6910800	3948100	9410300	10233000	2997300	3830600	1.18805	0.719847	0.480814	1.2152	0.694237	1.65471
>AT4G28100.1 | Symbols: | unknown protein; FUNCTIONS IN: molecular_function unknown; INVOLVED IN: biological_process unknown; LOCATED IN: anchored to plasma membrane, anchored to membrane; EXPRESSED IN: 23 plant structures; EXPRESSED DURING: 14 growth sta	4111700		1527400	4587900	2295400	3058600	0.850808	0.728638	0.627154	1.24072	0	0.460898
>AT1G52410.1 | Symbols: TSA1 | TSK-associating protein 1 | chr1:19520762-19525361 FORWARD LENGTH=755	7466200	7602100	11645000	11775000	4321800	7792200	1.11823	0.730957	0.298176	0.937611	0.954678	1.46239
>AT4G16120.1 | Symbols: ATSEB1, COBL7, SEB1 | COBRA-like protein-7 precursor | chr4:9116591-9119138 REVERSE LENGTH=661	12954000	13935000	6659800	11620000	12435000	11986000	0.930851	0.735287	0.328604	1.07827	1.15993	0.554352
>AT1G71220.1 | Symbols: EBS1, UGGT, PSL2 | UDP-glucose:glycoprotein glucosyltransferases;transferases, transferring hexosyl groups;transferases, transferring glycosyl groups | chr1:26841664-26851730 FORWARD LENGTH=1613	4881500	3123100	5529700	7648200	1768400	6181800	0.867672	0.736586	0.239495	0.938846	0.600658	1.06351
>AT1G54860.1 | Symbols: | Glycoprotein membrane precursor GPI-anchored | chr1:20457522-20458434 REVERSE LENGTH=200	2228400		9049800		5195200	9075900	0.790282	0.73964	0.660798	0.312295	0	1.26827
>AT2G39480.1 | Symbols: PGP6 | P-glycoprotein 6 | chr2:16478249-16484827 REVERSE LENGTH=1407	16587000	18293000		7163500	13091000	24771000	1.16201	0.741021	0.673289	1.10517	1.21884	0
>AT3G51740.1 | Symbols: IMK2 | inflorescence meristem receptor-like kinase 2 | chr3:19189248-19191842 FORWARD LENGTH=836	10803000	7093800	5045700	5878500	6788200	8399600	1.08906	0.750917	0.41559	1.53843	1.01021	0.718546
>AT5G20590.1 | Symbols: TBL5 | TRICHOME BIREFRINGENCE-LIKE 5 | chr5:6963517-6966006 FORWARD LENGTH=485	836200	884410			645910	1302400	0.883129	0.762407	0.510475	0.858385	0.907874	0
>AT1G76400.1 | Symbols: | Ribophorin I | chr1:28658713-28661672 REVERSE LENGTH=614	2521700	5881200	4230400	4817700	3187500	5797800	0.915258	0.767639	0.365102	0.548077	1.27824	0.919452
>AT5G63810.1 | Symbols: BGAL10 | beta-galactosidase 10 | chr5:25537242-25541315 FORWARD LENGTH=741	45747000	44039000	33072000	60980000	35291000	35436000	0.932813	0.769764	0.156668	1.04202	1.00311	0.753308
>AT1G56550.1 | Symbols: RXGT1 | RhamnoGalacturonan speci&#64257;c Xylosyltransferase 1 | chr1:21185836-21188070 REVERSE LENGTH=383	1077500	1350400	1097100	1804500		774260	0.911291	0.793704	0.118054	0.835673	1.04733	0.850874
>AT1G15000.1 | Symbols: scpl50 | serine carboxypeptidase-like 50 | chr1:5168613-5169947 FORWARD LENGTH=444	10909000	4744500	5422100	9730600	3594000	5559400	1.11606	0.797293	0.53704	1.73305	0.753733	0.86138
>AT4G05200.1 | Symbols: CRK25 | cysteine-rich RLK (RECEPTOR-like protein kinase) 25 | chr4:2679793-2682309 REVERSE LENGTH=675	1411200	2191400	709400	1791100	1433700	1445100	0.92336	0.801365	0.476249	0.906572	1.40778	0.455727
>AT1G21680.1 | Symbols: | DPP6 N-terminal domain-like protein | chr1:7613028-7615148 FORWARD LENGTH=706	3939800	2109600	2532200	2653900		2686100	1.07136	0.806964	0.358898	1.47558	0.790112	0.94839
>AT1G70530.1 | Symbols: CRK3 | cysteine-rich RLK (RECEPTOR-like protein kinase) 3 | chr1:26588750-26591379 REVERSE LENGTH=646	1236900	2458700			1680400	2343300	0.918458	0.835375	0.611058	0.614807	1.22211	0
>AT3G02110.1 | Symbols: scpl25 | serine carboxypeptidase-like 25 | chr3:370902-373637 REVERSE LENGTH=473	39165000	38807000	26704000	25241000	32108000	42973000	1.0434	0.836454	0.212115	1.17118	1.16047	0.798549
>AT4G36440.1 | Symbols: | unknown protein; FUNCTIONS IN: molecular_function unknown; INVOLVED IN: biological_process unknown; LOCATED IN: endomembrane system; EXPRESSED IN: 24 plant structures; EXPRESSED DURING: 15 growth stages; Has 41 Blast hits to 41 p	1613200	1407500		1576400		1378700	1.0222	0.839521	0.594258	1.09181	0.95259	0
>AT2G38650.1 | Symbols: GAUT7, LGT7 | galacturonosyltransferase 7 | chr2:16161856-16165523 REVERSE LENGTH=619	960640	1471000		1603900	355760	1348300	1.10263	0.843729	0.677364	0.871208	1.33405	0
>AT2G15390.1 | Symbols: FUT4, atfut4 | fucosyltransferase 4 | chr2:6709345-6710856 REVERSE LENGTH=503	808560	2008300	1029900	1578900	1397700	1116100	0.939908	0.844729	0.467984	0.592685	1.47211	0.75493
>AT2G32810.1 | Symbols: BGAL9 | beta galactosidase 9 | chr2:13919410-13925325 REVERSE LENGTH=887	1206800	1534100		1703100	430330	1636000	1.09071	0.84846	0.643049	0.960464	1.22095	0
>AT4G08810.1 | Symbols: SUB1 | calcium ion binding | chr4:5616204-5617862 REVERSE LENGTH=552	18105000	18803000	9539300	16084000	10527000	17626000	1.04996	0.850954	0.349847	1.22782	1.27515	0.646922
>AT2G18030.2 | Symbols: | Peptide methionine sulfoxide reductase family protein | chr2:7840207-7841206 FORWARD LENGTH=192	7358500	5045700	6244300	1952900	8512000	6964100	1.06997	0.855203	0.199092	1.2666	0.868501	1.07481
>ENSEMBL:ENSBTAP00000024462 (Bos taurus) 47 kDa protein;>ENSEMBL:ENSBTAP00000024466 (Bos taurus) 44 kDa protein	3601700		2353100	4348300		2102800	0.923067	0.864668	0.566991	1.11662	0	0.729519
>AT1G09780.1 | Symbols: | Phosphoglycerate mutase, 2,3-bisphosphoglycerate-independent | chr1:3165550-3167812 REVERSE LENGTH=557	3672900	7113000	2923800	6214500	373470	5913200	1.09667	0.869214	0.536113	0.881413	1.70696	0.701646
>AT4G27020.1 | Symbols: | unknown protein; FUNCTIONS IN: molecular_function unknown; LOCATED IN: vacuole; BEST Arabidopsis thaliana protein match is: unknown protein (TAIR:AT5G54870.1); Has 1807 Blast hits to 1807 proteins in 277 species: Archae - 0; Bact	1746400	902280		1089300	530880	2012900	1.09357	0.870838	0.721174	1.44208	0.745054	0
>AT4G22010.1 | Symbols: sks4 | SKU5 similar 4 | chr4:11663429-11666463 FORWARD LENGTH=541	2434000		1082900	2498700		1345300	0.914906	0.87089	0.634475	1.26639	0	0.563424
>AT1G51470.1 | Symbols: BGLU35, TGG5 | beta glucosidase 35 | chr1:19087424-19090248 FORWARD LENGTH=511	219450000	174020000	57906000	204250000	120660000	153920000	0.942664	0.873392	0.521956	1.37491	1.09028	0.362797
>AT1G66250.1 | Symbols: | O-Glycosyl hydrolases family 17 protein | chr1:24693063-24695416 FORWARD LENGTH=505	11957000	10131000	15136000	11927000	9866800	14453000	1.02696	0.876946	0.209629	0.989632	0.838502	1.25275
>AT1G48480.1 | Symbols: RKL1 | receptor-like kinase 1 | chr1:17918475-17920743 FORWARD LENGTH=655	3416700	1713500	1478100	1937300	2909200	2098000	0.951588	0.877235	0.456994	1.476	0.740226	0.638534
>AT5G63140.1 | Symbols: ATPAP29, PAP29 | purple acid phosphatase 29 | chr5:25328237-25329616 FORWARD LENGTH=389	5120700	3726700		2466900	2815900	7034900	1.0774	0.8818	0.644785	1.24716	0.907645	0
>AT4G16210.1 | Symbols: ECHIA, E-COAH-2 | enoyl-CoA hydratase/isomerase A | chr4:9176864-9177978 REVERSE LENGTH=265	5054700	9116700		2489200	12177000	8499300	0.917619	0.882202	0.591485	0.654598	1.18064	0
>AT4G04570.1 | Symbols: CRK40 | cysteine-rich RLK (RECEPTOR-like protein kinase) 40 | chr4:2290045-2292717 FORWARD LENGTH=654	943050	562250		778410	672870	884810	0.966551	0.882779	0.609256	1.21106	0.72204	0
>AT3G12740.1 | Symbols: ALIS1 | ALA-interacting subunit 1 | chr3:4049739-4051561 FORWARD LENGTH=350	2303400	3169700			2635200	2697700	1.02629	0.886596	0.614393	0.863845	1.18873	0
>AT5G49720.1 | Symbols: ATGH9A1, TSD1, DEC, KOR, RSW2, IRX2, KOR1, GH9A1 | glycosyl hydrolase 9A1 | chr5:20197765-20200168 REVERSE LENGTH=621	10114000	48477000	28447000	32150000	18105000	42607000	0.937283	0.889837	0.61988	0.326743	1.5661	0.919009
>AT1G02180.1 | Symbols: | ferredoxin-related | chr1:413619-414505 REVERSE LENGTH=226	4719400	3776800	8284900	7690700	4255500	4054900	1.04875	0.892739	0.445811	0.884827	0.708101	1.55331
>AT1G11960.1 | Symbols: | ERD (early-responsive to dehydration stress) family protein | chr1:4039871-4043143 REVERSE LENGTH=771	880270	853210			161460	1390800	1.11675	0.89635	0.644989	1.13418	1.09931	0
>AT4G33430.1 | Symbols: BAK1, RKS10, SERK3, ELG, ATSERK3, ATBAK1 | BRI1-associated receptor kinase | chr4:16086654-16090288 REVERSE LENGTH=615	15076000	8347300	9995600	14046000	6766400	11610000	1.03073	0.915651	0.324516	1.39496	0.772364	0.924879
>AT5G34850.1 | Symbols: ATPAP26, PAP26 | purple acid phosphatase 26 | chr5:13108475-13111217 REVERSE LENGTH=475	18798000	11032000	8653200	23066000	1315600	12268000	1.05003	0.934489	0.434284	1.53873	0.903039	0.708319
>AT5G62630.1 | Symbols: HIPL2 | hipl2 protein precursor | chr5:25143719-25146390 REVERSE LENGTH=696	21539000	23102000	26013000	17033000	31402000	21225000	1.01427	0.944385	0.0977861	0.927606	0.994918	1.12028
>AT2G28470.1 | Symbols: BGAL8 | beta-galactosidase 8 | chr2:12169047-12173164 REVERSE LENGTH=852	7146100	12509000	7769800	10310000	4240700	13566000	0.975395	0.946257	0.31293	0.762476	1.33469	0.829023
>AT3G26720.1 | Symbols: | Glycosyl hydrolase family 38 protein | chr3:9816707-9823056 FORWARD LENGTH=1019	22162000	18784000	11890000	20431000	16661000	15024000	1.01382	0.947428	0.301366	1.27573	1.08128	0.684435
>AT1G73080.1 | Symbols: PEPR1, ATPEPR1 | PEP1 receptor 1 | chr1:27484513-27488021 FORWARD LENGTH=1123	8736600	8672600	3780000	4239500	7121900	9446700	1.01831	0.957263	0.409946	1.2596	1.25037	0.54498
>AT3G26650.1 | Symbols: GAPA, GAPA-1 | glyceraldehyde 3-phosphate dehydrogenase A subunit | chr3:9795226-9796848 FORWARD LENGTH=396	23952000	15431000	5600600	13906000	550490	32252000	0.963071	0.959378	0.589838	1.53839	0.991105	0.359716
>AT4G14746.1 | Symbols: | CONTAINS InterPro DOMAIN/s: EGF-like (InterPro:IPR006210); Has 259 Blast hits to 234 proteins in 55 species: Archae - 0; Bacteria - 0; Metazoa - 184; Fungi - 0; Plants - 69; Viruses - 0; Other Eukaryotes - 6 (source: NCBI BLink).	17976000	14449000		18999000	16202000	13095000	1.00707	0.967376	0.591662	1.11661	0.897528	0
>AT1G52780.1 | Symbols: | Protein of unknown function (DUF2921) | chr1:19658846-19662025 FORWARD LENGTH=1059	3107400	2589600	2052900	3038900		2165300	0.992775	0.972929	0.202636	1.19419	0.995196	0.78894
>AT1G51840.1 | Symbols: | protein kinase-related | chr1:19249449-19250150 REVERSE LENGTH=180	11500000		6529300	13641000	4655800	9099900	0.987124	0.977418	0.631563	1.25928	0	0.714973
>AT3G60130.1 | Symbols: BGLU16 | beta glucosidase 16 | chr3:22210343-22213650 FORWARD LENGTH=514	7975100	6478200	4177700	8512600	2243900	8079400	0.989122	0.977764	0.304655	1.2702	1.03179	0.665384
>AT4G12910.1 | Symbols: scpl20 | serine carboxypeptidase-like 20 | chr4:7550576-7553051 REVERSE LENGTH=497	2133600	1658000	732370		1450700	1544000	1.00711	0.985306	0.475879	1.42492	1.10729	0.489111
>AT3G09090.1 | Symbols: DEX1 | defective in exine formation protein (DEX1) | chr3:2782912-2787552 REVERSE LENGTH=896	577340	586330	987420		456750	981400	0.997156	0.994265	0.325707	0.802893	0.815395	1.37318
>AT1G76160.1 | Symbols: sks5 | SKU5 similar 5 | chr1:28578211-28581020 REVERSE LENGTH=541	39147000	39300000	34172000	57657000	19035000	35891000	1.00032	0.999204	0.0777423	1.04315	1.04723	0.910582

## Sheet: cgl1
Fasta headers	iBAQ C1	iBAQ C2	iBAQ C3	iBAQ NC1	iBAQ NC2	iBAQ NC3	Ratio(C/NC)	T-test P value	SD	R1	R2	R3
>AT3G32980.1 | Symbols: PRX32, ATPRX32, peroxidase superfamily protein	11904000	12924000	9378300	4329900	7012200	5463100	2.03546	0.0114293	0.325856	2.12506	2.30714	1.67418
>AT3G49120.1 | Symbols: ATPERX34, PERX34, PRXCB, ATPCB, PRX34 | peroxidase CB | chr3:18207819-18210041 FORWARD LENGTH=353		953980000	924460000	763680000	640700000	697000000	1.34086	0.0148976	0.0298001		1.36193	1.31979
>AT5G67400.1 | Symbols: RHS19 | root hair specific 19 | chr5:26894896-26896300 FORWARD LENGTH=329	4919300	3450300	4150100	29308000	25474000	23303000	0.160334	0.000267506	0.0282297	0.188998	0.132559	0.159445
>AT5G64570.1 | Symbols: XYL4, ATBXL4 | beta-D-xylosidase 4 | chr5:25810227-25813309 REVERSE LENGTH=784	19902000	18611000	21708000	40134000		42384000	0.486528	0.00066854	0.0377038	0.482367	0.451077	0.52614
>AT3G62020.2 | Symbols: GLP10 | germin-like protein 10 | chr3:22971443-22972018 REVERSE LENGTH=191		33286000	34074000	12779000	7739400	7894400	3.55614	0.00151478	0.0588327		3.51454	3.59774
>AT4G27080.1 | Symbols: ATPDIL5-4, ATPDI7, PDI7, PDIL5-4 | PDI-like 5-4 | chr4:13589156-13593335 FORWARD LENGTH=480	8867600	10497000		42144000		39894000	0.236044	0.00195898	0.0280884	0.216183	0.255906
>AT1G76160.1 | Symbols: sks5 | SKU5 similar 5 | chr1:28578211-28581020 REVERSE LENGTH=541	16614000	10236000	12670000	44629000		40351000	0.310034	0.00202133	0.0757508	0.39101	0.240904	0.298188
>AT3G15950.1 | Symbols: NAI2 | DNA topoisomerase-related | chr3:5397783-5402610 REVERSE LENGTH=772	29592000		32475000	7137500		7810700	4.15214	0.0039246	0.272754	3.95927		4.345
>AT3G07390.1 | Symbols: AIR12 | auxin-responsive family protein | chr3:2365452-2366273 FORWARD LENGTH=273		72195000	79232000		9919400	15306000	6.00296	0.0048948	0.394516		5.72399	6.28192
>AT5G21105.1 | Symbols: | Plant L-ascorbate oxidase | chr5:7172727-7177409 FORWARD LENGTH=588		16873000	17271000		9374700	8132600	1.95027	0.00609037	0.0321498		1.92754	1.97301
>AT3G17840.1 | Symbols: RLK902 | receptor-like kinase 902 | chr3:6106092-6108430 FORWARD LENGTH=647		25616000	26092000	15082000	9470100	11355000	2.16007	0.00739343	0.0281211		2.14019	2.17996
>AT2G01310.1 | Symbols: | BEST Arabidopsis thaliana protein match is: cyclin-dependent protein kinase 3;2 (TAIR:AT1G47210.1); Has 37 Blast hits to 37 proteins in 6 species: Archae - 0; Bacteria - 0; Metazoa - 0; Fungi - 0; Plants - 37; Viruses - 0; Other	102540000		116150000	18680000	48548000	23892000	3.60003	0.00881573	0.316848	3.37599		3.82408
>AT1G41830.1 | Symbols: SKS6 | SKU5-similar 6 | chr1:15603892-15607802 REVERSE LENGTH=542	19843000	19188000	15329000	88140000		61204000	0.242661	0.0115738	0.032665	0.265735	0.256964	0.205284
>AT3G14310.1 | Symbols: ATPME3, PME3 | pectin methylesterase 3 | chr3:4772214-4775095 REVERSE LENGTH=592		26908000	21012000	11600000	9835800	7911300	2.44931	0.0120141	0.426185		2.75066	2.14795
>AT1G59970.1 | Symbols: | Matrixin family protein | chr1:22073601-22074683 FORWARD LENGTH=360	4730300	4221400	4761300	8343300	8417700	6255800	0.595782	0.0131671	0.0395136	0.616545	0.550215	0.620586
>AT3G09090.1 | Symbols: DEX1 | defective in exine formation protein (DEX1) | chr3:2782912-2787552 REVERSE LENGTH=896	574530	1052700	894280	2116600	1477300	1873300	0.461207	0.013623	0.133658	0.31526	0.577645	0.490716
>AT1G68560.1 | Symbols: ATXYL1, XYL1, TRG1 | alpha-xylosidase 1 | chr1:25734435-25737897 REVERSE LENGTH=915	35937000	38939000		87261000		77110000	0.45553	0.0137036	0.0258286	0.437267	0.473794
>AT3G16860.1 | Symbols: COBL8 | COBRA-like protein 8 precursor | chr3:5759643-5762104 REVERSE LENGTH=653	251590	329040	387060	695610	598350		0.498568	0.0137597	0.105052	0.388868	0.508578	0.598257
>AT4G33430.1 | Symbols: BAK1, RKS10, SERK3, ELG, ATSERK3, ATBAK1 | BRI1-associated receptor kinase | chr4:16086654-16090288 REVERSE LENGTH=615	4773900	5083700	5916500	10712000		8659300	0.542868	0.0152595	0.0610091	0.492884	0.524869	0.610852
>AT1G74380.1 | Symbols: XXT5 | xyloglucan xylosyltransferase 5 | chr1:27959848-27961221 FORWARD LENGTH=457		708740	637460	2659800		2208400	0.276529	0.0164225	0.0207069		0.291171	0.261887
>AT1G42970.1 | Symbols: GAPB | glyceraldehyde-3-phosphate dehydrogenase B subunit | chr1:16127552-16129584 FORWARD LENGTH=447	3408700	3110500	6688100	12423000		11234000	0.372189	0.0171296	0.167819	0.288177	0.262967	0.565422
>AT1G08470.1 | Symbols: SSL3 | strictosidine synthase-like 3 | chr1:2682262-2683977 REVERSE LENGTH=390	2860600	3900200	5741800	10391000		9202500	0.4254	0.017269	0.148936	0.291995	0.398112	0.586092
>AT5G48380.1 | Symbols: BIR1 | BAK1-interacting receptor-like kinase 1 | chr5:19604584-19606532 REVERSE LENGTH=620	1310100	1136100	1977500	3004600		3131500	0.48062	0.0175543	0.144769	0.427014	0.3703	0.644546
>AT3G18080.1 | Symbols: BGLU44 | B-S glucosidase 44 | chr3:6191586-6194124 FORWARD LENGTH=512;>AT3G18070.1 | Symbols: BGLU43 | beta glucosidase 43 | chr3:6187294-6189947 FORWARD LENGTH=501		6412300	7074200	30013000		24166000	0.248925	0.0202768	0.0172773		0.236708	0.261142
>ATCG00680.1 | Symbols: PSBB | photosystem II reaction center protein B | chrC:72371-73897 FORWARD LENGTH=508	6541000	7106400		95728000		71707000	0.0815086	0.0235517	0.00477556	0.0781318	0.0848855
>AT1G71220.1 | Symbols: EBS1, UGGT, PSL2 | UDP-glucose:glycoprotein glucosyltransferases;transferases, transferring hexosyl groups;transferases, transferring glycosyl groups | chr1:26841664-26851730 FORWARD LENGTH=1613	2490700	2504600	5069000	8481100		7840000	0.411096	0.0239425	0.181922	0.305212	0.306916	0.621159
>AT1G65590.1 | Symbols: HEXO3, ATHEX1 | beta-hexosaminidase 3 | chr1:24385996-24390989 FORWARD LENGTH=535	6470600	5621700	4218700		407190	1939100	4.63455	0.0250702	0.969407	5.5156	4.79199	3.59606
>AT1G10950.1 | Symbols: TMN1, AtTMN1 | transmembrane nine 1 | chr1:3659322-3663622 FORWARD LENGTH=589	1992000	2884900	7576900	15905000		24548000	0.205239	0.026257	0.148325	0.0984847	0.14263	0.374603
>AT4G18760.1 | Symbols: AtRLP51, RLP51 | receptor like protein 51 | chr4:10308163-10309458 REVERSE LENGTH=431	42921000	52146000	55778000	62804000	66615000	74466000	0.739853	0.0263192	0.0975278	0.631547	0.767285	0.820727
>AT5G06860.1 | Symbols: PGIP1, ATPGIP1 | polygalacturonase inhibiting protein 1 | chr5:2132373-2133434 FORWARD LENGTH=330	5088100		4543000	11675000	9540300	8406100	0.48771	0.0273819	0.039037	0.515313		0.460107
>AT4G26690.1 | Symbols: SHV3, MRH5, GPDL2 | PLC-like phosphodiesterase family protein | chr4:13456793-13459890 REVERSE LENGTH=759	123680000	103680000	127300000	176200000	162970000	141280000	0.738183	0.0288216	0.0794345	0.772276	0.647393	0.79488
>AT5G37780.1 | Symbols: CAM1, TCH1, ACAM-1 | calmodulin 1 | chr5:15004769-15006117 REVERSE LENGTH=149;>AT1G66410.1 | Symbols: CAM4, ACAM-4 | calmodulin 4 | chr1:24774431-24775785 REVERSE LENGTH=149	88378000		123850000	11633000		7465600	11.1122	0.03254	2.62663	9.25492		12.9695
>AT3G26650.1 | Symbols: GAPA, GAPA-1 | glyceraldehyde 3-phosphate dehydrogenase A subunit | chr3:9795226-9796848 FORWARD LENGTH=396	8186100	8930200		38986000		29458000	0.250077	0.0329643	0.0153749	0.239206	0.260949
>AT1G13900.1 | Symbols: | Purple acid phosphatases superfamily protein | chr1:4753494-4755554 REVERSE LENGTH=656	2541700	3070900	4837800	6654500		8106500	0.471982	0.033749	0.162911	0.34438	0.416083	0.655484
>AT5G49720.1 | Symbols: ATGH9A1, TSD1, DEC, KOR, RSW2, IRX2, KOR1, GH9A1 | glycosyl hydrolase 9A1 | chr5:20197765-20200168 REVERSE LENGTH=621	4251900	15756000	13883000	56922000	26834000	37001000	0.280654	0.0384415	0.153349	0.105631	0.391431	0.344899
>AT5G63810.1 | Symbols: BGAL10 | beta-galactosidase 10 | chr5:25537242-25541315 FORWARD LENGTH=741	18039000	20728000	31919000	60271000	37205000	70111000	0.421787	0.0385351	0.131774	0.322919	0.371055	0.571387
>AT5G19690.1 | Symbols: STT3A | staurosporin and temperature sensitive 3-like A | chr5:6652649-6658214 FORWARD LENGTH=779	1313800	898160	992130	5218200		2963100	0.261091	0.0386071	0.0532843	0.321171	0.219564	0.242536
>AT2G33530.1 | Symbols: scpl46 | serine carboxypeptidase-like 46 | chr2:14197866-14200536 REVERSE LENGTH=465		4456500	5464500	7669800		8430600	0.616196	0.0393202	0.0885399		0.553589	0.678803
>AT3G26720.1 | Symbols: | Glycosyl hydrolase family 38 protein | chr3:9816707-9823056 FORWARD LENGTH=1019	8782200	7985900	12203000	21237000	13157000	21273000	0.520436	0.0410282	0.120747	0.473289	0.430375	0.657643
>AT1G66970.1 | Symbols: SVL2 | SHV3-like 2 | chr1:24992746-24996005 REVERSE LENGTH=763	2803400	10855000	14453000	43819000	19221000	42631000	0.266028	0.0413251	0.169346	0.0795885	0.308173	0.410321
>AT2G01270.1 | Symbols: AtQSOX2, QSOX2 | quiescin-sulfhydryl oxidase 2 | chr2:139457-142141 FORWARD LENGTH=495	1914900	2328500		8561600	6285200		0.285812	0.0444603	0.039397	0.257955	0.31367
>AT2G28470.1 | Symbols: BGAL8 | beta-galactosidase 8 | chr2:12169047-12173164 REVERSE LENGTH=852	1390500	3433800			7422000	6978100	0.335019	0.0445207	0.20067	0.193124	0.476913
>AT1G67830.1 | Symbols: ATFXG1, FXG1 | alpha-fucosidase 1 | chr1:25431705-25432972 REVERSE LENGTH=372	14670000	16142000	13886000	13275000	11643000	10187000	1.27327	0.0450139	0.0978793	1.25367	1.37946	1.18667
>AT1G17100.1 | Symbols: | SOUL heme-binding family protein | chr1:5844766-5845539 FORWARD LENGTH=232	70425000	86041000	77350000	66687000	43127000	37203000	1.5904	0.0453779	0.159668	1.43708	1.75574	1.57839
>AT3G11650.1 | Symbols: NHL2 | NDR1/HIN1-like 2 | chr3:3676264-3676986 REVERSE LENGTH=240		10370000	11475000	7601400		6151900	1.58835	0.0471761	0.113624		1.508	1.66869
>AT1G03870.1 | Symbols: FLA9 | FASCICLIN-like arabinoogalactan 9 | chr1:982625-983368 REVERSE LENGTH=247	3998000	3621800		1618300	1390800	2804800	1.96593	0.0489309	0.137264	2.06299	1.86887
>AT4G37800.1 | Symbols: XTH7 | xyloglucan endotransglucosylase/hydrolase 7 | chr4:17775703-17777372 REVERSE LENGTH=293;>AT1G11545.1 | Symbols: XTH8 | xyloglucan endotransglucosylase/hydrolase 8 | chr1:3878689-3880286 REVERSE LENGTH=305;>AT5G65730.1 | Symbo		751900	3065700	6562900	5398900	9308200	0.269224	0.0576494	0.230762		0.106051	0.432398
>AT1G73080.1 | Symbols: PEPR1, ATPEPR1 | PEP1 receptor 1 | chr1:27484513-27488021 FORWARD LENGTH=1123	1354000	2813500	5512700	9515800	7717300	5303600	0.42953	0.067814	0.280865	0.180239	0.374522	0.73383
>AT5G23210.1 | Symbols: SCPL34 | serine carboxypeptidase-like 34 | chr5:7810892-7814837 FORWARD LENGTH=499	4467700	8841900	5116100	2740200	558780	3366300	2.76443	0.0712217	1.06251	2.01088	3.97968	2.30272
>AT4G01080.1 | Symbols: TBL26 | TRICHOME BIREFRINGENCE-LIKE 26 | chr4:466626-468275 REVERSE LENGTH=442	1669000		2139200	1413500	677850	932580	1.88903	0.0723173	0.329851	1.65579		2.12227
>AT1G79340.1 | Symbols: AtMC4, MC4 | metacaspase 4 | chr1:29842849-29844368 FORWARD LENGTH=418	7240000	4676200	12177000	3336500	1051600	3004400	3.25914	0.0738652	1.54716	2.93811	1.89768	4.94163
>AT3G52720.1 | Symbols: CAH1, ATACA1, ACA1 | alpha carbonic anhydrase 1 | chr3:19538804-19541116 REVERSE LENGTH=284	19560000	22695000	24133000	51624000	68358000	28957000	0.44574	0.0748824	0.047101	0.393987	0.457133	0.486098
>AT3G07570.1 | Symbols: | Cytochrome b561/ferric reductase transmembrane with DOMON related domain | chr3:2418205-2420206 REVERSE LENGTH=369		6198400	8033800	16945000		12283000	0.486937	0.0958506	0.0888069		0.424141	0.549733
>AT1G30570.1 | Symbols: HERK2 | hercules receptor kinase 2 | chr1:10828933-10831482 FORWARD LENGTH=849	440050		462660	835420		1251600	0.432535	0.104752	0.0153211	0.421702		0.443369
>AT2G34930.1 | Symbols: | disease resistance family protein / LRR family protein | chr2:14737169-14739886 REVERSE LENGTH=905	632000		219970	4782300	1862700	2553700	0.138928	0.104919	0.0950186	0.206116		0.0717395
>AT4G33220.1 | Symbols: PME44, ATPME44 | pectin methylesterase 44 | chr4:16022506-16026130 FORWARD LENGTH=525	2723700	2291900	2480700	5922400	2854200	4314400	0.57263	0.105533	0.0496065	0.624177	0.525223	0.56849
>AT1G28290.1 | Symbols: AGP31 | arabinogalactan protein 31 | chr1:9889331-9890843 REVERSE LENGTH=359	14859000	26570000	26303000	75191000		36322000	0.404927	0.118912	0.119907	0.266498	0.476536	0.471748
>AT5G60360.1 | Symbols: SAG2, AALP, ALP | aleurain-like protease | chr5:24280044-24282152 FORWARD LENGTH=358	10118000	5283500	3278200	3038800	1499100	1881800	2.90975	0.12117	1.6431	4.72826	2.46904	1.53194
>AT4G08810.1 | Symbols: SUB1 | calcium ion binding | chr4:5616204-5617862 REVERSE LENGTH=552	1015800	6547200	6435700	16172000	6650300	10036000	0.426032	0.132194	0.288681	0.0927437	0.597767	0.587587
>AT2G35780.1 | Symbols: scpl26 | serine carboxypeptidase-like 26 | chr2:15037733-15040104 REVERSE LENGTH=452	5494400	11908000	15863000	16905000	16030000	17051000	0.665494	0.14046	0.314047	0.329756	0.71468	0.952047
>AT3G14920.1 | Symbols: | Peptide-N4-(N-acetyl-beta-glucosaminyl)asparagine amidase A protein | chr3:5018275-5020104 FORWARD LENGTH=609	2703400	3162200	2911100	3101600	4523500	3554200	0.785085	0.142769	0.0616519	0.725466	0.848586	0.781203
>AT3G49750.1 | Symbols: AtRLP44, RLP44 | receptor like protein 44 | chr3:18450604-18451428 REVERSE LENGTH=274;>AT5G65830.1 | Symbols: ATRLP57, RLP57 | receptor like protein 57 | chr5:26342396-26343235 REVERSE LENGTH=279	3453200		2150400	5296000		4198200	0.590213	0.14982	0.194059	0.727434		0.452992
>AT3G51580.2 | Symbols: | unknown protein; FUNCTIONS IN: molecular_function unknown; INVOLVED IN: biological_process unknown; LOCATED IN: endomembrane system; EXPRESSED IN: 24 plant structures; EXPRESSED DURING: 15 growth stages. | chr3:19131167-19133016	2857600	4419600	2124500	1855100	1193600	2334100	1.74662	0.149945	0.653321	1.59263	2.46318	1.18405
>AT5G11280.1 | Symbols: | unknown protein; BEST Arabidopsis thaliana protein match is: unknown protein (TAIR:AT1G80200.1); Has 30201 Blast hits to 17322 proteins in 780 species: Archae - 12; Bacteria - 1396; Metazoa - 17338; Fungi - 3422; Plants - 5037; V	20470000	23273000	21250000	17448000	9287300	20283000	1.38229	0.152833	0.092307	1.30609	1.48493	1.35586
>AT5G26000.2 | Symbols: TGG1, BGLU38 | thioglucoside glucohydrolase 1 | chr5:9080009-9082347 REVERSE LENGTH=456	609460000	711390000	701860000	643800000	605170000	571460000	1.11112	0.155955	0.0927807	1.00437	1.17234	1.15664
>AT1G74790.1 | Symbols: | catalytics | chr1:28098912-28101673 FORWARD LENGTH=695	39496000	62000000	75191000	78979000	69574000	82624000	0.764293	0.177788	0.234221	0.512542	0.804578	0.975759
>AT3G45600.1 | Symbols: TET3 | tetraspanin3 | chr3:16733973-16735854 REVERSE LENGTH=285	7912500	8185200	7358100		4713500	7339700	1.29735	0.179627	0.0699349	1.31293	1.35818	1.22094
>AT1G21270.1 | Symbols: WAK2 | wall-associated kinase 2 | chr1:7444997-7447345 FORWARD LENGTH=732		402450	907370	856430	1320300	1755300	0.499673	0.186453	0.272403		0.307055	0.692291
>AT1G15000.1 | Symbols: scpl50 | serine carboxypeptidase-like 50 | chr1:5168613-5169947 FORWARD LENGTH=444	3744500	4426400	3541200	2787900	3534200	3604600	1.17986	0.186834	0.140126	1.13164	1.33773	1.0702
>AT4G37160.1 | Symbols: sks15 | SKU5 similar 15 | chr4:17494820-17497124 REVERSE LENGTH=541;>AT2G23630.1 | Symbols: sks16 | SKU5 similar 16 | chr2:10052581-10055311 REVERSE LENGTH=541	854870		832930	14695000	2820900	7592300	0.100832	0.189653	0.00185365	0.102142		0.0995209
>AT5G43600.1 | Symbols: ATAAH-2, UAH | ureidoglycolate amidohydrolase | chr5:17512651-17515280 FORWARD LENGTH=476		3343800	5528500	7877800	5991200	5603000	0.683466	0.190452	0.238006		0.515171	0.851762
>AT5G55480.1 | Symbols: SVL1 | SHV3-like 1 | chr5:22474277-22477819 FORWARD LENGTH=766	24713000	24968000	25001000	35567000	58139000	25748000	0.625195	0.194623	0.00395843	0.620649	0.627053	0.627882
>AT1G42480.3 | Symbols: | unknown protein; FUNCTIONS IN: molecular_function unknown; INVOLVED IN: biological_process unknown; LOCATED IN: endomembrane system; EXPRESSED IN: 24 plant structures; EXPRESSED DURING: 13 growth stages; CONTAINS InterPro DOMAIN/	7265900	6694200	12085000	7454100	5266900	4237500	1.53581	0.196251	0.523839	1.28536	1.18422	2.13787
>AT1G29930.1 | Symbols: CAB1, AB140, CAB140, LHCB1.3 | chlorophyll A/B binding protein 1 | chr1:10478071-10478874 FORWARD LENGTH=267;>AT1G29910.1 | Symbols: CAB3, AB180, LHCB1.2 | chlorophyll A/B binding protein 3 | chr1:10472443-10473246 REVERSE LENGTH=26	117250000	67483000	74800000	46124000	27125000	82233000	1.66922	0.196496	0.518471	2.26232	1.30207	1.44325
>AT5G13640.1 | Symbols: ATPDAT, PDAT, PDAT1 | phospholipid:diacylglycerol acyltransferase | chr5:4393529-4397213 FORWARD LENGTH=671	2682800	5189900	3924900	7126300	3697100	10451000	0.554544	0.203408	0.176771	0.378314	0.731851	0.553468
>AT5G40170.1 | Symbols: AtRLP54, RLP54 | receptor like protein 54 | chr5:16065179-16067557 REVERSE LENGTH=792		629550	1610400	4173300	1420800	3049800	0.388705	0.205904	0.240713		0.218495	0.558914
>AT4G22130.1 | Symbols: SRF8 | STRUBBELIG-receptor family 8 | chr4:11723733-11727331 FORWARD LENGTH=703	1509300	1841700	1930300	2664900	1855300	1990300	0.811197	0.218957	0.102275	0.695477	0.848644	0.889471
>AT1G01430.1 | Symbols: TBL25 | TRICHOME BIREFRINGENCE-LIKE 25 | chr1:156953-158536 REVERSE LENGTH=456	670860	2287200	2708200	11180000	3408000	2986300	0.322417	0.220341	0.183597	0.114518	0.390434	0.4623
>AT5G62220.1 | Symbols: ATGT18, GT18 | glycosyltransferase 18 | chr5:24988456-24990009 REVERSE LENGTH=517		1026700	1005700	882190		507330	1.46266	0.228973	0.844604	0	1.47778	1.44755
>AT3G12740.1 | Symbols: ALIS1 | ALA-interacting subunit 1 | chr3:4049739-4051561 FORWARD LENGTH=350	1215000		1233100	1889700		1392700	0.745826	0.235433	0.430638	0.740312	0	0.75134
>AT2G14740.1 | Symbols: ATVSR3, VSR3, VSR2;2, BP80-2;2 | vaculolar sorting receptor 3 | chr2:6308895-6312303 FORWARD LENGTH=628;>AT2G14720.1 | Symbols: VSR4, VSR2;1, BP80-2;1, MTV4 | vacuolar sorting receptor 4 | chr2:6300878-6304156 REVERSE LENGTH=628	13329000	19569000	22080000	37400000	20173000	22353000	0.687861	0.238535	0.16913	0.5003	0.734517	0.828767
>AT2G32810.1 | Symbols: BGAL9 | beta galactosidase 9 | chr2:13919410-13925325 REVERSE LENGTH=887	726170	1023300	1164900	2576000		1071800	0.532626	0.241057	0.122766	0.398141	0.56105	0.638686
>AT1G61900.1 | Symbols: | unknown protein; FUNCTIONS IN: molecular_function unknown; INVOLVED IN: biological_process unknown; LOCATED IN: anchored to plasma membrane, plasma membrane, anchored to membrane; EXPRESSED IN: 23 plant structures; EXPRESSED DURI	53303000	63632000	64641000	57510000	56939000	48838000	1.11201	0.253878	0.115288	0.979312	1.16908	1.18762
>AT1G06680.1 | Symbols: PSBP-1, OEE2, PSII-P, OE23 | photosystem II subunit P-1 | chr1:2047940-2049186 FORWARD LENGTH=263	54604000	52343000	72791000	62947000	29895000	40390000	1.34906	0.255917	0.252419	1.22952	1.17861	1.63904
>AT3G44330.1 | Symbols: | INVOLVED IN: protein processing; LOCATED IN: mitochondrion, endoplasmic reticulum, plasma membrane, vacuole; EXPRESSED IN: 25 plant structures; EXPRESSED DURING: 13 growth stages; CONTAINS InterPro DOMAIN/s: Nicalin (InterPro:IPR	4677700	2493400	4351000	20446000	2305900	9813200	0.353817	0.256728	0.108537	0.430925	0.2297	0.400828
>AT1G21680.1 | Symbols: | DPP6 N-terminal domain-like protein | chr1:7613028-7615148 FORWARD LENGTH=706	2039700	1036800	1186500	4186900	1032300	2789800	0.532276	0.265171	0.202652	0.764028	0.388363	0.444438
>AT4G33380.1 | Symbols: | unknown protein; Has 194 Blast hits to 189 proteins in 23 species: Archae - 0; Bacteria - 0; Metazoa - 0; Fungi - 0; Plants - 184; Viruses - 0; Other Eukaryotes - 10 (source: NCBI BLink). | chr4:16072064-16074605 FORWARD LENGTH=3	486350		901250	1545900	798570	1029100	0.616973	0.276315	0.401145	0.432494	0	0.801451
>AT1G70520.1 | Symbols: CRK2 | cysteine-rich RLK (RECEPTOR-like protein kinase) 2 | chr1:26584888-26587334 REVERSE LENGTH=649	492810	2876300	1781500	6482000	1933500	2658700	0.4651	0.276951	0.3232	0.133502	0.779189	0.482608
>AT1G19570.1 | Symbols: DHAR1, ATDHAR1, DHAR5 | dehydroascorbate reductase | chr1:6773462-6774413 REVERSE LENGTH=213	34259000	23584000	53645000	41987000	7989500	8464500	1.9077	0.283479	0.782297	1.75865	1.21066	2.7538
>AT1G52410.1 | Symbols: TSA1 | TSK-associating protein 1 | chr1:19520762-19525361 FORWARD LENGTH=755	2730600	7955900	10721000	13003000	10866000	7796500	0.676051	0.287258	0.38444	0.258698	0.753745	1.01571
>AT1G76400.1 | Symbols: | Ribophorin I | chr1:28658713-28661672 REVERSE LENGTH=614	5724100	613500	4109000	10746000	2421700	7790700	0.498445	0.288522	0.373929	0.819352	0.0878168	0.588165
>AT1G08660.1 | Symbols: MGP2 | MALE GAMETOPHYTE DEFECTIVE 2 | chr1:2757116-2759677 REVERSE LENGTH=474		456780	784480	1124500	671290	865070	0.699732	0.292141	0.444224	0	0.514999	0.884466
>AT3G60900.1 | Symbols: FLA10 | FASCICLIN-like arabinogalactan-protein 10 | chr3:22499573-22500841 REVERSE LENGTH=422		10609000	4326700	2730300	5285400	4663700	1.76693	0.29224	1.26215	0	2.51013	1.02372
>AT1G51470.1 | Symbols: BGLU35, TGG5 | beta glucosidase 35 | chr1:19087424-19090248 FORWARD LENGTH=511	127280000	74292000	88183000	158970000	88270000	137790000	0.752552	0.293375	0.214074	0.991715	0.578854	0.687087
>AT1G25570.1 | Symbols: | Di-glucose binding protein with Leucine-rich repeat domain | chr1:8992183-8995430 REVERSE LENGTH=628	12063000	15729000	22101000	25838000	16450000	21635000	0.780517	0.306881	0.238385	0.566134	0.738185	1.03723
>AT4G02980.1 | Symbols: ABP1, ABP | endoplasmic reticulum auxin binding protein 1 | chr4:1319902-1321449 REVERSE LENGTH=198	5418400	10483000	10898000	9032400	11330000	15550000	0.746244	0.307097	0.254863	0.452635	0.875714	0.910382
>AT1G28440.1 | Symbols: HSL1 | HAESA-like 1 | chr1:9996914-10000171 FORWARD LENGTH=996	458550		482520	2488100	945540	658520	0.344954	0.310209	0.199353	0.336167	0	0.35374
>AT4G14746.1 | Symbols: | CONTAINS InterPro DOMAIN/s: EGF-like (InterPro:IPR006210); Has 259 Blast hits to 234 proteins in 55 species: Archae - 0; Bacteria - 0; Metazoa - 184; Fungi - 0; Plants - 69; Viruses - 0; Other Eukaryotes - 6 (source: NCBI BLink).	4703400	12895000	10643000	12734000	10548000	13981000	0.757894	0.318452	0.340703	0.378665	1.03816	0.856855
>AT4G39640.1 | Symbols: GGT1 | gamma-glutamyl transpeptidase 1 | chr4:18400608-18402861 FORWARD LENGTH=572	10069000	7415800	10789000	5763200	8930300	8671000	1.21012	0.32018	0.228106	1.29286	0.952188	1.38531
>AT5G14030.1 | Symbols: | translocon-associated protein beta (TRAPB) family protein | chr5:4526878-4528253 FORWARD LENGTH=195	36948000	23892000	19799000	78452000	18614000	44772000	0.568529	0.322158	0.189435	0.781483	0.505337	0.418766
>AT3G47470.1 | Symbols: LHCA4, CAB4 | light-harvesting chlorophyll-protein complex I subunit A4 | chr3:17493622-17494773 REVERSE LENGTH=251	22377000	31949000	105850000	23306000	27268000	20726000	2.24651	0.325281	1.92208	0.941529	1.34428	4.45372
>AT5G59090.1 | Symbols: ATSBT4.12, SBT4.12 | subtilase 4.12 | chr5:23852125-23855235 REVERSE LENGTH=736	16015000	15621000	26171000	61410000	17214000	25899000	0.553055	0.326926	0.171653	0.45966	0.448351	0.751155
>AT1G53840.1 | Symbols: ATPME1, PME1 | pectin methylesterase 1 | chr1:20101533-20103458 FORWARD LENGTH=586	29642000	37595000	51776000	34481000	30200000	32360000	1.22642	0.328715	0.346619	0.916376	1.16224	1.60064
>AT5G20630.1 | Symbols: GLP3, GLP3A, GLP3B, ATGER3, GER3 | germin 3 | chr5:6975315-6975950 REVERSE LENGTH=211	717470000	921170000	698760000	709040000	517060000	766690000	1.17293	0.33037	0.185713	1.0801	1.38675	1.05193
>AT5G11700.2 | Symbols: | BEST Arabidopsis thaliana protein match is: glycine-rich protein (TAIR:AT4G32920.3); Has 8203 Blast hits to 3102 proteins in 389 species: Archae - 3; Bacteria - 5624; Metazoa - 852; Fungi - 139; Plants - 704; Viruses - 77; Other	305940		469200	1507500		527060	0.380987	0.332693	0.234142	0.300743	0	0.46123
>AT5G63140.1 | Symbols: ATPAP29, PAP29 | purple acid phosphatase 29 | chr5:25328237-25329616 FORWARD LENGTH=389	7029200	1048200	2919600	4836400	4716000	8422800	0.611787	0.339073	0.510621	1.17315	0.174941	0.487271
>AT1G36050.1 | Symbols: | Endoplasmic reticulum vesicle transporter protein | chr1:13450467-13453683 FORWARD LENGTH=489		1145300	1639700	5392600	906610	3637000	0.420432	0.339755	0.253952	0	0.345796	0.495068
>AT2G39730.1 | Symbols: RCA | rubisco activase | chr2:16570951-16573345 REVERSE LENGTH=474	199890000	513030000	661870000	405380000	208570000	294580000	1.5132	0.351699	0.77865	0.660044	1.69404	2.18552
>AT2G27190.1 | Symbols: PAP1, ATPAP1, PAP12, ATPAP12 | purple acid phosphatase 12 | chr2:11621400-11623438 REVERSE LENGTH=469		1131000	842560	3991300		1259600	0.375852	0.355171	0.223843	0	0.430783	0.32092
>AT5G51550.1 | Symbols: EXL3 | EXORDIUM like 3 | chr5:20939793-20940806 REVERSE LENGTH=337	15067000	17032000	11122000	30034000	12825000	17303000	0.71841	0.357853	0.150083	0.751321	0.849307	0.554603
>AT5G15350.1 | Symbols: ENODL17, AtENODL17 | early nodulin-like protein 17 | chr5:4985184-4986154 REVERSE LENGTH=172	473720000	467300000	616420000	978760000	558300000	507640000	0.761696	0.359463	0.123689	0.695046	0.685626	0.904416
>AT4G33740.2 | Symbols: | unknown protein; BEST Arabidopsis thaliana protein match is: unknown protein (TAIR:AT4G37820.1); Has 138092 Blast hits to 73110 proteins in 2951 species: Archae - 732; Bacteria - 17903; Metazoa - 48520; Fungi - 16808; Plants - 70	19279000	7169400	11866000	10359000	10907000	4315300	1.49775	0.360004	0.715996	2.26091	0.840778	1.39156
>AT3G48200.1 | Symbols: | unknown protein; FUNCTIONS IN: molecular_function unknown; INVOLVED IN: biological_process unknown; LOCATED IN: endomembrane system; EXPRESSED IN: 21 plant structures; EXPRESSED DURING: 13 growth stages; Has 210 Blast hits to 148	182520		466480	913400	287730	588740	0.543894	0.365956	0.394002	0.305922	0	0.781867
>AT3G09220.1 | Symbols: LAC7 | laccase 7 | chr3:2827434-2830477 REVERSE LENGTH=567	785270	4737400	7731300	11633000	1866900	10279000	0.557384	0.391783	0.439551	0.0990714	0.597681	0.975398
>AT3G60130.1 | Symbols: BGLU16 | beta glucosidase 16 | chr3:22210343-22213650 FORWARD LENGTH=514	1830500	1504400	2908400	7820400	897510	3439400	0.513543	0.393997	0.181319	0.451704	0.371233	0.717692
>ENSEMBL:ENSBTAP00000024462 (Bos taurus) 47 kDa protein;>ENSEMBL:ENSBTAP00000024466 (Bos taurus) 44 kDa protein	3841000	4505300		3643800		3941800	1.10028	0.405787	0.641256	1.01271	1.18786	0
>AT4G23220.1 | Symbols: CRK14 | cysteine-rich RLK (RECEPTOR-like protein kinase) 14 | chr4:12154091-12157091 REVERSE LENGTH=728		248820	468750	403010		3431300	0.187144	0.412583	0.122329	0	0.129786	0.244503
>AT5G34850.1 | Symbols: ATPAP26, PAP26 | purple acid phosphatase 26 | chr5:13108475-13111217 REVERSE LENGTH=475		3130600	4871300	13705000	1379600	9899600	0.480418	0.429356	0.296405	0	0.37591	0.584926
>AT3G45970.1 | Symbols: ATEXLA1, EXPL1, ATEXPL1, ATHEXP BETA 2.1, EXLA1 | expansin-like A1 | chr3:16896238-16897189 FORWARD LENGTH=265	3918000	4828700	3683200	5863000	3944300		0.844942	0.434727	0.123392	0.798997	0.984715	0.751114
>AT5G22880.1 | Symbols: H2B, HTB2 | histone B2 | chr5:7652130-7652567 REVERSE LENGTH=145	14739000	4518800	22596000	31042000		12859000	0.635579	0.464528	0.412943	0.671465	0.205863	1.02941
>AT1G02065.2 | Symbols: SPL8 | squamosa promoter binding protein-like 8 | chr1:365625-366365 FORWARD LENGTH=246		5999700	6043600	11164000	5718800		0.713347	0.467914	0.411859	0	0.710747	0.715948
>AT1G66250.1 | Symbols: | O-Glycosyl hydrolases family 17 protein | chr1:24693063-24695416 FORWARD LENGTH=505	13528000	6465800	6310900	10122000	18033000	7566300	0.736387	0.471161	0.346248	1.13613	0.543021	0.530012
>AT2G38960.2 | Symbols: AERO2, ERO2 | endoplasmic reticulum oxidoreductins 2 | chr2:16265455-16267792 FORWARD LENGTH=478;>AT1G72280.1 | Symbols: AERO1, ERO1 | endoplasmic reticulum oxidoreductins 1 | chr1:27212039-27214506 REVERSE LENGTH=469		2055900	2321300	823400	1628400	2530000	1.31796	0.472356	0.765108	0	1.23805	1.39787
>AT4G16210.1 | Symbols: ECHIA, E-COAH-2 | enoyl-CoA hydratase/isomerase A | chr4:9176864-9177978 REVERSE LENGTH=265	2001700		4845500	3786500	5282300	4151300	0.776908	0.475598	0.552548	0.45424	0	1.09958
>AT3G16110.1 | Symbols: ATPDIL1-6, ATPDI4, PDI4, PDIL1-6 | PDI-like 1-6 | chr3:5460955-5463666 REVERSE LENGTH=534		1493400	1934200	2951600	1017700	3721700	0.668496	0.478015	0.395415	0	0.582525	0.754466
>AT3G52850.1 | Symbols: VSR1, BP-80, ATELP, BP80, BP80B, ATELP1, ATVSR1, GFS1, VSR1;1, BP80-1;1 | vacuolar sorting receptor homolog 1 | chr3:19587999-19591690 FORWARD LENGTH=623	1154800	5610700	5121700	10657000	1651000	6492100	0.632295	0.479783	0.389952	0.184276	0.89532	0.817288
>AT1G78830.1 | Symbols: | Curculin-like (mannose-binding) lectin family protein | chr1:29637141-29638508 REVERSE LENGTH=455	303120000	470120000	351140000	458080000	424020000	371760000	0.896735	0.481119	0.205707	0.725248	1.12481	0.840142
>P00761 SWISS-PROT:P00761|TRYP_PIG Trypsin - Sus scrofa (Pig).	3131000	3971500	2981000	2403700	25850000	699860	0.348265	0.481807	0.0553153	0.324416	0.411504	0.308874
>AT2G45470.1 | Symbols: FLA8, AGP8 | FASCICLIN-like arabinogalactan protein 8 | chr2:18742797-18744059 REVERSE LENGTH=420	26024000	43146000	27568000	39839000	13916000	20964000	1.29469	0.481823	0.380272	1.04487	1.73233	1.10687
>AT1G27950.1 | Symbols: LTPG1 | glycosylphosphatidylinositol-anchored lipid protein transfer 1 | chr1:9740740-9741991 FORWARD LENGTH=193	202470000	232410000	232600000	262310000	204010000	246430000	0.936485	0.494071	0.072989	0.852206	0.978225	0.979025
>AT3G13410.1 | Symbols: | unknown protein; FUNCTIONS IN: molecular_function unknown; INVOLVED IN: biological_process unknown; LOCATED IN: endoplasmic reticulum; EXPRESSED IN: 25 plant structures; EXPRESSED DURING: 15 growth stages; BEST Arabidopsis thalia		4135600	2254900	7333500	3151800	3426400	0.689042	0.498711	0.44652	0	0.891825	0.48626
>AT3G10740.1 | Symbols: ASD1, ARAF1, ARAF, ATASD1 | alpha-L-arabinofuranosidase 1 | chr3:3361031-3364573 REVERSE LENGTH=678	14086000		2199300	5983500	5855900	1688600	1.80573	0.503267	1.68049	3.12374	0	0.487722
>AT1G52780.1 | Symbols: | Protein of unknown function (DUF2921) | chr1:19658846-19662025 FORWARD LENGTH=1059		532150	1042100	2171100	576270	1055100	0.621011	0.506736	0.411119	0	0.419846	0.822176
>AT4G37930.1 | Symbols: SHM1, STM, SHMT1 | serine transhydroxymethyltransferase 1 | chr4:17831891-17834742 REVERSE LENGTH=517	53621000	30551000	101760000	61093000	33439000	42230000	1.35953	0.506821	0.796987	1.17623	0.670164	2.2322
>AT1G21750.1 | Symbols: ATPDIL1-1, ATPDI5, PDI5, PDIL1-1 | PDI-like 1-1 | chr1:7645767-7648514 FORWARD LENGTH=501	6041900	16779000	34214000	34018000	12993000	33286000	0.710299	0.509399	0.531208	0.225733	0.626885	1.27828
>AT1G09210.1 | Symbols: CRT1b, AtCRT1b | calreticulin 1b | chr1:2973217-2976655 REVERSE LENGTH=424	1155400		12835000	3224800		1446800	2.99478	0.512891	3.03977	0.494649	0	5.49491
>AT4G21410.1 | Symbols: CRK29 | cysteine-rich RLK (RECEPTOR-like protein kinase) 29 | chr4:11402463-11405025 REVERSE LENGTH=679	229140		432400	328920	335730	753160	0.699889	0.522236	0.457739	0.484846	0	0.914932
>AT3G54960.1 | Symbols: ATPDIL1-3, PDI1, ATPDI1, PDIL1-3 | PDI-like 1-3 | chr3:20363514-20366822 REVERSE LENGTH=579	22035000	19703000	28024000	23104000	17071000	54252000	0.738793	0.523798	0.13637	0.700065	0.625976	0.890339
>AT5G62630.1 | Symbols: HIPL2 | hipl2 protein precursor | chr5:25143719-25146390 REVERSE LENGTH=696	10267000	10067000	23372000	14693000	17475000	21614000	0.812651	0.525873	0.425304	0.572701	0.561545	1.30371
>AT4G24670.1 | Symbols: TAR2 | tryptophan aminotransferase related 2 | chr4:12727940-12730694 REVERSE LENGTH=440		2869300	5217400	6235800	3350600	5582000	0.799692	0.529141	0.516805	0	0.567489	1.0319
>AT5G13690.1 | Symbols: CYL1, NAGLU | alpha-N-acetylglucosaminidase family / NAGLU family | chr5:4415808-4420159 FORWARD LENGTH=806	2909900	2785200	3314600	6363900	2603200	2613700	0.777986	0.534327	0.0716961	0.753808	0.721505	0.858645
>AT5G03260.1 | Symbols: LAC11 | laccase 11 | chr5:777198-779338 REVERSE LENGTH=557		3810900	3343100	3966000		873810	1.47816	0.536386	0.858871	0	1.57481	1.3815
>AT1G48480.1 | Symbols: RKL1 | receptor-like kinase 1 | chr1:17918475-17920743 FORWARD LENGTH=655	730470	1423700	1889100	1984600	911030	2201300	0.793276	0.537891	0.343169	0.429947	0.837975	1.1119
>AT2G22990.2 | Symbols: SNG1, SCPL8 | sinapoylglucose 1 | chr2:9787071-9789925 FORWARD LENGTH=319	10651000	20950000	45368000	71500000	25866000	18379000	0.664988	0.544334	0.462152	0.276064	0.543004	1.1759
>AT3G06300.1 | Symbols: AT-P4H-2 | P4H isoform 2 | chr3:1907744-1909675 FORWARD LENGTH=299	6319400	21877000	19884000	21550000	7489500	39804000	0.698401	0.54779	0.368911	0.275381	0.953336	0.866487
>AT1G70530.1 | Symbols: CRK3 | cysteine-rich RLK (RECEPTOR-like protein kinase) 3 | chr1:26588750-26591379 REVERSE LENGTH=646		470310	1226100	1084900	703380	1622800	0.745985	0.562433	0.544019	0	0.413631	1.07834
>AT3G21630.1 | Symbols: CERK1, LYSM RLK1 | chitin elicitor receptor kinase 1 | chr3:7615543-7618530 REVERSE LENGTH=617	4395100	5558100	8152200	10667000	4869500	6439200	0.823883	0.564527	0.262577	0.599995	0.758761	1.11289
>AT3G51740.1 | Symbols: IMK2 | inflorescence meristem receptor-like kinase 2 | chr3:19189248-19191842 FORWARD LENGTH=836	3562400	2817900	5575000	6959000	2194300	5909300	0.793708	0.567264	0.28408	0.709519	0.561238	1.11037
>AT3G51730.1 | Symbols: | saposin B domain-containing protein | chr3:19186970-19188436 FORWARD LENGTH=213	32221000	45350000	46613000	54678000	27297000	64080000	0.850255	0.574899	0.163699	0.661826	0.931498	0.957441
>AT2G12400.1 | Symbols: | unknown protein; FUNCTIONS IN: molecular_function unknown; INVOLVED IN: biological_process unknown; LOCATED IN: endomembrane system; EXPRESSED IN: 25 plant structures; EXPRESSED DURING: 13 growth stages; BEST Arabidopsis thaliana	48495000	64692000	34860000	52941000	33857000	42867000	1.14177	0.581598	0.345529	1.12201	1.49675	0.80654
>AT5G20480.1 | Symbols: EFR | EF-TU receptor | chr5:6922497-6925679 FORWARD LENGTH=1031		169260	630270	573660	241780	973900	0.670244	0.585334	0.546897	0	0.283781	1.05671
>AT1G75140.1 | Symbols: | unknown protein; LOCATED IN: endoplasmic reticulum; EXPRESSED IN: 24 plant structures; EXPRESSED DURING: 13 growth stages; BEST Arabidopsis thaliana protein match is: unknown protein (TAIR:AT1G19370.1); Has 51 Blast hits to 49 pr	358110	833890	1648000		226340	3053100	0.577334	0.592368	0.397811	0.218397	0.508556	1.00505
>AT1G55120.1 | Symbols: ATFRUCT5, AtcwINV3, FRUCT5 | beta-fructofuranosidase 5 | chr1:20566617-20569165 FORWARD LENGTH=594	1475100		655770	543640		1017700	1.36477	0.608516	0.946699	1.88953	0	0.840009
>ATCG00490.1 | Symbols: RBCL | ribulose-bisphosphate carboxylases | chrC:54958-56397 FORWARD LENGTH=479	699730000	564280000	1364900000	1583400000	413710000	1355400000	0.784162	0.608925	0.383464	0.626155	0.504947	1.22138
>AT2G18030.2 | Symbols: | Peptide methionine sulfoxide reductase family protein | chr2:7840207-7841206 FORWARD LENGTH=192	5236700	2264600	4349500	4487800	4486500	4324400	0.891125	0.613552	0.344186	1.18133	0.510862	0.981186
>AT4G13930.1 | Symbols: SHM4 | serine hydroxymethyltransferase 4 | chr4:8048013-8050021 REVERSE LENGTH=471	12057000	28314000	57786000	41277000	38353000	40486000	0.817185	0.614237	0.578954	0.301134	0.707166	1.44325
>AT1G78680.1 | Symbols: ATGGH2, GGH2 | gamma-glutamyl hydrolase 2 | chr1:29593933-29596037 FORWARD LENGTH=347	9165900	9658500	16719000	14692000	10440000	14904000	0.887786	0.625893	0.316648	0.686824	0.723736	1.2528
>AT2G04780.1 | Symbols: FLA7 | FASCICLIN-like arabinoogalactan 7 | chr2:1677488-1678252 FORWARD LENGTH=254	101230000	136510000	134740000	174650000	166950000	81252000	0.880876	0.628111	0.141026	0.718195	0.968495	0.955937
>AT1G05070.1 | Symbols: | Protein of unknown function (DUF1068) | chr1:1457172-1458531 REVERSE LENGTH=184	12017000	16443000	15477000	16583000	9675300	13955000	1.0926	0.635071	0.173612	0.896494	1.22668	1.15462
>AT3G02110.1 | Symbols: scpl25 | serine carboxypeptidase-like 25 | chr3:370902-373637 REVERSE LENGTH=473	15755000	18977000	21187000	35247000	15219000	15835000	0.843411	0.635774	0.123603	0.712885	0.858675	0.958673
>AT5G60640.1 | Symbols: ATPDIL1-4, PDI2, ATPDI2, PDIL1-4 | PDI-like 1-4 | chr5:24371141-24373993 REVERSE LENGTH=597	38345000	18141000	49692000	44965000	27161000	52065000	0.854957	0.638535	0.386051	0.926275	0.43822	1.20038
>AT1G09870.1 | Symbols: | histidine acid phosphatase family protein | chr1:3205817-3208444 FORWARD LENGTH=487	66952000	62152000	59680000	56391000	46913000	73514000	1.06767	0.647095	0.0627354	1.13595	1.05451	1.01257
>AT5G35080.1 | Symbols: | INVOLVED IN: biological_process unknown; LOCATED IN: endomembrane system; EXPRESSED IN: 22 plant structures; EXPRESSED DURING: 13 growth stages; CONTAINS InterPro DOMAIN/s: Mannose-6-phosphate receptor, binding (InterPro:IPR00901		3387100	11349000	8001900		1199800	1.60145	0.649939	1.26632	0	0.73619	2.46672
>AT4G12880.1 | Symbols: ENODL19, AtENODL19 | early nodulin-like protein 19 | chr4:7544572-7545226 REVERSE LENGTH=141	2925900	21176000	25465000	49108000	6246000	15458000	0.699979	0.656128	0.507055	0.123958	0.897136	1.07884
>AT1G47600.1 | Symbols: BGLU34, TGG4 | beta glucosidase 34 | chr1:17491771-17494589 FORWARD LENGTH=511	1428500		1975400	2968200		1301500	0.797222	0.670481	0.477767	0.669134	0	0.925311
>AT1G78820.1 | Symbols: | D-mannose binding lectin protein with Apple-like carbohydrate-binding domain | chr1:29634401-29635768 REVERSE LENGTH=455	41215000	53912000	44628000	58117000	39158000	51001000	0.942533	0.693662	0.132945	0.833884	1.09078	0.902938
>AT4G10340.1 | Symbols: LHCB5 | light harvesting complex of photosystem II 5 | chr4:6408200-6409496 FORWARD LENGTH=280	149190000	209370000	458260000	625080000	119230000	293420000	0.787122	0.697085	0.473695	0.431297	0.605273	1.3248
>AT4G02770.1 | Symbols: PSAD-1 | photosystem I subunit D-1 | chr4:1229247-1229873 REVERSE LENGTH=208;>AT1G03130.1 | Symbols: PSAD-2 | photosystem I subunit D-2 | chr1:753528-754142 REVERSE LENGTH=204	6881600	7273200	10721000	11129000	3143800	15273000	0.84194	0.700302	0.21452	0.698739	0.738501	1.08858
>AT5G06320.1 | Symbols: NHL3 | NDR1/HIN1-like 3 | chr5:1931016-1931711 REVERSE LENGTH=231	29112000	32013000	52493000	46553000	26368000	54157000	0.894081	0.706383	0.300864	0.687263	0.755748	1.23923
>AT1G52400.1 | Symbols: BGL1, BGLU18, ATBG1 | beta glucosidase 18 | chr1:19515250-19517930 FORWARD LENGTH=528	36069000	21525000	33778000	38139000	23744000	21254000	1.09905	0.712402	0.282184	1.30155	0.77673	1.21888
>AT1G77630.1 | Symbols: | Peptidoglycan-binding LysM domain-containing protein | chr1:29173726-29175387 FORWARD LENGTH=423	11700000	9146400	12075000	11738000	9049900	10716000	1.04499	0.715723	0.151757	1.11415	0.870978	1.14986
>AT4G25240.1 | Symbols: SKS1 | SKU5 similar 1 | chr4:12930539-12933563 FORWARD LENGTH=589	2016400	2319600	4396700	7654200	711980	2923000	0.773546	0.715793	0.344305	0.535841	0.616413	1.16838
>AT2G39780.1 | Symbols: RNS2 | ribonuclease 2 | chr2:16591256-16593515 FORWARD LENGTH=259	10343000	38912000	34249000	37705000	26372000	30205000	0.885683	0.72325	0.487684	0.329108	1.23816	1.08978
>AT1G61520.1 | Symbols: LHCA3 | photosystem I light harvesting complex gene 3 | chr1:22700152-22701149 FORWARD LENGTH=273	34031000	36151000	83074000	112330000	19819000	53634000	0.824919	0.74734	0.447672	0.549528	0.583762	1.34147
>AT5G06870.1 | Symbols: PGIP2, ATPGIP2 | polygalacturonase inhibiting protein 2 | chr5:2133941-2135016 FORWARD LENGTH=330	10671000	13547000	11766000	14115000	6322000	13000000	1.07617	0.758029	0.130236	0.957412	1.21545	1.05566
>AT5G63910.1 | Symbols: FCLY | farnesylcysteine lyase | chr5:25572053-25574077 REVERSE LENGTH=500	1999000	3056700	3187300	3527600	2362600	2851900	0.942908	0.758619	0.223623	0.685991	1.04896	1.09378
>AT3G62730.1 | Symbols: | unknown protein; FUNCTIONS IN: molecular_function unknown; INVOLVED IN: biological_process unknown; LOCATED IN: endomembrane system; EXPRESSED IN: 13 plant structures; EXPRESSED DURING: LP.04 four leaves visible, 4 anthesis, LP.0	2593200	1261100	4373300	1782900	2018600	3406000	1.14153	0.758759	0.649933	1.07938	0.524912	1.82031
>AT1G02335.1 | Symbols: GL22 | germin-like protein subfamily 2 member 2 precursor | chr1:463979-464876 REVERSE LENGTH=219;>AT1G09560.1 | Symbols: GLP5 | germin-like protein 5 | chr1:3093896-3094639 FORWARD LENGTH=219	1483300	766400	13335000	2139400	1320700	7671500	1.40004	0.759956	1.90233	0.399754	0.206547	3.59382
>AT5G55730.1 | Symbols: FLA1 | FASCICLIN-like arabinogalactan 1 | chr5:22558375-22560392 REVERSE LENGTH=424	43324000	41712000	52256000	44984000	42126000	55228000	0.964549	0.760565	0.119709	0.913122	0.879147	1.10138
>AT5G44130.1 | Symbols: FLA13 | FASCICLIN-like arabinogalactan protein 13 precursor | chr5:17761128-17761871 FORWARD LENGTH=247	16932000	19328000	12235000	6518800		32325000	0.832308	0.765748	0.185778	0.871799	0.995165	0.629959
>AT1G32060.1 | Symbols: PRK | phosphoribulokinase | chr1:11532668-11534406 FORWARD LENGTH=395	18863000	46090000	179370000	145510000	37504000	116090000	0.81685	0.772945	0.86152	0.189195	0.462281	1.79907
>AT1G09780.1 | Symbols: | Phosphoglycerate mutase, 2,3-bisphosphoglycerate-independent | chr1:3165550-3167812 REVERSE LENGTH=557	2277200	825590	10184000	12748000	604170	4189100	0.757459	0.774636	0.861387	0.389459	0.141197	1.74172
>AT1G66150.1 | Symbols: TMK1 | transmembrane kinase 1 | chr1:24631503-24634415 FORWARD LENGTH=942	2649000	3360700	5134900	6588300	1420500	1683200	1.14988	0.80501	0.396276	0.819955	1.04025	1.58942
>AT3G16640.1 | Symbols: TCTP | translationally controlled tumor protein | chr3:5669709-5670729 REVERSE LENGTH=168	2581100	4110300	8689500	5553900	1829300	6202600	1.13213	0.806413	0.701889	0.569955	0.907631	1.9188
>AT3G20560.1 | Symbols: ATPDIL5-3, PDI12, ATPDI12, PDIL5-3 | PDI-like 5-3 | chr3:7182182-7186390 FORWARD LENGTH=483	1770600	10504000	8623200	6332500	6820900	5781400	1.10367	0.818511	0.728265	0.280531	1.66424	1.36625
>AT3G56750.1 | Symbols: | unknown protein; BEST Arabidopsis thaliana protein match is: unknown protein (TAIR:AT2G41150.2); Has 128 Blast hits to 128 proteins in 16 species: Archae - 0; Bacteria - 0; Metazoa - 0; Fungi - 0; Plants - 117; Viruses - 0; Other	1762100	1287900	2120700	3957100	1416400	547350	0.873304	0.823641	0.21166	0.892828	0.652558	1.07452
>AT5G34940.1 | Symbols: AtGUS3, GUS3 | glucuronidase 3 | chr5:13235912-13237799 REVERSE LENGTH=401	2395900	8247200	3546200	5779500	4219400	5505900	0.915155	0.824585	0.599816	0.463579	1.59574	0.686149
>AT3G11800.1 | Symbols: | unknown protein; FUNCTIONS IN: molecular_function unknown; INVOLVED IN: biological_process unknown; LOCATED IN: endomembrane system; EXPRESSED IN: 24 plant structures; EXPRESSED DURING: 15 growth stages; BEST Arabidopsis thaliana	3000000		13660000	9503600	5380900	7356900	1.12358	0.843491	0.968334	0.404651	0	1.84251
>AT1G79550.1 | Symbols: PGK | phosphoglycerate kinase | chr1:29924347-29926295 REVERSE LENGTH=401	8348600	3780100	18881000	15185000	7850700	11081000	0.90893	0.844472	0.680978	0.734121	0.332397	1.66027
>AT2G25060.1 | Symbols: ENODL14, AtENODL14 | early nodulin-like protein 14 | chr2:10662308-10662930 FORWARD LENGTH=182	128130000	122510000	135840000	138860000	150470000	105660000	0.978455	0.84902	0.0508285	0.973164	0.930479	1.03172
>AT1G28340.1 | Symbols: AtRLP4, RLP4 | receptor like protein 4 | chr1:9940175-9943252 FORWARD LENGTH=626	3418900	4401800	6471000	10301000	1405500	4230500	0.896762	0.852923	0.293268	0.643578	0.8286	1.21811
>AT2G39480.1 | Symbols: PGP6 | P-glycoprotein 6 | chr2:16478249-16484827 REVERSE LENGTH=1407		5842300	14128000	12528000	4223400	10684000	1.09185	0.863332	0.776274	0	0.638843	1.54487
>AT3G14210.1 | Symbols: ESM1 | epithiospecifier modifier 1 | chr3:4729886-4731562 FORWARD LENGTH=392	486570000	705420000	632910000	705870000	537740000	624670000	0.976781	0.866371	0.179012	0.781312	1.13273	1.0163
>AT2G17120.1 | Symbols: LYM2 | lysm domain GPI-anchored protein 2 precursor | chr2:7459156-7460648 FORWARD LENGTH=350	84688000	105100000	84007000	120820000	51191000	113940000	0.957489	0.869879	0.125752	0.888488	1.10264	0.881343
>AT1G01900.1 | Symbols: ATSBT1.1, SBTI1.1 | subtilase family protein | chr1:310332-313011 FORWARD LENGTH=774	625290		2423200	1126400	2515500	1348300	0.916343	0.883193	0.756282	0.375911	0	1.45678
>AT2G23810.1 | Symbols: TET8 | tetraspanin8 | chr2:10135859-10137352 REVERSE LENGTH=273	60845000	24286000	55066000	67455000	23705000	57037000	0.946018	0.88563	0.397835	1.23171	0.491629	1.11472
>AT1G56340.1 | Symbols: CRT1, CRT1a, AtCRT1a | calreticulin 1a | chr1:21090059-21092630 REVERSE LENGTH=425	141690000	138200000	214430000	231440000	130060000	149780000	0.966828	0.893796	0.252539	0.831384	0.810906	1.2582
>AT3G56310.2 | Symbols: | Melibiase family protein | chr3:20882886-20885745 FORWARD LENGTH=413	7211700	9445400	4921000	7168700	6313800	8420600	0.985162	0.943732	0.309855	0.987764	1.29371	0.674014
>AT2G44450.1 | Symbols: BGLU15 | beta glucosidase 15 | chr2:18340966-18343744 FORWARD LENGTH=506		2914900	3755300	1512300	3613300	4676900	1.02069	0.959968	0.603164	0	0.892089	1.14929
>AT1G67490.1 | Symbols: GCS1, KNF | glucosidase 1 | chr1:25280633-25286581 REVERSE LENGTH=852	265210		818000	720930		329850	1.03086	0.966154	0.794344	0.504787	0	1.55694
>AT1G52030.2 | Symbols: MBP2, MBP1.2, F-ATMBP | myrosinase-binding protein 2 | chr1:19346090-19348282 REVERSE LENGTH=642	1048200	2356800	1482700	2070500		1133300	1.01706	0.966928	0.416064	0.654348	1.47125	0.925588
>AT5G37660.1 | Symbols: PDLP7 | plasmodesmata-located protein 7 | chr5:14959842-14961379 FORWARD LENGTH=288	3736700	6172600	3806500	5423800	4357800	3838400	1.00703	0.974161	0.305431	0.823062	1.3596	0.838436
>AT3G20570.1 | Symbols: ENODL9, AtENODL9 | early nodulin-like protein 9 | chr3:7186754-7187453 REVERSE LENGTH=203	4929300	17464000	1676100	7967800		7730300	1.02218	0.97941	1.06207	0.628012	2.22498	0.213542
>AT4G20110.1 | Symbols: VSR7, VSR3;1, BP80-3;1 | VACUOLAR SORTING RECEPTOR 7 | chr4:10875567-10878545 FORWARD LENGTH=625;>AT1G30900.1 | Symbols: VSR6, VSR3;3, BP80-3;3 | VACUOLAR SORTING RECEPTOR 6 | chr1:10997275-11000543 FORWARD LENGTH=631	2207900	2475000	1989100	3021000		1443200	0.996371	0.990324	0.109023	0.989158	1.10882	0.891134
>AT1G04410.1 | Symbols: | Lactate/malate dehydrogenase family protein | chr1:1189418-1191267 REVERSE LENGTH=332	45794000	34446000	76170000	85528000	21828000	49594000	0.996559	0.993933	0.412355	0.875323	0.658414	1.45594
>AT5G25980.1 | Symbols: TGG2, BGLU37 | glucoside glucohydrolase 2 | chr5:9072730-9075143 FORWARD LENGTH=467	17296000	10393000	38619000	32413000	7912400	26102000	0.998203	0.997342	0.66452	0.781123	0.46937	1.74411
>AT4G16120.1 | Symbols: ATSEB1, COBL7, SEB1 | COBRA-like protein-7 precursor | chr4:9116591-9119138 REVERSE LENGTH=661	6775700	6427900	13630000	10667000	7220400	8957100	0.999594	0.99893	0.453887	0.757217	0.718348	1.52322

## Sheet: Title and Notes
Yellow lines highlighted label-free quantitative analyzes of PRX32 and PRX34 abundance changes in response to salt stress in WT, mns1 mns2 and cgl1 .
table S5 Lists of total glycoproteins and abundance analyses in this label-free proteomic study.
